# Supplementary material
Source: publisher figshare collection journal article supplement (https://acs.figshare.com/ndownloader/files/4193191)
Supplement: Supplementary file 1 [file 4193191]

 
data_3e
 
_audit_creation_method            SHELXL-97 
_chemical_name_systematic 
; 
 ? 
; 
_chemical_name_common             ? 
_chemical_melting_point           ? 
_chemical_formula_moiety          ? 
_chemical_formula_sum 
 'C17 H28 B10' 
_chemical_formula_weight          340.49 
 
loop_ 
 _atom_type_symbol 
 _atom_type_description 
 _atom_type_scat_dispersion_real 
 _atom_type_scat_dispersion_imag 
 _atom_type_scat_source 
 'C'  'C'   0.0033   0.0016 
 'International Tables Vol C Tables 4.2.6.8 and 6.1.1.4' 
 'H'  'H'   0.0000   0.0000 
 'International Tables Vol C Tables 4.2.6.8 and 6.1.1.4' 
 'B'  'B'   0.0013   0.0007 
 'International Tables Vol C Tables 4.2.6.8 and 6.1.1.4' 
 
_symmetry_cell_setting            triclinic 
_symmetry_space_group_name_H-M    P-1 
 
loop_ 
 _symmetry_equiv_pos_as_xyz 
 'x, y, z' 
 '-x, -y, -z' 
 
_cell_length_a                    9.7263(15) 
_cell_length_b                    14.740(2) 
_cell_length_c                    14.927(2) 
_cell_angle_alpha                 79.451(3) 
_cell_angle_beta                  81.489(3) 
_cell_angle_gamma                 81.424(3) 
_cell_volume                      2064.1(5) 
_cell_formula_units_Z             4 
_cell_measurement_temperature     293(2) 
_cell_measurement_reflns_used     ? 
_cell_measurement_theta_min       ? 
_cell_measurement_theta_max       ? 
 
_exptl_crystal_description        block 
_exptl_crystal_colour             colorless 
_exptl_crystal_size_max           0.50 
_exptl_crystal_size_mid           0.40 
_exptl_crystal_size_min           0.30 
_exptl_crystal_density_meas       ? 
_exptl_crystal_density_diffrn     1.096 
_exptl_crystal_density_method     'not measured' 
_exptl_crystal_F_000              720 
_exptl_absorpt_coefficient_mu     0.054 
_exptl_absorpt_correction_type    multi-scan 
_exptl_absorpt_correction_T_min   0.9735 
_exptl_absorpt_correction_T_max   0.9840 
_exptl_absorpt_process_details    ? 
 
_exptl_special_details 
; 
 ? 
; 
 
_diffrn_ambient_temperature       293(2) 
_diffrn_radiation_wavelength      0.71073 
_diffrn_radiation_type            MoK\a 
_diffrn_radiation_source          'fine-focus sealed tube' 
_diffrn_radiation_monochromator   graphite 
_diffrn_measurement_device_type   ? 
_diffrn_measurement_method        ? 
_diffrn_detector_area_resol_mean  ? 
_diffrn_standards_number          ? 
_diffrn_standards_interval_count  ? 
_diffrn_standards_interval_time   ? 
_diffrn_standards_decay_%         ? 
_diffrn_reflns_number             11471 
_diffrn_reflns_av_R_equivalents   0.0381 
_diffrn_reflns_av_sigmaI/netI     0.0709 
_diffrn_reflns_limit_h_min        -11 
_diffrn_reflns_limit_h_max        11 
_diffrn_reflns_limit_k_min        -17 
_diffrn_reflns_limit_k_max        17 
_diffrn_reflns_limit_l_min        -17 
_diffrn_reflns_limit_l_max        17 
_diffrn_reflns_theta_min          1.40 
_diffrn_reflns_theta_max          25.25 
_reflns_number_total              7425 
_reflns_number_gt                 4377 
_reflns_threshold_expression      >2sigma(I) 
 
_computing_data_collection        ? 
_computing_cell_refinement        ? 
_computing_data_reduction         ? 
_computing_structure_solution     'SHELXS-97 (Sheldrick, 1990)' 
_computing_structure_refinement   'SHELXL-97 (Sheldrick, 1997)' 
_computing_molecular_graphics     ? 
_computing_publication_material   ? 
 
_refine_special_details 
; 
 Refinement of F^2^ against ALL reflections.  The weighted R-factor wR and 
 goodness of fit S are based on F^2^, conventional R-factors R are based 
 on F, with F set to zero for negative F^2^. The threshold expression of 
 F^2^ > 2sigma(F^2^) is used only for calculating R-factors(gt) etc. and is 
 not relevant to the choice of reflections for refinement.  R-factors based 
 on F^2^ are statistically about twice as large as those based on F, and R- 
 factors based on ALL data will be even larger. 
; 
 
_refine_ls_structure_factor_coef  Fsqd  
_refine_ls_matrix_type            full 
_refine_ls_weighting_scheme       calc  
_refine_ls_weighting_details 
 'calc w=1/[\s^2^(Fo^2^)+(0.1145P)^2^+0.2976P] where P=(Fo^2^+2Fc^2^)/3' 
_atom_sites_solution_primary      direct 
_atom_sites_solution_secondary    difmap 
_atom_sites_solution_hydrogens    geom 
_refine_ls_hydrogen_treatment     riding 
_refine_ls_extinction_method      none 
_refine_ls_extinction_coef        ? 
_refine_ls_number_reflns          7425 
_refine_ls_number_parameters      505 
_refine_ls_number_restraints      4 
_refine_ls_R_factor_all           0.1151 
_refine_ls_R_factor_gt            0.0706 
_refine_ls_wR_factor_ref          0.2312 
_refine_ls_wR_factor_gt           0.1909 
_refine_ls_goodness_of_fit_ref    1.059 
_refine_ls_restrained_S_all       1.060 
_refine_ls_shift/su_max           0.018 
_refine_ls_shift/su_mean          0.002 
 
loop_ 
 _atom_site_label 
 _atom_site_type_symbol 
 _atom_site_fract_x 
 _atom_site_fract_y 
 _atom_site_fract_z 
 _atom_site_U_iso_or_equiv 
 _atom_site_adp_type 
 _atom_site_occupancy 
 _atom_site_symmetry_multiplicity 
 _atom_site_calc_flag 
 _atom_site_refinement_flags 
 _atom_site_disorder_assembly 
 _atom_site_disorder_group 
C1' C 0.2711(2) 0.16492(17) 0.58184(16) 0.0375(6) Uani 1 1 d . . . 
C1 C 0.3853(3) 0.33693(17) 0.92040(17) 0.0400(6) Uani 1 1 d . . . 
C2' C 0.3823(3) 0.23718(18) 0.53157(18) 0.0445(7) Uani 1 1 d . . . 
C2 C 0.5069(3) 0.26464(18) 0.97030(19) 0.0472(7) Uani 1 1 d . . . 
C11' C 0.3248(3) 0.08811(17) 0.65259(17) 0.0406(6) Uani 1 1 d . . . 
C11 C 0.4346(3) 0.41671(18) 0.85374(18) 0.0454(7) Uani 1 1 d . . . 
C12' C 0.2279(3) 0.01673(18) 0.69222(18) 0.0439(7) Uani 1 1 d . . . 
C12 C 0.3231(3) 0.48645(18) 0.81392(18) 0.0450(7) Uani 1 1 d . . . 
C13' C 0.2350(4) -0.0615(2) 0.6517(2) 0.0621(9) Uani 1 1 d . . . 
H13A H 0.3002 -0.0693 0.6006 0.074 Uiso 1 1 calc R . . 
C13 C 0.2757(3) 0.4799(2) 0.7331(2) 0.0591(8) Uani 1 1 d . . . 
H13B H 0.3139 0.4308 0.7022 0.071 Uiso 1 1 calc R . . 
C14' C 0.1467(4) -0.1280(2) 0.6862(2) 0.0757(10) Uani 1 1 d . . . 
H14A H 0.1517 -0.1797 0.6578 0.091 Uiso 1 1 calc R . . 
C14 C 0.1711(4) 0.5459(2) 0.6968(2) 0.0708(10) Uani 1 1 d . . . 
H14B H 0.1405 0.5410 0.6419 0.085 Uiso 1 1 calc R . . 
C15' C 0.0520(4) -0.1181(2) 0.7620(2) 0.0680(9) Uani 1 1 d . . . 
H15A H -0.0077 -0.1629 0.7852 0.082 Uiso 1 1 calc R . . 
C15 C 0.1139(4) 0.6176(2) 0.7423(3) 0.0749(10) Uani 1 1 d . . . 
H15B H 0.0433 0.6610 0.7186 0.090 Uiso 1 1 calc R . . 
C16' C 0.0452(3) -0.0422(2) 0.8036(2) 0.0648(9) Uani 1 1 d . . . 
H16A H -0.0183 -0.0361 0.8559 0.078 Uiso 1 1 calc R . . 
C16 C 0.1595(4) 0.6259(2) 0.8219(3) 0.0833(12) Uani 1 1 d . . . 
H16B H 0.1206 0.6751 0.8524 0.100 Uiso 1 1 calc R . . 
C17' C 0.1319(3) 0.0256(2) 0.76866(18) 0.0529(7) Uani 1 1 d . . . 
H17A H 0.1253 0.0775 0.7970 0.063 Uiso 1 1 calc R . . 
C17 C 0.2645(4) 0.5604(2) 0.8576(2) 0.0664(9) Uani 1 1 d . . . 
H17B H 0.2958 0.5666 0.9119 0.080 Uiso 1 1 calc R . . 
C18' C 0.4543(3) 0.08230(18) 0.67574(18) 0.0479(7) Uani 1 1 d . . . 
C18 C 0.5720(3) 0.4260(2) 0.8340(2) 0.0573(8) Uani 1 1 d . A . 
C19' C 0.5015(4) 0.0039(2) 0.7501(2) 0.0716(10) Uani 1 1 d . . . 
H19A H 0.4271 -0.0336 0.7725 0.107 Uiso 1 1 calc R . . 
H19B H 0.5251 0.0295 0.7997 0.107 Uiso 1 1 calc R . . 
H19C H 0.5821 -0.0338 0.7252 0.107 Uiso 1 1 calc R . . 
C19 C 0.6142(4) 0.5096(3) 0.7660(3) 0.0879(12) Uani 1 1 d . . . 
H19D H 0.5322 0.5462 0.7438 0.132 Uiso 1 1 calc R . . 
H19E H 0.6764 0.4891 0.7154 0.132 Uiso 1 1 calc R . . 
H19F H 0.6608 0.5467 0.7956 0.132 Uiso 1 1 calc R . . 
C20' C 0.5542(3) 0.14880(19) 0.63189(19) 0.0491(7) Uani 1 1 d . . . 
C20 C 0.6822(3) 0.3598(2) 0.8770(2) 0.0663(9) Uani 1 1 d D . . 
C21' C 0.6992(3) 0.1325(2) 0.6636(2) 0.0635(9) Uani 1 1 d . . . 
H21A H 0.7381 0.1911 0.6522 0.076 Uiso 1 1 calc R . . 
H21B H 0.6908 0.1101 0.7292 0.076 Uiso 1 1 calc R . . 
C21 C 0.8345(9) 0.3723(10) 0.8301(9) 0.062(3) Uani 0.50 1 d PD A 1 
C22 C 0.8851(8) 0.4398(5) 0.8814(5) 0.071(2) Uani 0.50 1 d PD A 1 
C21" C 0.8349(11) 0.3853(15) 0.8653(9) 0.081(4) Uani 0.50 1 d PD A 2 
C22" C 0.8954(9) 0.3631(7) 0.7697(6) 0.102(3) Uani 0.50 1 d PD A 2 
C22' C 0.7975(3) 0.0630(3) 0.6145(3) 0.0777(10) Uani 1 1 d . . . 
H22G H 0.8872 0.0542 0.6365 0.117 Uiso 1 1 calc R . . 
H22H H 0.8080 0.0858 0.5497 0.117 Uiso 1 1 calc R . . 
H22I H 0.7598 0.0048 0.6262 0.117 Uiso 1 1 calc R . . 
C23' C 0.5236(3) 0.22014(19) 0.56395(19) 0.0475(7) Uani 1 1 d . . . 
C23 C 0.6538(3) 0.2851(2) 0.9412(2) 0.0560(8) Uani 1 1 d . A . 
C24' C 0.6255(3) 0.2881(2) 0.5184(2) 0.0651(9) Uani 1 1 d . . . 
H24A H 0.5983 0.3171 0.4588 0.078 Uiso 1 1 calc R . . 
H24B H 0.7182 0.2540 0.5084 0.078 Uiso 1 1 calc R . . 
C24 C 0.7650(3) 0.2159(2) 0.9862(3) 0.0762(10) Uani 1 1 d . . . 
H24C H 0.7222 0.1848 1.0444 0.091 Uiso 1 1 calc R A . 
H24D H 0.8359 0.2497 0.9994 0.091 Uiso 1 1 calc R . . 
C25' C 0.6322(4) 0.3643(2) 0.5746(3) 0.0904(12) Uani 1 1 d . . . 
H25A H 0.6975 0.4053 0.5419 0.136 Uiso 1 1 calc R . . 
H25B H 0.6623 0.3363 0.6329 0.136 Uiso 1 1 calc R . . 
H25C H 0.5411 0.3990 0.5841 0.136 Uiso 1 1 calc R . . 
C25 C 0.8370(4) 0.1418(3) 0.9287(3) 0.1117(16) Uani 1 1 d . A . 
H25D H 0.9049 0.1005 0.9621 0.168 Uiso 1 1 calc R . . 
H25E H 0.8831 0.1716 0.8719 0.168 Uiso 1 1 calc R . . 
H25F H 0.7682 0.1071 0.9161 0.168 Uiso 1 1 calc R . . 
B3' B 0.3400(3) 0.1582(2) 0.4689(2) 0.0497(8) Uani 1 1 d . . . 
H3' H 0.4126 0.0997 0.4465 0.060 Uiso 1 1 calc R . . 
B3 B 0.3964(3) 0.3399(2) 1.0342(2) 0.0504(8) Uani 1 1 d . . . 
H3 H 0.4293 0.3981 1.0592 0.061 Uiso 1 1 calc R . . 
B4' B 0.1612(3) 0.1493(2) 0.5070(2) 0.0492(8) Uani 1 1 d . . . 
H4' H 0.1173 0.0842 0.5093 0.059 Uiso 1 1 calc R . . 
B4 B 0.2322(3) 0.3482(2) 0.9940(2) 0.0500(8) Uani 1 1 d . . . 
H4 H 0.1575 0.4122 0.9931 0.060 Uiso 1 1 calc R . . 
B5' B 0.1024(3) 0.2215(2) 0.5919(2) 0.0487(8) Uani 1 1 d . . . 
H5' H 0.0208 0.2029 0.6490 0.058 Uiso 1 1 calc R . . 
B5 B 0.2507(3) 0.2797(2) 0.9060(2) 0.0475(8) Uani 1 1 d . . . 
H5 H 0.1882 0.2998 0.8481 0.057 Uiso 1 1 calc R . . 
B6' B 0.2441(3) 0.2766(2) 0.6081(2) 0.0508(8) Uani 1 1 d . . . 
H6' H 0.2548 0.2941 0.6751 0.061 Uiso 1 1 calc R . . 
B6 B 0.4261(3) 0.2274(2) 0.8906(2) 0.0501(8) Uani 1 1 d . . . 
H6 H 0.4783 0.2129 0.8232 0.060 Uiso 1 1 calc R . . 
B7' B 0.3554(4) 0.2746(3) 0.4180(2) 0.0622(10) Uani 1 1 d . . . 
H7' H 0.4391 0.2917 0.3618 0.075 Uiso 1 1 calc R . . 
B7 B 0.4437(4) 0.2225(3) 1.0826(2) 0.0593(10) Uani 1 1 d . . . 
H7 H 0.5080 0.2042 1.1396 0.071 Uiso 1 1 calc R . . 
B8' B 0.2124(4) 0.2213(3) 0.4026(2) 0.0633(10) Uani 1 1 d . . . 
H8' H 0.2007 0.2041 0.3356 0.076 Uiso 1 1 calc R . . 
B8 B 0.2681(4) 0.2733(3) 1.0973(2) 0.0626(10) Uani 1 1 d . . . 
H8 H 0.2159 0.2877 1.1647 0.075 Uiso 1 1 calc R . . 
B9' B 0.0649(4) 0.2600(3) 0.4785(2) 0.0624(10) Uani 1 1 d . . . 
H9' H -0.0427 0.2675 0.4611 0.075 Uiso 1 1 calc R . . 
B9 B 0.1776(3) 0.2362(3) 1.0185(2) 0.0577(10) Uani 1 1 d . . . 
H9 H 0.0661 0.2265 1.0347 0.069 Uiso 1 1 calc R . . 
B10' B 0.1175(4) 0.3383(3) 0.5393(3) 0.0648(11) Uani 1 1 d . . . 
H10' H 0.0448 0.3971 0.5611 0.078 Uiso 1 1 calc R . . 
B10 B 0.2966(4) 0.1618(3) 0.9545(3) 0.0603(10) Uani 1 1 d . . . 
H10 H 0.2632 0.1041 0.9291 0.072 Uiso 1 1 calc R . . 
B11' B 0.2977(4) 0.3467(2) 0.5029(3) 0.0633(10) Uani 1 1 d . . . 
H11' H 0.3446 0.4105 0.5013 0.076 Uiso 1 1 calc R . . 
B11 B 0.4623(4) 0.1536(2) 0.9947(3) 0.0624(10) Uani 1 1 d . . . 
H11 H 0.5388 0.0906 0.9953 0.075 Uiso 1 1 calc R . . 
B12' B 0.1862(4) 0.3376(3) 0.4231(3) 0.0708(12) Uani 1 1 d . . . 
H12' H 0.1580 0.3964 0.3692 0.085 Uiso 1 1 calc R . . 
B12 B 0.3090(4) 0.1586(3) 1.0731(3) 0.0647(11) Uani 1 1 d . . . 
H12 H 0.2839 0.0980 1.1249 0.078 Uiso 1 1 calc R . . 
 
loop_ 
 _atom_site_aniso_label 
 _atom_site_aniso_U_11 
 _atom_site_aniso_U_22 
 _atom_site_aniso_U_33 
 _atom_site_aniso_U_23 
 _atom_site_aniso_U_13 
 _atom_site_aniso_U_12 
C1' 0.0267(13) 0.0407(14) 0.0430(14) 0.0020(11) -0.0052(10) -0.0074(11) 
C1 0.0285(13) 0.0455(15) 0.0422(14) 0.0040(11) -0.0084(11) -0.0020(11) 
C2' 0.0337(14) 0.0451(15) 0.0509(16) 0.0077(12) -0.0067(12) -0.0107(12) 
C2 0.0315(14) 0.0466(16) 0.0596(17) 0.0043(13) -0.0116(12) -0.0023(12) 
C11' 0.0354(15) 0.0409(14) 0.0422(14) 0.0026(11) -0.0061(11) -0.0044(11) 
C11 0.0423(16) 0.0435(15) 0.0461(15) 0.0039(12) -0.0038(12) -0.0076(12) 
C12' 0.0414(15) 0.0420(15) 0.0435(15) 0.0063(12) -0.0065(12) -0.0049(12) 
C12 0.0480(17) 0.0399(15) 0.0437(15) 0.0044(12) -0.0069(12) -0.0071(12) 
C13' 0.068(2) 0.0498(18) 0.0624(19) -0.0022(15) 0.0130(16) -0.0175(15) 
C13 0.074(2) 0.0510(18) 0.0518(18) -0.0029(14) -0.0136(16) -0.0061(16) 
C14' 0.095(3) 0.0495(19) 0.082(2) -0.0089(17) 0.010(2) -0.0288(18) 
C14 0.089(3) 0.067(2) 0.0571(19) 0.0092(17) -0.0353(18) -0.0097(19) 
C15' 0.065(2) 0.056(2) 0.077(2) 0.0131(17) 0.0009(18) -0.0261(16) 
C15 0.079(3) 0.055(2) 0.086(2) 0.0092(18) -0.034(2) 0.0036(18) 
C16' 0.062(2) 0.067(2) 0.0575(19) 0.0048(16) 0.0105(16) -0.0194(17) 
C16 0.106(3) 0.060(2) 0.080(2) -0.0086(18) -0.036(2) 0.020(2) 
C17' 0.0562(19) 0.0532(17) 0.0457(16) -0.0014(13) 0.0023(14) -0.0124(14) 
C17 0.084(2) 0.0557(19) 0.0604(19) -0.0055(16) -0.0289(17) 0.0043(17) 
C18' 0.0447(17) 0.0461(16) 0.0502(16) 0.0028(12) -0.0143(13) -0.0019(13) 
C18 0.0423(17) 0.0536(18) 0.068(2) 0.0074(15) 0.0009(14) -0.0102(14) 
C19' 0.060(2) 0.072(2) 0.075(2) 0.0207(17) -0.0266(17) -0.0029(17) 
C19 0.071(2) 0.081(3) 0.098(3) 0.023(2) 0.007(2) -0.030(2) 
C20' 0.0333(15) 0.0548(17) 0.0595(17) -0.0051(14) -0.0123(13) -0.0055(13) 
C20 0.0307(16) 0.066(2) 0.096(2) 0.0014(18) 0.0008(16) -0.0104(14) 
C21' 0.0415(17) 0.073(2) 0.079(2) -0.0107(17) -0.0220(15) -0.0028(15) 
C21 0.030(4) 0.074(6) 0.079(10) -0.008(7) 0.003(5) -0.015(4) 
C22 0.052(4) 0.074(5) 0.094(5) -0.021(4) -0.004(4) -0.031(4) 
C21" 0.046(5) 0.130(11) 0.066(8) -0.011(7) 0.012(5) -0.031(6) 
C22" 0.056(5) 0.179(10) 0.071(5) -0.028(6) 0.014(4) -0.028(5) 
C22' 0.047(2) 0.086(3) 0.102(3) -0.020(2) -0.0144(19) -0.0021(18) 
C23' 0.0317(14) 0.0513(16) 0.0590(17) -0.0027(13) -0.0078(12) -0.0094(12) 
C23 0.0280(15) 0.0546(18) 0.083(2) -0.0038(16) -0.0122(14) -0.0020(13) 
C24' 0.0371(17) 0.066(2) 0.089(2) 0.0016(18) -0.0059(16) -0.0185(15) 
C24 0.0373(18) 0.075(2) 0.116(3) -0.004(2) -0.0297(18) -0.0007(16) 
C25' 0.067(2) 0.068(2) 0.140(4) -0.009(2) -0.019(2) -0.0271(19) 
C25 0.061(3) 0.093(3) 0.167(4) -0.012(3) -0.014(3) 0.025(2) 
B3' 0.0416(18) 0.062(2) 0.0434(17) 0.0026(15) -0.0057(14) -0.0134(15) 
B3 0.0442(19) 0.061(2) 0.0451(18) -0.0022(15) -0.0119(14) -0.0058(16) 
B4' 0.0375(17) 0.059(2) 0.0501(18) 0.0037(15) -0.0112(14) -0.0136(15) 
B4 0.0319(17) 0.061(2) 0.0493(18) 0.0043(15) -0.0023(14) -0.0019(15) 
B5' 0.0309(17) 0.0506(19) 0.059(2) 0.0036(15) -0.0049(14) -0.0035(14) 
B5 0.0329(17) 0.058(2) 0.0507(18) 0.0059(15) -0.0131(14) -0.0123(14) 
B6' 0.0433(19) 0.0409(18) 0.065(2) -0.0010(15) -0.0056(16) -0.0074(14) 
B6 0.0423(19) 0.0472(19) 0.061(2) -0.0070(15) -0.0102(15) -0.0041(15) 
B7' 0.047(2) 0.077(3) 0.053(2) 0.0241(18) -0.0067(16) -0.0179(18) 
B7 0.045(2) 0.070(2) 0.057(2) 0.0165(17) -0.0208(16) -0.0098(17) 
B8' 0.052(2) 0.085(3) 0.048(2) 0.0145(18) -0.0138(16) -0.0160(19) 
B8 0.048(2) 0.081(3) 0.051(2) 0.0101(18) -0.0049(16) -0.0106(19) 
B9' 0.0394(19) 0.072(2) 0.067(2) 0.0195(19) -0.0165(16) -0.0079(17) 
B9 0.0331(18) 0.072(2) 0.061(2) 0.0158(18) -0.0087(15) -0.0158(16) 
B10' 0.043(2) 0.049(2) 0.092(3) 0.0115(19) -0.0098(19) 0.0008(16) 
B10 0.050(2) 0.053(2) 0.078(2) 0.0044(18) -0.0201(18) -0.0152(17) 
B11' 0.048(2) 0.0439(19) 0.089(3) 0.0194(18) -0.0110(19) -0.0103(16) 
B11 0.042(2) 0.049(2) 0.091(3) 0.0128(19) -0.0209(18) -0.0063(16) 
B12' 0.049(2) 0.071(3) 0.078(3) 0.037(2) -0.0175(19) -0.0129(18) 
B12 0.050(2) 0.068(2) 0.069(2) 0.0290(19) -0.0217(18) -0.0192(18) 
 
_geom_special_details 
; 
 All esds (except the esd in the dihedral angle between two l.s. planes) 
 are estimated using the full covariance matrix.  The cell esds are taken 
 into account individually in the estimation of esds in distances, angles 
 and torsion angles; correlations between esds in cell parameters are only 
 used when they are defined by crystal symmetry.  An approximate (isotropic) 
 treatment of cell esds is used for estimating esds involving l.s. planes. 
; 
 
loop_ 
 _geom_bond_atom_site_label_1 
 _geom_bond_atom_site_label_2 
 _geom_bond_distance 
 _geom_bond_site_symmetry_2 
 _geom_bond_publ_flag 
C1' C11' 1.490(3) . ? 
C1' C2' 1.636(3) . ? 
C1' B4' 1.722(4) . ? 
C1' B5' 1.725(4) . ? 
C1' B3' 1.734(4) . ? 
C1' B6' 1.735(4) . ? 
C1 C11 1.484(3) . ? 
C1 C2 1.638(3) . ? 
C1 B5 1.718(4) . ? 
C1 B4 1.721(4) . ? 
C1 B3 1.727(4) . ? 
C1 B6 1.727(4) . ? 
C2' C23' 1.495(4) . ? 
C2' B11' 1.709(4) . ? 
C2' B7' 1.730(4) . ? 
C2' B6' 1.734(4) . ? 
C2' B3' 1.747(4) . ? 
C2 C23 1.490(4) . ? 
C2 B11 1.716(4) . ? 
C2 B6 1.726(4) . ? 
C2 B7 1.732(4) . ? 
C2 B3 1.739(4) . ? 
C11' C18' 1.342(4) . ? 
C11' C12' 1.499(4) . ? 
C11 C18 1.347(4) . ? 
C11 C12 1.490(4) . ? 
C12' C17' 1.376(4) . ? 
C12' C13' 1.385(4) . ? 
C12 C13 1.378(4) . ? 
C12 C17 1.379(4) . ? 
C13' C14' 1.377(4) . ? 
C13 C14 1.396(4) . ? 
C14' C15' 1.365(5) . ? 
C14 C15 1.364(5) . ? 
C15' C16' 1.363(4) . ? 
C15 C16 1.360(5) . ? 
C16' C17' 1.384(4) . ? 
C16 C17 1.393(4) . ? 
C18' C20' 1.481(4) . ? 
C18' C19' 1.517(4) . ? 
C18 C20 1.475(4) . ? 
C18 C19 1.513(4) . ? 
C20' C23' 1.352(4) . ? 
C20' C21' 1.525(4) . ? 
C20 C23 1.354(4) . ? 
C20 C21" 1.564(8) . ? 
C20 C21 1.564(8) . ? 
C21' C22' 1.509(4) . ? 
C21 C22 1.534(8) . ? 
C21" C22" 1.533(8) . ? 
C23' C24' 1.515(4) . ? 
C23 C24 1.515(4) . ? 
C24' C25' 1.535(5) . ? 
C24 C25 1.536(5) . ? 
B3' B8' 1.751(5) . ? 
B3' B7' 1.763(5) . ? 
B3' B4' 1.764(4) . ? 
B3 B8 1.757(5) . ? 
B3 B4 1.767(5) . ? 
B3 B7 1.770(5) . ? 
B4' B8' 1.768(5) . ? 
B4' B9' 1.769(5) . ? 
B4' B5' 1.780(5) . ? 
B4 B9 1.768(5) . ? 
B4 B8 1.772(5) . ? 
B4 B5 1.773(5) . ? 
B5' B9' 1.758(5) . ? 
B5' B6' 1.767(5) . ? 
B5' B10' 1.774(5) . ? 
B5 B6 1.765(5) . ? 
B5 B9 1.769(4) . ? 
B5 B10 1.774(5) . ? 
B6' B10' 1.760(5) . ? 
B6' B11' 1.770(5) . ? 
B6 B10 1.761(5) . ? 
B6 B11 1.776(5) . ? 
B7' B8' 1.759(5) . ? 
B7' B12' 1.764(5) . ? 
B7' B11' 1.776(6) . ? 
B7 B12 1.759(5) . ? 
B7 B8 1.759(5) . ? 
B7 B11 1.774(6) . ? 
B8' B12' 1.771(6) . ? 
B8' B9' 1.782(5) . ? 
B8 B12 1.768(6) . ? 
B8 B9 1.773(5) . ? 
B9' B10' 1.766(6) . ? 
B9' B12' 1.775(5) . ? 
B9 B10 1.769(5) . ? 
B9 B12 1.771(5) . ? 
B10' B12' 1.766(6) . ? 
B10' B11' 1.772(5) . ? 
B10 B11 1.782(5) . ? 
B10 B12 1.784(5) . ? 
B11' B12' 1.760(6) . ? 
B11 B12 1.755(5) . ? 
 
loop_ 
 _geom_angle_atom_site_label_1 
 _geom_angle_atom_site_label_2 
 _geom_angle_atom_site_label_3 
 _geom_angle 
 _geom_angle_site_symmetry_1 
 _geom_angle_site_symmetry_3 
 _geom_angle_publ_flag 
C11' C1' C2' 115.8(2) . . ? 
C11' C1' B4' 122.6(2) . . ? 
C2' C1' B4' 111.15(19) . . ? 
C11' C1' B5' 123.4(2) . . ? 
C2' C1' B5' 110.8(2) . . ? 
B4' C1' B5' 62.16(18) . . ? 
C11' C1' B3' 116.1(2) . . ? 
C2' C1' B3' 62.38(17) . . ? 
B4' C1' B3' 61.40(17) . . ? 
B5' C1' B3' 112.9(2) . . ? 
C11' C1' B6' 117.4(2) . . ? 
C2' C1' B6' 61.81(17) . . ? 
B4' C1' B6' 112.9(2) . . ? 
B5' C1' B6' 61.41(18) . . ? 
B3' C1' B6' 114.4(2) . . ? 
C11 C1 C2 115.9(2) . . ? 
C11 C1 B5 123.6(2) . . ? 
C2 C1 B5 110.9(2) . . ? 
C11 C1 B4 122.1(2) . . ? 
C2 C1 B4 111.15(19) . . ? 
B5 C1 B4 62.08(18) . . ? 
C11 C1 B3 115.5(2) . . ? 
C2 C1 B3 62.18(17) . . ? 
B5 C1 B3 113.1(2) . . ? 
B4 C1 B3 61.66(17) . . ? 
C11 C1 B6 118.0(2) . . ? 
C2 C1 B6 61.65(17) . . ? 
B5 C1 B6 61.62(18) . . ? 
B4 C1 B6 112.9(2) . . ? 
B3 C1 B6 114.2(2) . . ? 
C23' C2' C1' 116.4(2) . . ? 
C23' C2' B11' 122.3(2) . . ? 
C1' C2' B11' 110.9(2) . . ? 
C23' C2' B7' 123.6(2) . . ? 
C1' C2' B7' 110.2(2) . . ? 
B11' C2' B7' 62.2(2) . . ? 
C23' C2' B6' 116.0(2) . . ? 
C1' C2' B6' 61.89(16) . . ? 
B11' C2' B6' 61.87(19) . . ? 
B7' C2' B6' 113.0(2) . . ? 
C23' C2' B3' 118.0(2) . . ? 
C1' C2' B3' 61.56(16) . . ? 
B11' C2' B3' 112.4(2) . . ? 
B7' C2' B3' 60.92(19) . . ? 
B6' C2' B3' 113.8(2) . . ? 
C23 C2 C1 116.2(2) . . ? 
C23 C2 B11 122.8(2) . . ? 
C1 C2 B11 111.0(2) . . ? 
C23 C2 B6 116.5(2) . . ? 
C1 C2 B6 61.72(17) . . ? 
B11 C2 B6 62.11(19) . . ? 
C23 C2 B7 123.3(2) . . ? 
C1 C2 B7 110.4(2) . . ? 
B11 C2 B7 61.9(2) . . ? 
B6 C2 B7 113.0(2) . . ? 
C23 C2 B3 117.4(2) . . ? 
C1 C2 B3 61.43(16) . . ? 
B11 C2 B3 112.5(2) . . ? 
B6 C2 B3 113.6(2) . . ? 
B7 C2 B3 61.31(19) . . ? 
C18' C11' C1' 121.2(2) . . ? 
C18' C11' C12' 122.9(2) . . ? 
C1' C11' C12' 115.9(2) . . ? 
C18 C11 C1 121.1(2) . . ? 
C18 C11 C12 122.9(2) . . ? 
C1 C11 C12 115.9(2) . . ? 
C17' C12' C13' 118.3(3) . . ? 
C17' C12' C11' 122.2(3) . . ? 
C13' C12' C11' 119.5(2) . . ? 
C13 C12 C17 118.0(3) . . ? 
C13 C12 C11 121.8(3) . . ? 
C17 C12 C11 120.3(3) . . ? 
C14' C13' C12' 120.9(3) . . ? 
C12 C13 C14 121.0(3) . . ? 
C15' C14' C13' 120.1(3) . . ? 
C15 C14 C13 119.7(3) . . ? 
C16' C15' C14' 119.8(3) . . ? 
C16 C15 C14 120.5(3) . . ? 
C15' C16' C17' 120.5(3) . . ? 
C15 C16 C17 119.7(3) . . ? 
C12' C17' C16' 120.4(3) . . ? 
C12 C17 C16 121.2(3) . . ? 
C11' C18' C20' 123.1(2) . . ? 
C11' C18' C19' 118.7(3) . . ? 
C20' C18' C19' 118.2(3) . . ? 
C11 C18 C20 123.1(3) . . ? 
C11 C18 C19 118.1(3) . . ? 
C20 C18 C19 118.7(3) . . ? 
C23' C20' C18' 123.0(3) . . ? 
C23' C20' C21' 119.5(3) . . ? 
C18' C20' C21' 117.5(2) . . ? 
C23 C20 C18 122.9(3) . . ? 
C23 C20 C21" 116.1(8) . . ? 
C18 C20 C21" 119.8(8) . . ? 
C23 C20 C21 122.0(7) . . ? 
C18 C20 C21 114.3(7) . . ? 
C21" C20 C21 21.8(5) . . ? 
C22' C21' C20' 111.9(3) . . ? 
C22 C21 C20 105.1(7) . . ? 
C22" C21" C20 103.1(7) . . ? 
C20' C23' C2' 120.4(2) . . ? 
C20' C23' C24' 123.3(3) . . ? 
C2' C23' C24' 116.3(2) . . ? 
C20 C23 C2 120.7(3) . . ? 
C20 C23 C24 123.9(3) . . ? 
C2 C23 C24 115.4(3) . . ? 
C23' C24' C25' 113.5(3) . . ? 
C23 C24 C25 114.6(3) . . ? 
C1' B3' C2' 56.07(16) . . ? 
C1' B3' B8' 105.3(2) . . ? 
C2' B3' B8' 105.1(2) . . ? 
C1' B3' B7' 104.3(2) . . ? 
C2' B3' B7' 59.05(19) . . ? 
B8' B3' B7' 60.1(2) . . ? 
C1' B3' B4' 58.97(17) . . ? 
C2' B3' B4' 104.2(2) . . ? 
B8' B3' B4' 60.38(19) . . ? 
B7' B3' B4' 108.0(2) . . ? 
C1 B3 C2 56.38(16) . . ? 
C1 B3 B8 105.3(2) . . ? 
C2 B3 B8 105.1(2) . . ? 
C1 B3 B4 59.00(17) . . ? 
C2 B3 B4 104.4(2) . . ? 
B8 B3 B4 60.37(19) . . ? 
C1 B3 B7 104.6(2) . . ? 
C2 B3 B7 59.15(19) . . ? 
B8 B3 B7 59.8(2) . . ? 
B4 B3 B7 108.0(3) . . ? 
C1' B4' B3' 59.63(17) . . ? 
C1' B4' B8' 105.1(2) . . ? 
B3' B4' B8' 59.44(18) . . ? 
C1' B4' B9' 104.8(2) . . ? 
B3' B4' B9' 108.2(2) . . ? 
B8' B4' B9' 60.5(2) . . ? 
C1' B4' B5' 59.01(17) . . ? 
B3' B4' B5' 108.9(2) . . ? 
B8' B4' B5' 108.0(3) . . ? 
B9' B4' B5' 59.41(19) . . ? 
C1 B4 B3 59.34(17) . . ? 
C1 B4 B9 104.9(2) . . ? 
B3 B4 B9 107.9(2) . . ? 
C1 B4 B8 104.9(2) . . ? 
B3 B4 B8 59.53(19) . . ? 
B9 B4 B8 60.1(2) . . ? 
C1 B4 B5 58.87(17) . . ? 
B3 B4 B5 108.6(2) . . ? 
B9 B4 B5 59.93(19) . . ? 
B8 B4 B5 108.1(2) . . ? 
C1' B5' B9' 105.1(2) . . ? 
C1' B5' B6' 59.56(17) . . ? 
B9' B5' B6' 108.1(2) . . ? 
C1' B5' B10' 105.1(2) . . ? 
B9' B5' B10' 60.0(2) . . ? 
B6' B5' B10' 59.61(19) . . ? 
C1' B5' B4' 58.83(17) . . ? 
B9' B5' B4' 60.0(2) . . ? 
B6' B5' B4' 108.7(2) . . ? 
B10' B5' B4' 107.9(2) . . ? 
C1 B5 B6 59.45(17) . . ? 
C1 B5 B9 105.0(2) . . ? 
B6 B5 B9 107.7(2) . . ? 
C1 B5 B4 59.06(17) . . ? 
B6 B5 B4 108.7(2) . . ? 
B9 B5 B4 59.90(19) . . ? 
C1 B5 B10 105.4(2) . . ? 
B6 B5 B10 59.70(19) . . ? 
B9 B5 B10 59.9(2) . . ? 
B4 B5 B10 108.2(2) . . ? 
C2' B6' C1' 56.30(15) . . ? 
C2' B6' B10' 105.1(2) . . ? 
C1' B6' B10' 105.3(2) . . ? 
C2' B6' B5' 104.5(2) . . ? 
C1' B6' B5' 59.03(17) . . ? 
B10' B6' B5' 60.4(2) . . ? 
C2' B6' B11' 58.38(18) . . ? 
C1' B6' B11' 103.7(2) . . ? 
B10' B6' B11' 60.3(2) . . ? 
B5' B6' B11' 107.9(3) . . ? 
C2 B6 C1 56.63(16) . . ? 
C2 B6 B10 105.8(2) . . ? 
C1 B6 B10 105.6(2) . . ? 
C2 B6 B5 104.7(2) . . ? 
C1 B6 B5 58.93(17) . . ? 
B10 B6 B5 60.41(19) . . ? 
C2 B6 B11 58.68(19) . . ? 
C1 B6 B11 104.2(2) . . ? 
B10 B6 B11 60.50(19) . . ? 
B5 B6 B11 108.1(2) . . ? 
C2' B7' B8' 105.5(2) . . ? 
C2' B7' B3' 60.03(17) . . ? 
B8' B7' B3' 59.6(2) . . ? 
C2' B7' B12' 104.6(3) . . ? 
B8' B7' B12' 60.4(2) . . ? 
B3' B7' B12' 108.2(2) . . ? 
C2' B7' B11' 58.33(19) . . ? 
B8' B7' B11' 108.0(3) . . ? 
B3' B7' B11' 108.5(2) . . ? 
B12' B7' B11' 59.6(2) . . ? 
C2 B7 B12 104.7(3) . . ? 
C2 B7 B8 105.3(2) . . ? 
B12 B7 B8 60.3(2) . . ? 
C2 B7 B3 59.54(17) . . ? 
B12 B7 B3 108.1(2) . . ? 
B8 B7 B3 59.7(2) . . ? 
C2 B7 B11 58.61(19) . . ? 
B12 B7 B11 59.6(2) . . ? 
B8 B7 B11 107.9(3) . . ? 
B3 B7 B11 108.4(2) . . ? 
B3' B8' B7' 60.3(2) . . ? 
B3' B8' B4' 60.18(18) . . ? 
B7' B8' B4' 108.0(2) . . ? 
B3' B8' B12' 108.4(3) . . ? 
B7' B8' B12' 60.0(2) . . ? 
B4' B8' B12' 107.8(3) . . ? 
B3' B8' B9' 108.2(2) . . ? 
B7' B8' B9' 107.9(3) . . ? 
B4' B8' B9' 59.76(19) . . ? 
B12' B8' B9' 59.9(2) . . ? 
B3 B8 B7 60.46(19) . . ? 
B3 B8 B12 108.3(3) . . ? 
B7 B8 B12 59.8(2) . . ? 
B3 B8 B4 60.10(18) . . ? 
B7 B8 B4 108.3(2) . . ? 
B12 B8 B4 107.9(3) . . ? 
B3 B8 B9 108.1(2) . . ? 
B7 B8 B9 108.0(3) . . ? 
B12 B8 B9 60.0(2) . . ? 
B4 B8 B9 59.8(2) . . ? 
B5' B9' B10' 60.4(2) . . ? 
B5' B9' B4' 60.61(18) . . ? 
B10' B9' B4' 108.8(2) . . ? 
B5' B9' B12' 108.0(3) . . ? 
B10' B9' B12' 59.8(2) . . ? 
B4' B9' B12' 107.6(2) . . ? 
B5' B9' B8' 108.3(2) . . ? 
B10' B9' B8' 108.1(3) . . ? 
B4' B9' B8' 59.73(19) . . ? 
B12' B9' B8' 59.7(2) . . ? 
B10 B9 B4 108.7(2) . . ? 
B10 B9 B5 60.17(19) . . ? 
B4 B9 B5 60.17(18) . . ? 
B10 B9 B12 60.5(2) . . ? 
B4 B9 B12 108.0(2) . . ? 
B5 B9 B12 108.2(2) . . ? 
B10 B9 B8 108.7(2) . . ? 
B4 B9 B8 60.1(2) . . ? 
B5 B9 B8 108.3(2) . . ? 
B12 B9 B8 59.8(2) . . ? 
B6' B10' B9' 108.1(2) . . ? 
B6' B10' B12' 108.2(3) . . ? 
B9' B10' B12' 60.4(2) . . ? 
B6' B10' B11' 60.15(19) . . ? 
B9' B10' B11' 107.8(3) . . ? 
B12' B10' B11' 59.7(2) . . ? 
B6' B10' B5' 60.00(18) . . ? 
B9' B10' B5' 59.6(2) . . ? 
B12' B10' B5' 107.7(3) . . ? 
B11' B10' B5' 107.5(2) . . ? 
B6 B10 B9 107.8(2) . . ? 
B6 B10 B5 59.89(18) . . ? 
B9 B10 B5 59.90(19) . . ? 
B6 B10 B11 60.2(2) . . ? 
B9 B10 B11 106.9(3) . . ? 
B5 B10 B11 107.4(2) . . ? 
B6 B10 B12 107.4(3) . . ? 
B9 B10 B12 59.8(2) . . ? 
B5 B10 B12 107.4(3) . . ? 
B11 B10 B12 59.0(2) . . ? 
C2' B11' B12' 105.7(3) . . ? 
C2' B11' B6' 59.75(17) . . ? 
B12' B11' B6' 108.1(2) . . ? 
C2' B11' B10' 105.7(2) . . ? 
B12' B11' B10' 60.0(2) . . ? 
B6' B11' B10' 59.59(19) . . ? 
C2' B11' B7' 59.49(19) . . ? 
B12' B11' B7' 59.9(2) . . ? 
B6' B11' B7' 109.1(2) . . ? 
B10' B11' B7' 108.1(3) . . ? 
C2 B11 B12 105.6(3) . . ? 
C2 B11 B7 59.49(19) . . ? 
B12 B11 B7 59.8(2) . . ? 
C2 B11 B6 59.21(18) . . ? 
B12 B11 B6 108.0(2) . . ? 
B7 B11 B6 108.7(2) . . ? 
C2 B11 B10 105.3(2) . . ? 
B12 B11 B10 60.6(2) . . ? 
B7 B11 B10 108.4(3) . . ? 
B6 B11 B10 59.34(19) . . ? 
B11' B12' B7' 60.5(2) . . ? 
B11' B12' B10' 60.3(2) . . ? 
B7' B12' B10' 108.9(3) . . ? 
B11' B12' B8' 108.2(2) . . ? 
B7' B12' B8' 59.7(2) . . ? 
B10' B12' B8' 108.6(2) . . ? 
B11' B12' B9' 107.9(2) . . ? 
B7' B12' B9' 108.0(2) . . ? 
B10' B12' B9' 59.8(2) . . ? 
B8' B12' B9' 60.3(2) . . ? 
B11 B12 B7 60.6(2) . . ? 
B11 B12 B8 108.4(2) . . ? 
B7 B12 B8 59.8(2) . . ? 
B11 B12 B9 108.0(2) . . ? 
B7 B12 B9 108.1(2) . . ? 
B8 B12 B9 60.1(2) . . ? 
B11 B12 B10 60.5(2) . . ? 
B7 B12 B10 109.0(2) . . ? 
B8 B12 B10 108.3(2) . . ? 
B9 B12 B10 59.7(2) . . ? 
 
_diffrn_measured_fraction_theta_max    0.993 
_diffrn_reflns_theta_full              25.25 
_diffrn_measured_fraction_theta_full   0.993 
_refine_diff_density_max    0.293 
_refine_diff_density_min   -0.238 
_refine_diff_density_rms    0.049 

#===END


data_3h
 
_audit_creation_method            SHELXL-97 
_chemical_name_systematic 
; 
 ? 
; 
_chemical_name_common             ? 
_chemical_melting_point           ? 
_chemical_formula_moiety          ? 
_chemical_formula_sum 
 'C18 H38 B10' 
_chemical_formula_weight          362.58 
 
loop_ 
 _atom_type_symbol 
 _atom_type_description 
 _atom_type_scat_dispersion_real 
 _atom_type_scat_dispersion_imag 
 _atom_type_scat_source 
 'C'  'C'   0.0033   0.0016 
 'International Tables Vol C Tables 4.2.6.8 and 6.1.1.4' 
 'H'  'H'   0.0000   0.0000 
 'International Tables Vol C Tables 4.2.6.8 and 6.1.1.4' 
 'B'  'B'   0.0013   0.0007 
 'International Tables Vol C Tables 4.2.6.8 and 6.1.1.4' 
 
_symmetry_cell_setting            Triclinic 
_symmetry_space_group_name_H-M    P-1 
 
loop_ 
 _symmetry_equiv_pos_as_xyz 
 'x, y, z' 
 '-x, -y, -z' 
 
_cell_length_a                    9.7765(17) 
_cell_length_b                    10.1792(17) 
_cell_length_c                    13.111(2) 
_cell_angle_alpha                 82.254(3) 
_cell_angle_beta                  81.311(3) 
_cell_angle_gamma                 62.982(3) 
_cell_volume                      1145.8(3) 
_cell_formula_units_Z             2 
_cell_measurement_temperature     293(2) 
_cell_measurement_reflns_used     ? 
_cell_measurement_theta_min       ? 
_cell_measurement_theta_max       ? 
 
_exptl_crystal_description        block 
_exptl_crystal_colour             colourless 
_exptl_crystal_size_max           0.30 
_exptl_crystal_size_mid           0.30 
_exptl_crystal_size_min           0.20 
_exptl_crystal_density_meas       ? 
_exptl_crystal_density_diffrn     1.051 
_exptl_crystal_density_method     'not measured' 
_exptl_crystal_F_000              392 
_exptl_absorpt_coefficient_mu     0.052 
_exptl_absorpt_correction_type    multi-scan 
_exptl_absorpt_correction_T_min   0.6065  
_exptl_absorpt_correction_T_max   0.7456
_exptl_absorpt_process_details    ? 
 
_exptl_special_details 
; 
 ? 
; 
 
_diffrn_ambient_temperature       293(2) 
_diffrn_radiation_wavelength      0.71073 
_diffrn_radiation_type            MoK\a 
_diffrn_radiation_source          'fine-focus sealed tube' 
_diffrn_radiation_monochromator   graphite 
_diffrn_measurement_device_type   'BRUKER SMART CCD DIFFRACTOMETER' 
_diffrn_measurement_method        'OMEGA SCAN' 
_diffrn_detector_area_resol_mean  ? 
_diffrn_reflns_number             6246 
_diffrn_reflns_av_R_equivalents   0.0461 
_diffrn_reflns_av_sigmaI/netI     0.0995 
_diffrn_reflns_limit_h_min        -11 
_diffrn_reflns_limit_h_max        11 
_diffrn_reflns_limit_k_min        -12 
_diffrn_reflns_limit_k_max        11 
_diffrn_reflns_limit_l_min        -14 
_diffrn_reflns_limit_l_max        15 
_diffrn_reflns_theta_min          1.58 
_diffrn_reflns_theta_max          25.00 
_reflns_number_total              4007 
_reflns_number_gt                 2127 
_reflns_threshold_expression      >2sigma(I) 
 
_computing_data_collection        'BRUKER SMART CCD DIFFRACTOMETER'  
_computing_cell_refinement        'BRUKER SMART CCD DIFFRACTOMETER'  
_computing_data_reduction         'BRUKER SMART CCD DIFFRACTOMETER'  
_computing_structure_solution     'SHELXS-97 (Sheldrick, 2008)' 
_computing_structure_refinement   'SHELXL-97 (Sheldrick, 2008)' 
_computing_molecular_graphics     'SIEMENS SHELXTL' 
_computing_publication_material   'SIEMENS SHELXTL' 
 
_refine_special_details 
; 
 Refinement of F^2^ against ALL reflections.  The weighted R-factor wR and 
 goodness of fit S are based on F^2^, conventional R-factors R are based 
 on F, with F set to zero for negative F^2^. The threshold expression of 
 F^2^ > 2sigma(F^2^) is used only for calculating R-factors(gt) etc. and is 
 not relevant to the choice of reflections for refinement.  R-factors based 
 on F^2^ are statistically about twice as large as those based on F, and R- 
 factors based on ALL data will be even larger. 
; 
 
_refine_ls_structure_factor_coef  Fsqd  
_refine_ls_matrix_type            full 
_refine_ls_weighting_scheme       calc  
_refine_ls_weighting_details 
 'calc w=1/[\s^2^(Fo^2^)+(0.0852P)^2^+0.1929P] where P=(Fo^2^+2Fc^2^)/3' 
_atom_sites_solution_primary      direct 
_atom_sites_solution_secondary    difmap 
_atom_sites_solution_hydrogens    geom 
_refine_ls_hydrogen_treatment     riding
_refine_ls_extinction_method      none 
_refine_ls_extinction_coef        ? 
_refine_ls_number_reflns          4007 
_refine_ls_number_parameters      253 
_refine_ls_number_restraints      0 
_refine_ls_R_factor_all           0.1338 
_refine_ls_R_factor_gt            0.0653 
_refine_ls_wR_factor_ref          0.1968 
_refine_ls_wR_factor_gt           0.1559 
_refine_ls_goodness_of_fit_ref    1.004 
_refine_ls_restrained_S_all       1.004 
_refine_ls_shift/su_max           0.005 
_refine_ls_shift/su_mean          0.001 
 
loop_ 
 _atom_site_label 
 _atom_site_type_symbol 
 _atom_site_fract_x 
 _atom_site_fract_y 
 _atom_site_fract_z 
 _atom_site_U_iso_or_equiv 
 _atom_site_adp_type 
 _atom_site_occupancy 
 _atom_site_symmetry_multiplicity 
 _atom_site_calc_flag 
 _atom_site_refinement_flags 
 _atom_site_disorder_assembly 
 _atom_site_disorder_group 
C1 C 0.7857(3) 1.2145(3) 0.2137(2) 0.0340(7) Uani 1 1 d . . . 
C2 C 0.9616(3) 1.0755(3) 0.2264(2) 0.0340(7) Uani 1 1 d . . . 
C11 C 0.9678(3) 0.9234(3) 0.2560(2) 0.0340(7) Uani 1 1 d . . . 
C12 C 1.1237(3) 0.7845(3) 0.2740(2) 0.0419(8) Uani 1 1 d . . . 
C13 C 1.1302(4) 0.6527(3) 0.2234(3) 0.0618(10) Uani 1 1 d . . . 
H13A H 1.0417 0.6365 0.2504 0.093 Uiso 1 1 calc R . . 
H13B H 1.2226 0.5654 0.2386 0.093 Uiso 1 1 calc R . . 
H13C H 1.1303 0.6743 0.1499 0.093 Uiso 1 1 calc R . . 
C14 C 1.1430(4) 0.7511(4) 0.3903(3) 0.0674(10) Uani 1 1 d . . . 
H14A H 1.1389 0.8357 0.4178 0.101 Uiso 1 1 calc R . . 
H14B H 1.2407 0.6677 0.4003 0.101 Uiso 1 1 calc R . . 
H14C H 1.0614 0.7291 0.4253 0.101 Uiso 1 1 calc R . . 
C15 C 1.2722(3) 0.7941(4) 0.2232(3) 0.0649(10) Uani 1 1 d . . . 
H15A H 1.2800 0.8734 0.2500 0.097 Uiso 1 1 calc R . . 
H15B H 1.2686 0.8123 0.1497 0.097 Uiso 1 1 calc R . . 
H15C H 1.3602 0.7026 0.2384 0.097 Uiso 1 1 calc R . . 
C16 C 0.8303(3) 0.9158(3) 0.2769(2) 0.0341(7) Uani 1 1 d . . . 
C17 C 0.8111(3) 0.7914(3) 0.3460(2) 0.0442(8) Uani 1 1 d . . . 
H17A H 0.9118 0.7106 0.3569 0.053 Uiso 1 1 calc R . . 
H17B H 0.7547 0.7546 0.3127 0.053 Uiso 1 1 calc R . . 
C18 C 0.7236(4) 0.8482(4) 0.4501(2) 0.0545(9) Uani 1 1 d . . . 
H18A H 0.7828 0.8819 0.4835 0.065 Uiso 1 1 calc R . . 
H18B H 0.6259 0.9327 0.4378 0.065 Uiso 1 1 calc R . . 
C19 C 0.6929(5) 0.7332(4) 0.5227(3) 0.0819(12) Uani 1 1 d . . . 
H19A H 0.7891 0.6438 0.5272 0.098 Uiso 1 1 calc R . . 
H19B H 0.6585 0.7694 0.5912 0.098 Uiso 1 1 calc R . . 
C20 C 0.5750(5) 0.6947(5) 0.4911(4) 0.1017(15) Uani 1 1 d . . . 
H20A H 0.5645 0.6195 0.5395 0.153 Uiso 1 1 calc R . . 
H20B H 0.6076 0.6589 0.4233 0.153 Uiso 1 1 calc R . . 
H20C H 0.4775 0.7812 0.4903 0.153 Uiso 1 1 calc R . . 
C21 C 0.6830(3) 1.0327(3) 0.2433(2) 0.0340(7) Uani 1 1 d . . . 
C22 C 0.5615(3) 0.9835(3) 0.2285(2) 0.0451(8) Uani 1 1 d . . . 
H22A H 0.5465 0.9251 0.2901 0.054 Uiso 1 1 calc R . . 
H22B H 0.4641 1.0700 0.2193 0.054 Uiso 1 1 calc R . . 
C23 C 0.6097(4) 0.8924(4) 0.1351(3) 0.0604(9) Uani 1 1 d . . . 
H23A H 0.5314 0.8630 0.1280 0.091 Uiso 1 1 calc R . . 
H23B H 0.7053 0.8061 0.1446 0.091 Uiso 1 1 calc R . . 
H23C H 0.6226 0.9508 0.0739 0.091 Uiso 1 1 calc R . . 
C24 C 0.6578(3) 1.1731(3) 0.2163(2) 0.0339(7) Uani 1 1 d . . . 
C25 C 0.5078(3) 1.2950(3) 0.1824(2) 0.0461(8) Uani 1 1 d . . . 
H25A H 0.5042 1.3893 0.1923 0.055 Uiso 1 1 calc R . . 
H25B H 0.4233 1.2864 0.2272 0.055 Uiso 1 1 calc R . . 
C26 C 0.4817(4) 1.2962(4) 0.0707(3) 0.0661(10) Uani 1 1 d . . . 
H26A H 0.3843 1.3771 0.0562 0.099 Uiso 1 1 calc R . . 
H26B H 0.4815 1.2048 0.0603 0.099 Uiso 1 1 calc R . . 
H26C H 0.5630 1.3076 0.0253 0.099 Uiso 1 1 calc R . . 
B3 B 0.8667(4) 1.1950(4) 0.3257(3) 0.0411(9) Uani 1 1 d . . . 
H3 H 0.8255 1.1600 0.4023 0.049 Uiso 1 1 calc R . . 
B4 B 0.7620(4) 1.3712(4) 0.2638(3) 0.0467(9) Uani 1 1 d . . . 
H4 H 0.6516 1.4520 0.3001 0.056 Uiso 1 1 calc R . . 
B5 B 0.7943(4) 1.3545(4) 0.1288(3) 0.0457(9) Uani 1 1 d . . . 
H5 H 0.7046 1.4246 0.0775 0.055 Uiso 1 1 calc R . . 
B6 B 0.9186(4) 1.1670(4) 0.1048(3) 0.0408(8) Uani 1 1 d . . . 
H6 H 0.9106 1.1143 0.0395 0.049 Uiso 1 1 calc R . . 
B7 B 1.0642(4) 1.1391(4) 0.2865(3) 0.0485(10) Uani 1 1 d . . . 
H7 H 1.1529 1.0674 0.3380 0.058 Uiso 1 1 calc R . . 
B8 B 0.9395(4) 1.3264(4) 0.3091(3) 0.0545(10) Uani 1 1 d . . . 
H8 H 0.9465 1.3784 0.3752 0.065 Uiso 1 1 calc R . . 
B9 B 0.8952(4) 1.4244(4) 0.1874(3) 0.0569(11) Uani 1 1 d . . . 
H9 H 0.8734 1.5410 0.1742 0.068 Uiso 1 1 calc R . . 
B10 B 0.9908(4) 1.2999(4) 0.0894(3) 0.0545(10) Uani 1 1 d . . . 
H10 H 1.0309 1.3353 0.0126 0.065 Uiso 1 1 calc R . . 
B11 B 1.0958(4) 1.1242(4) 0.1492(3) 0.0468(9) Uani 1 1 d . . . 
H11 H 1.2049 1.0436 0.1116 0.056 Uiso 1 1 calc R . . 
B12 B 1.0819(4) 1.2814(4) 0.2012(3) 0.0574(11) Uani 1 1 d . . . 
H12 H 1.1828 1.3036 0.1974 0.069 Uiso 1 1 calc R . . 
 
loop_ 
 _atom_site_aniso_label 
 _atom_site_aniso_U_11 
 _atom_site_aniso_U_22 
 _atom_site_aniso_U_33 
 _atom_site_aniso_U_23 
 _atom_site_aniso_U_13 
 _atom_site_aniso_U_12 
C1 0.0309(15) 0.0311(16) 0.0366(17) -0.0007(12) -0.0044(12) -0.0110(13) 
C2 0.0283(15) 0.0349(16) 0.0366(17) -0.0002(12) -0.0040(12) -0.0127(13) 
C11 0.0326(16) 0.0340(16) 0.0334(17) -0.0024(12) -0.0040(12) -0.0127(14) 
C12 0.0281(16) 0.0353(17) 0.056(2) 0.0025(14) -0.0078(13) -0.0090(14) 
C13 0.046(2) 0.042(2) 0.088(3) -0.0143(18) -0.0029(18) -0.0092(16) 
C14 0.060(2) 0.066(2) 0.071(3) 0.0169(19) -0.0279(18) -0.0226(19) 
C15 0.0315(17) 0.051(2) 0.097(3) 0.0007(19) -0.0034(17) -0.0078(16) 
C16 0.0341(16) 0.0330(16) 0.0355(17) -0.0028(12) -0.0013(12) -0.0156(13) 
C17 0.0405(17) 0.0388(18) 0.053(2) 0.0021(14) -0.0046(14) -0.0191(15) 
C18 0.064(2) 0.064(2) 0.044(2) -0.0004(16) -0.0009(16) -0.0380(19) 
C19 0.091(3) 0.088(3) 0.066(3) 0.016(2) 0.007(2) -0.050(3) 
C20 0.100(3) 0.096(3) 0.124(4) -0.005(3) 0.025(3) -0.068(3) 
C21 0.0257(15) 0.0375(17) 0.0371(17) -0.0047(13) 0.0004(12) -0.0132(13) 
C22 0.0321(16) 0.0458(18) 0.061(2) -0.0031(15) -0.0048(14) -0.0206(15) 
C23 0.061(2) 0.065(2) 0.067(2) -0.0120(18) -0.0120(17) -0.0345(19) 
C24 0.0244(15) 0.0343(17) 0.0397(17) -0.0062(13) -0.0006(12) -0.0100(13) 
C25 0.0324(16) 0.0437(18) 0.057(2) 0.0016(15) -0.0066(14) -0.0134(15) 
C26 0.057(2) 0.071(2) 0.062(2) 0.0151(18) -0.0239(18) -0.0206(19) 
B3 0.043(2) 0.044(2) 0.038(2) -0.0083(16) -0.0027(15) -0.0195(17) 
B4 0.048(2) 0.034(2) 0.059(3) -0.0090(17) -0.0020(17) -0.0185(18) 
B5 0.046(2) 0.036(2) 0.054(2) 0.0074(16) -0.0048(17) -0.0198(17) 
B6 0.0381(19) 0.043(2) 0.034(2) 0.0005(15) 0.0012(15) -0.0131(17) 
B7 0.040(2) 0.048(2) 0.067(3) -0.0030(19) -0.0123(18) -0.0254(18) 
B8 0.058(2) 0.054(2) 0.064(3) -0.010(2) -0.008(2) -0.033(2) 
B9 0.057(2) 0.044(2) 0.077(3) -0.002(2) -0.007(2) -0.030(2) 
B10 0.051(2) 0.051(2) 0.060(3) 0.0080(19) 0.0045(19) -0.029(2) 
B11 0.0357(19) 0.049(2) 0.057(2) 0.0005(18) 0.0039(16) -0.0239(18) 
B12 0.047(2) 0.052(2) 0.081(3) 0.000(2) -0.006(2) -0.031(2) 
 
_geom_special_details 
; 
 All esds (except the esd in the dihedral angle between two l.s. planes) 
 are estimated using the full covariance matrix.  The cell esds are taken 
 into account individually in the estimation of esds in distances, angles 
 and torsion angles; correlations between esds in cell parameters are only 
 used when they are defined by crystal symmetry.  An approximate (isotropic) 
 treatment of cell esds is used for estimating esds involving l.s. planes. 
; 
 
loop_ 
 _geom_bond_atom_site_label_1 
 _geom_bond_atom_site_label_2 
 _geom_bond_distance 
 _geom_bond_site_symmetry_2 
 _geom_bond_publ_flag 
C1 C24 1.484(4) . ? 
C1 C2 1.673(4) . ? 
C1 B5 1.712(4) . ? 
C1 B4 1.712(4) . ? 
C1 B3 1.718(4) . ? 
C1 B6 1.737(4) . ? 
C2 C11 1.520(4) . ? 
C2 B7 1.735(4) . ? 
C2 B6 1.742(4) . ? 
C2 B11 1.745(4) . ? 
C2 B3 1.752(4) . ? 
C11 C16 1.366(4) . ? 
C11 C12 1.562(4) . ? 
C12 C14 1.537(4) . ? 
C12 C15 1.542(4) . ? 
C12 C13 1.548(4) . ? 
C16 C21 1.475(4) . ? 
C16 C17 1.521(4) . ? 
C17 C18 1.529(4) . ? 
C18 C19 1.517(4) . ? 
C19 C20 1.500(5) . ? 
C21 C24 1.341(3) . ? 
C21 C22 1.528(3) . ? 
C22 C23 1.522(4) . ? 
C24 C25 1.511(4) . ? 
C25 C26 1.521(4) . ? 
B3 B8 1.756(5) . ? 
B3 B7 1.760(5) . ? 
B3 B4 1.765(5) . ? 
B4 B9 1.759(5) . ? 
B4 B8 1.758(5) . ? 
B4 B5 1.769(5) . ? 
B5 B10 1.753(5) . ? 
B5 B9 1.757(5) . ? 
B5 B6 1.776(5) . ? 
B6 B11 1.755(5) . ? 
B6 B10 1.767(5) . ? 
B7 B12 1.763(5) . ? 
B7 B8 1.772(5) . ? 
B7 B11 1.794(5) . ? 
B8 B9 1.765(6) . ? 
B8 B12 1.775(6) . ? 
B9 B12 1.760(5) . ? 
B9 B10 1.769(6) . ? 
B10 B11 1.751(5) . ? 
B10 B12 1.772(6) . ? 
B11 B12 1.764(5) . ? 
 
loop_ 
 _geom_angle_atom_site_label_1 
 _geom_angle_atom_site_label_2 
 _geom_angle_atom_site_label_3 
 _geom_angle 
 _geom_angle_site_symmetry_1 
 _geom_angle_site_symmetry_3 
 _geom_angle_publ_flag 
C24 C1 C2 116.6(2) . . ? 
C24 C1 B5 120.5(2) . . ? 
C2 C1 B5 111.3(2) . . ? 
C24 C1 B4 122.8(2) . . ? 
C2 C1 B4 112.1(2) . . ? 
B5 C1 B4 62.21(19) . . ? 
C24 C1 B3 119.4(2) . . ? 
C2 C1 B3 62.20(17) . . ? 
B5 C1 B3 113.0(2) . . ? 
B4 C1 B3 61.92(19) . . ? 
C24 C1 B6 115.0(2) . . ? 
C2 C1 B6 61.39(17) . . ? 
B5 C1 B6 62.00(19) . . ? 
B4 C1 B6 113.6(2) . . ? 
B3 C1 B6 113.7(2) . . ? 
C11 C2 C1 115.7(2) . . ? 
C11 C2 B7 121.8(2) . . ? 
C1 C2 B7 108.0(2) . . ? 
C11 C2 B6 122.5(2) . . ? 
C1 C2 B6 61.10(16) . . ? 
B7 C2 B6 111.4(2) . . ? 
C11 C2 B11 129.4(2) . . ? 
C1 C2 B11 108.0(2) . . ? 
B7 C2 B11 62.06(19) . . ? 
B6 C2 B11 60.43(18) . . ? 
C11 C2 B3 112.1(2) . . ? 
C1 C2 B3 60.15(17) . . ? 
B7 C2 B3 60.61(18) . . ? 
B6 C2 B3 111.8(2) . . ? 
B11 C2 B3 111.0(2) . . ? 
C16 C11 C2 117.3(2) . . ? 
C16 C11 C12 121.2(2) . . ? 
C2 C11 C12 121.2(2) . . ? 
C14 C12 C15 105.3(3) . . ? 
C14 C12 C13 112.7(3) . . ? 
C15 C12 C13 102.6(2) . . ? 
C14 C12 C11 110.2(2) . . ? 
C15 C12 C11 116.7(2) . . ? 
C13 C12 C11 109.3(2) . . ? 
C11 C16 C21 123.9(2) . . ? 
C11 C16 C17 122.9(2) . . ? 
C21 C16 C17 112.9(2) . . ? 
C16 C17 C18 109.8(2) . . ? 
C19 C18 C17 113.6(3) . . ? 
C20 C19 C18 114.6(3) . . ? 
C24 C21 C16 123.6(2) . . ? 
C24 C21 C22 119.6(2) . . ? 
C16 C21 C22 116.4(2) . . ? 
C23 C22 C21 111.4(2) . . ? 
C21 C24 C1 119.4(2) . . ? 
C21 C24 C25 124.6(2) . . ? 
C1 C24 C25 115.9(2) . . ? 
C24 C25 C26 115.3(2) . . ? 
C1 B3 C2 57.65(16) . . ? 
C1 B3 B8 105.4(2) . . ? 
C2 B3 B8 106.7(2) . . ? 
C1 B3 B7 104.9(2) . . ? 
C2 B3 B7 59.22(17) . . ? 
B8 B3 B7 60.5(2) . . ? 
C1 B3 B4 58.87(18) . . ? 
C2 B3 B4 105.9(2) . . ? 
B8 B3 B4 59.9(2) . . ? 
B7 B3 B4 108.0(3) . . ? 
C1 B4 B9 105.1(2) . . ? 
C1 B4 B8 105.5(2) . . ? 
B9 B4 B8 60.2(2) . . ? 
C1 B4 B3 59.20(17) . . ? 
B9 B4 B3 107.9(3) . . ? 
B8 B4 B3 59.8(2) . . ? 
C1 B4 B5 58.89(18) . . ? 
B9 B4 B5 59.7(2) . . ? 
B8 B4 B5 108.1(3) . . ? 
B3 B4 B5 108.1(2) . . ? 
C1 B5 B10 105.9(2) . . ? 
C1 B5 B9 105.2(3) . . ? 
B10 B5 B9 60.5(2) . . ? 
C1 B5 B4 58.90(18) . . ? 
B10 B5 B4 108.6(3) . . ? 
B9 B5 B4 59.8(2) . . ? 
C1 B5 B6 59.69(18) . . ? 
B10 B5 B6 60.1(2) . . ? 
B9 B5 B6 108.6(3) . . ? 
B4 B5 B6 108.9(2) . . ? 
C1 B6 C2 57.51(16) . . ? 
C1 B6 B11 104.8(2) . . ? 
C2 B6 B11 59.88(18) . . ? 
C1 B6 B10 104.3(2) . . ? 
C2 B6 B10 106.1(2) . . ? 
B11 B6 B10 59.6(2) . . ? 
C1 B6 B5 58.31(17) . . ? 
C2 B6 B5 105.2(2) . . ? 
B11 B6 B5 106.9(3) . . ? 
B10 B6 B5 59.3(2) . . ? 
C2 B7 B3 60.17(17) . . ? 
C2 B7 B12 106.1(3) . . ? 
B3 B7 B12 108.0(3) . . ? 
C2 B7 B8 106.7(2) . . ? 
B3 B7 B8 59.61(19) . . ? 
B12 B7 B8 60.3(2) . . ? 
C2 B7 B11 59.24(18) . . ? 
B3 B7 B11 108.4(2) . . ? 
B12 B7 B11 59.4(2) . . ? 
B8 B7 B11 107.8(3) . . ? 
B3 B8 B4 60.29(19) . . ? 
B3 B8 B9 108.0(3) . . ? 
B4 B8 B9 59.9(2) . . ? 
B3 B8 B7 59.84(19) . . ? 
B4 B8 B7 107.8(2) . . ? 
B9 B8 B7 107.3(3) . . ? 
B3 B8 B12 107.6(3) . . ? 
B4 B8 B12 107.5(3) . . ? 
B9 B8 B12 59.6(2) . . ? 
B7 B8 B12 59.6(2) . . ? 
B5 B9 B4 60.4(2) . . ? 
B5 B9 B12 107.8(3) . . ? 
B4 B9 B12 108.2(3) . . ? 
B5 B9 B8 108.3(3) . . ? 
B4 B9 B8 59.9(2) . . ? 
B12 B9 B8 60.5(2) . . ? 
B5 B9 B10 59.6(2) . . ? 
B4 B9 B10 108.4(2) . . ? 
B12 B9 B10 60.3(2) . . ? 
B8 B9 B10 109.0(3) . . ? 
B11 B10 B5 108.1(2) . . ? 
B11 B10 B6 59.85(19) . . ? 
B5 B10 B6 60.61(19) . . ? 
B11 B10 B9 108.0(3) . . ? 
B5 B10 B9 59.8(2) . . ? 
B6 B10 B9 108.5(2) . . ? 
B11 B10 B12 60.1(2) . . ? 
B5 B10 B12 107.4(3) . . ? 
B6 B10 B12 108.0(3) . . ? 
B9 B10 B12 59.6(2) . . ? 
C2 B11 B10 106.6(2) . . ? 
C2 B11 B6 59.69(17) . . ? 
B10 B11 B6 60.5(2) . . ? 
C2 B11 B12 105.7(2) . . ? 
B10 B11 B12 60.6(2) . . ? 
B6 B11 B12 108.9(3) . . ? 
C2 B11 B7 58.70(18) . . ? 
B10 B11 B7 107.9(3) . . ? 
B6 B11 B7 108.1(2) . . ? 
B12 B11 B7 59.4(2) . . ? 
B9 B12 B7 107.9(3) . . ? 
B9 B12 B11 107.8(3) . . ? 
B7 B12 B11 61.1(2) . . ? 
B9 B12 B8 59.9(2) . . ? 
B7 B12 B8 60.1(2) . . ? 
B11 B12 B8 109.0(3) . . ? 
B9 B12 B10 60.1(2) . . ? 
B7 B12 B10 108.4(3) . . ? 
B11 B12 B10 59.3(2) . . ? 
B8 B12 B10 108.3(3) . . ? 
 
_diffrn_measured_fraction_theta_max    0.995 
_diffrn_reflns_theta_full              25.00 
_diffrn_measured_fraction_theta_full   0.995 
_refine_diff_density_max    0.205 
_refine_diff_density_min   -0.219 
_refine_diff_density_rms    0.043 
#===END


data_3m
 
_audit_creation_method            SHELXL-97 
_chemical_name_systematic 
; 
 ? 
; 
_chemical_name_common             ? 
_chemical_melting_point           ? 
_chemical_formula_moiety          ? 
_chemical_formula_sum 
 'C18 H30 B10 O' 
_chemical_formula_weight          370.52 
 
loop_ 
 _atom_type_symbol 
 _atom_type_description 
 _atom_type_scat_dispersion_real 
 _atom_type_scat_dispersion_imag 
 _atom_type_scat_source 
 'C'  'C'   0.0033   0.0016 
 'International Tables Vol C Tables 4.2.6.8 and 6.1.1.4' 
 'H'  'H'   0.0000   0.0000 
 'International Tables Vol C Tables 4.2.6.8 and 6.1.1.4' 
 'B'  'B'   0.0013   0.0007 
 'International Tables Vol C Tables 4.2.6.8 and 6.1.1.4' 
 'O'  'O'   0.0106   0.0060 
 'International Tables Vol C Tables 4.2.6.8 and 6.1.1.4' 
 
_symmetry_cell_setting            Monoclinic 
_symmetry_space_group_name_H-M    P2(1)/c 
 
loop_ 
 _symmetry_equiv_pos_as_xyz 
 'x, y, z' 
 '-x, y+1/2, -z+1/2' 
 '-x, -y, -z' 
 'x, -y-1/2, z-1/2' 
 
_cell_length_a                    11.3370(19) 
_cell_length_b                    10.6235(18) 
_cell_length_c                    19.108(3) 
_cell_angle_alpha                 90.00 
_cell_angle_beta                  106.542(3) 
_cell_angle_gamma                 90.00 
_cell_volume                      2206.0(6) 
_cell_formula_units_Z             4 
_cell_measurement_temperature     293(2) 
_cell_measurement_reflns_used     ? 
_cell_measurement_theta_min       ? 
_cell_measurement_theta_max       ? 
 
_exptl_crystal_description        block 
_exptl_crystal_colour             colourless 
_exptl_crystal_size_max           0.50 
_exptl_crystal_size_mid           0.40 
_exptl_crystal_size_min           0.30 
_exptl_crystal_density_meas       ? 
_exptl_crystal_density_diffrn     1.116 
_exptl_crystal_density_method     'not measured' 
_exptl_crystal_F_000              784 
_exptl_absorpt_coefficient_mu     0.059 
_exptl_absorpt_correction_type    multi-scan  
_exptl_absorpt_correction_T_min   0.5877  
_exptl_absorpt_correction_T_max   0.7456 
_exptl_absorpt_process_details    ? 
 
_exptl_special_details 
; 
 ? 
; 
 
_diffrn_ambient_temperature       293(2) 
_diffrn_radiation_wavelength      0.71073 
_diffrn_radiation_type            MoK\a 
_diffrn_radiation_source          'fine-focus sealed tube' 
_diffrn_radiation_monochromator   graphite 
_diffrn_measurement_device_type   'BRUKER SMART CCD DIFFRACTOMETER' 
_diffrn_measurement_method        'OMEGA SCAN' 
_diffrn_detector_area_resol_mean  ? 
_diffrn_reflns_number             11663 
_diffrn_reflns_av_R_equivalents   0.0420 
_diffrn_reflns_av_sigmaI/netI     0.0465 
_diffrn_reflns_limit_h_min        -13 
_diffrn_reflns_limit_h_max        13 
_diffrn_reflns_limit_k_min        -11 
_diffrn_reflns_limit_k_max        12 
_diffrn_reflns_limit_l_min        -22 
_diffrn_reflns_limit_l_max        22 
_diffrn_reflns_theta_min          1.87 
_diffrn_reflns_theta_max          25.00 
_reflns_number_total              3885 
_reflns_number_gt                 2617 
_reflns_threshold_expression      >2sigma(I) 
 
_computing_data_collection        'BRUKER SMART CCD DIFFRACTOMETER'  
_computing_cell_refinement        'BRUKER SMART CCD DIFFRACTOMETER'  
_computing_data_reduction         'BRUKER SMART CCD DIFFRACTOMETER'  
_computing_structure_solution     'SHELXS-97 (Sheldrick, 2008)' 
_computing_structure_refinement   'SHELXL-97 (Sheldrick, 2008)' 
_computing_molecular_graphics     'SIEMENS SHELXTL' 
_computing_publication_material   'SIEMENS SHELXTL'  
 
_refine_special_details 
; 
 Refinement of F^2^ against ALL reflections.  The weighted R-factor wR and 
 goodness of fit S are based on F^2^, conventional R-factors R are based 
 on F, with F set to zero for negative F^2^. The threshold expression of 
 F^2^ > 2sigma(F^2^) is used only for calculating R-factors(gt) etc. and is 
 not relevant to the choice of reflections for refinement.  R-factors based 
 on F^2^ are statistically about twice as large as those based on F, and R- 
 factors based on ALL data will be even larger. 
; 
 
_refine_ls_structure_factor_coef  Fsqd  
_refine_ls_matrix_type            full 
_refine_ls_weighting_scheme       calc  
_refine_ls_weighting_details 
 'calc w=1/[\s^2^(Fo^2^)+(0.0735P)^2^+0.6853P] where P=(Fo^2^+2Fc^2^)/3' 
_atom_sites_solution_primary      direct 
_atom_sites_solution_secondary    difmap 
_atom_sites_solution_hydrogens    geom 
_refine_ls_hydrogen_treatment     riding
_refine_ls_extinction_method      none 
_refine_ls_extinction_coef        ? 
_refine_ls_number_reflns          3885 
_refine_ls_number_parameters      262 
_refine_ls_number_restraints      0 
_refine_ls_R_factor_all           0.0816 
_refine_ls_R_factor_gt            0.0524 
_refine_ls_wR_factor_ref          0.1603 
_refine_ls_wR_factor_gt           0.1329 
_refine_ls_goodness_of_fit_ref    1.026 
_refine_ls_restrained_S_all       1.026 
_refine_ls_shift/su_max           0.004 
_refine_ls_shift/su_mean          0.001 
 
loop_ 
 _atom_site_label 
 _atom_site_type_symbol 
 _atom_site_fract_x 
 _atom_site_fract_y 
 _atom_site_fract_z 
 _atom_site_U_iso_or_equiv 
 _atom_site_adp_type 
 _atom_site_occupancy 
 _atom_site_symmetry_multiplicity 
 _atom_site_calc_flag 
 _atom_site_refinement_flags 
 _atom_site_disorder_assembly 
 _atom_site_disorder_group 
O1 O 0.61867(14) 0.35781(16) 0.38134(9) 0.0697(5) Uani 1 1 d . . . 
C1 C 0.17489(17) 0.31266(19) 0.23606(10) 0.0413(5) Uani 1 1 d . . . 
C2 C 0.28002(16) 0.30313(18) 0.19203(10) 0.0374(5) Uani 1 1 d . . . 
C11 C 0.40733(17) 0.27386(18) 0.23730(10) 0.0398(5) Uani 1 1 d . . . 
C12 C 0.50237(17) 0.2623(2) 0.19731(11) 0.0436(5) Uani 1 1 d . . . 
C13 C 0.50874(19) 0.1546(2) 0.15724(11) 0.0503(5) Uani 1 1 d . . . 
H13A H 0.4528 0.0895 0.1547 0.060 Uiso 1 1 calc R . . 
C14 C 0.5981(2) 0.1438(3) 0.12103(13) 0.0658(7) Uani 1 1 d . . . 
H14A H 0.6015 0.0720 0.0939 0.079 Uiso 1 1 calc R . . 
C15 C 0.6815(2) 0.2386(3) 0.12509(16) 0.0781(9) Uani 1 1 d . . . 
H15A H 0.7416 0.2310 0.1008 0.094 Uiso 1 1 calc R . . 
C16 C 0.6768(2) 0.3447(3) 0.16484(17) 0.0782(8) Uani 1 1 d . . . 
H16A H 0.7343 0.4084 0.1679 0.094 Uiso 1 1 calc R . . 
C17 C 0.5870(2) 0.3577(2) 0.20040(13) 0.0620(6) Uani 1 1 d . . . 
H17A H 0.5835 0.4308 0.2265 0.074 Uiso 1 1 calc R . . 
C18 C 0.43342(18) 0.26275(19) 0.31042(11) 0.0437(5) Uani 1 1 d . . . 
C19 C 0.5663(2) 0.2404(2) 0.35349(12) 0.0535(6) Uani 1 1 d . . . 
H19A H 0.5703 0.1824 0.3933 0.064 Uiso 1 1 calc R . . 
H19B H 0.6113 0.2041 0.3222 0.064 Uiso 1 1 calc R . . 
C20 C 0.7448(3) 0.3467(3) 0.4195(2) 0.1051(12) Uani 1 1 d . . . 
H20A H 0.7768 0.4278 0.4375 0.158 Uiso 1 1 calc R . . 
H20B H 0.7889 0.3151 0.3871 0.158 Uiso 1 1 calc R . . 
H20C H 0.7545 0.2897 0.4597 0.158 Uiso 1 1 calc R . . 
C21 C 0.3400(2) 0.2719(2) 0.35002(11) 0.0486(5) Uani 1 1 d . . . 
C22 C 0.3843(2) 0.2565(3) 0.43287(12) 0.0661(7) Uani 1 1 d . . . 
H22A H 0.4659 0.2928 0.4508 0.079 Uiso 1 1 calc R . . 
H22B H 0.3299 0.3033 0.4544 0.079 Uiso 1 1 calc R . . 
C23 C 0.3889(3) 0.1211(3) 0.45774(16) 0.0938(10) Uani 1 1 d . . . 
H23A H 0.4165 0.1179 0.5101 0.141 Uiso 1 1 calc R . . 
H23B H 0.4448 0.0747 0.4381 0.141 Uiso 1 1 calc R . . 
H23C H 0.3082 0.0847 0.4408 0.141 Uiso 1 1 calc R . . 
C24 C 0.21986(19) 0.29043(19) 0.31672(11) 0.0455(5) Uani 1 1 d . . . 
C25 C 0.1219(2) 0.2918(2) 0.35692(13) 0.0637(7) Uani 1 1 d . . . 
H25A H 0.0433 0.2701 0.3228 0.076 Uiso 1 1 calc R . . 
H25B H 0.1414 0.2274 0.3944 0.076 Uiso 1 1 calc R . . 
C26 C 0.1088(3) 0.4171(3) 0.39227(16) 0.0880(9) Uani 1 1 d . . . 
H26A H 0.0455 0.4108 0.4164 0.132 Uiso 1 1 calc R . . 
H26B H 0.0872 0.4813 0.3555 0.132 Uiso 1 1 calc R . . 
H26C H 0.1853 0.4385 0.4273 0.132 Uiso 1 1 calc R . . 
B3 B 0.1704(2) 0.1849(2) 0.17819(13) 0.0453(6) Uani 1 1 d . . . 
H3 H 0.1896 0.0870 0.1965 0.054 Uiso 1 1 calc R . . 
B4 B 0.0347(2) 0.2637(3) 0.18073(14) 0.0519(7) Uani 1 1 d . . . 
H4 H -0.0352 0.2159 0.2010 0.062 Uiso 1 1 calc R . . 
B5 B 0.0677(2) 0.4257(3) 0.19759(14) 0.0515(6) Uani 1 1 d . . . 
H5 H 0.0190 0.4826 0.2287 0.062 Uiso 1 1 calc R . . 
B6 B 0.2250(2) 0.4512(2) 0.20573(13) 0.0445(6) Uani 1 1 d . . . 
H6 H 0.2791 0.5243 0.2417 0.053 Uiso 1 1 calc R . . 
B7 B 0.2168(2) 0.2477(2) 0.10455(13) 0.0456(6) Uani 1 1 d . . . 
H7 H 0.2665 0.1897 0.0745 0.055 Uiso 1 1 calc R . . 
B8 B 0.0592(2) 0.2250(3) 0.09621(14) 0.0527(7) Uani 1 1 d . . . 
H8 H 0.0045 0.1523 0.0602 0.063 Uiso 1 1 calc R . . 
B9 B -0.0045(2) 0.3732(3) 0.10796(15) 0.0537(7) Uani 1 1 d . . . 
H9 H -0.1008 0.3969 0.0798 0.064 Uiso 1 1 calc R . . 
B10 B 0.1138(2) 0.4881(2) 0.12335(13) 0.0513(6) Uani 1 1 d . . . 
H10 H 0.0948 0.5861 0.1050 0.062 Uiso 1 1 calc R . . 
B11 B 0.2515(2) 0.4104(2) 0.12189(12) 0.0448(6) Uani 1 1 d . . . 
H11 H 0.3240 0.4570 0.1034 0.054 Uiso 1 1 calc R . . 
B12 B 0.1090(2) 0.3635(2) 0.06080(14) 0.0500(6) Uani 1 1 d . . . 
H12 H 0.0873 0.3807 0.0017 0.060 Uiso 1 1 calc R . . 
 
loop_ 
 _atom_site_aniso_label 
 _atom_site_aniso_U_11 
 _atom_site_aniso_U_22 
 _atom_site_aniso_U_33 
 _atom_site_aniso_U_23 
 _atom_site_aniso_U_13 
 _atom_site_aniso_U_12 
O1 0.0522(9) 0.0733(11) 0.0667(11) -0.0105(9) -0.0102(8) 0.0112(8) 
C1 0.0385(10) 0.0479(12) 0.0382(11) 0.0060(9) 0.0122(9) 0.0046(9) 
C2 0.0361(10) 0.0453(11) 0.0300(10) 0.0028(8) 0.0081(8) 0.0010(8) 
C11 0.0367(10) 0.0451(11) 0.0353(11) -0.0005(8) 0.0066(8) 0.0044(8) 
C12 0.0355(10) 0.0590(13) 0.0332(11) 0.0058(9) 0.0049(8) 0.0060(9) 
C13 0.0445(12) 0.0639(14) 0.0406(12) 0.0032(10) 0.0092(10) 0.0103(10) 
C14 0.0584(15) 0.0910(19) 0.0479(15) 0.0002(13) 0.0151(12) 0.0254(14) 
C15 0.0472(15) 0.129(3) 0.0631(18) 0.0149(18) 0.0233(13) 0.0122(16) 
C16 0.0502(15) 0.106(2) 0.081(2) 0.0102(17) 0.0230(14) -0.0131(15) 
C17 0.0462(13) 0.0762(16) 0.0611(16) -0.0009(13) 0.0113(11) -0.0070(12) 
C18 0.0447(11) 0.0492(12) 0.0338(11) 0.0019(9) 0.0057(9) 0.0121(9) 
C19 0.0528(13) 0.0631(14) 0.0390(12) 0.0026(10) 0.0037(10) 0.0184(11) 
C20 0.0615(18) 0.113(3) 0.110(3) -0.011(2) -0.0255(17) 0.0059(17) 
C21 0.0562(13) 0.0555(13) 0.0323(11) 0.0039(9) 0.0098(10) 0.0148(10) 
C22 0.0732(16) 0.0889(18) 0.0352(13) 0.0081(12) 0.0137(11) 0.0286(14) 
C23 0.117(2) 0.108(2) 0.0610(18) 0.0371(17) 0.0332(17) 0.0398(19) 
C24 0.0521(13) 0.0507(12) 0.0358(12) 0.0075(9) 0.0156(10) 0.0096(10) 
C25 0.0664(15) 0.0801(17) 0.0506(14) 0.0140(12) 0.0265(12) 0.0142(13) 
C26 0.101(2) 0.104(2) 0.0702(19) 0.0087(16) 0.0430(17) 0.0418(18) 
B3 0.0472(13) 0.0434(13) 0.0420(14) 0.0034(10) 0.0071(11) -0.0037(10) 
B4 0.0377(13) 0.0628(16) 0.0524(16) 0.0114(12) 0.0085(11) -0.0024(11) 
B5 0.0426(13) 0.0624(16) 0.0488(15) 0.0100(12) 0.0116(11) 0.0143(11) 
B6 0.0478(13) 0.0429(13) 0.0399(13) 0.0046(10) 0.0081(11) 0.0018(10) 
B7 0.0445(13) 0.0556(14) 0.0322(12) -0.0015(11) 0.0039(10) 0.0002(11) 
B8 0.0449(14) 0.0601(16) 0.0461(15) 0.0016(12) 0.0014(11) -0.0100(12) 
B9 0.0374(13) 0.0671(17) 0.0503(15) 0.0133(13) 0.0025(11) 0.0031(11) 
B10 0.0488(14) 0.0510(14) 0.0471(15) 0.0134(12) 0.0025(11) 0.0042(11) 
B11 0.0425(13) 0.0542(14) 0.0342(13) 0.0114(10) 0.0053(10) -0.0036(11) 
B12 0.0447(13) 0.0622(16) 0.0365(13) 0.0099(11) 0.0010(11) -0.0008(11) 
 
_geom_special_details 
; 
 All esds (except the esd in the dihedral angle between two l.s. planes) 
 are estimated using the full covariance matrix.  The cell esds are taken 
 into account individually in the estimation of esds in distances, angles 
 and torsion angles; correlations between esds in cell parameters are only 
 used when they are defined by crystal symmetry.  An approximate (isotropic) 
 treatment of cell esds is used for estimating esds involving l.s. planes. 
; 
 
loop_ 
 _geom_bond_atom_site_label_1 
 _geom_bond_atom_site_label_2 
 _geom_bond_distance 
 _geom_bond_site_symmetry_2 
 _geom_bond_publ_flag 
O1 C20 1.413(3) . ? 
O1 C19 1.418(3) . ? 
C1 C24 1.498(3) . ? 
C1 C2 1.646(3) . ? 
C1 B5 1.717(3) . ? 
C1 B4 1.719(3) . ? 
C1 B6 1.736(3) . ? 
C1 B3 1.742(3) . ? 
C2 C11 1.489(3) . ? 
C2 B11 1.718(3) . ? 
C2 B7 1.724(3) . ? 
C2 B3 1.733(3) . ? 
C2 B6 1.739(3) . ? 
C11 C18 1.348(3) . ? 
C11 C12 1.493(3) . ? 
C12 C17 1.386(3) . ? 
C12 C13 1.390(3) . ? 
C13 C14 1.385(3) . ? 
C14 C15 1.368(4) . ? 
C15 C16 1.368(4) . ? 
C16 C17 1.381(4) . ? 
C18 C21 1.470(3) . ? 
C18 C19 1.515(3) . ? 
C21 C24 1.344(3) . ? 
C21 C22 1.527(3) . ? 
C22 C23 1.512(4) . ? 
C24 C25 1.520(3) . ? 
C25 C26 1.519(4) . ? 
B3 B8 1.761(3) . ? 
B3 B4 1.763(4) . ? 
B3 B7 1.767(3) . ? 
B4 B8 1.763(4) . ? 
B4 B9 1.770(4) . ? 
B4 B5 1.772(4) . ? 
B5 B9 1.766(4) . ? 
B5 B6 1.766(3) . ? 
B5 B10 1.774(4) . ? 
B6 B10 1.758(3) . ? 
B6 B11 1.766(3) . ? 
B7 B8 1.764(3) . ? 
B7 B12 1.767(3) . ? 
B7 B11 1.782(3) . ? 
B8 B9 1.773(4) . ? 
B8 B12 1.777(4) . ? 
B9 B12 1.772(4) . ? 
B9 B10 1.775(4) . ? 
B10 B12 1.775(4) . ? 
B10 B11 1.774(4) . ? 
B11 B12 1.774(3) . ? 
 
loop_ 
 _geom_angle_atom_site_label_1 
 _geom_angle_atom_site_label_2 
 _geom_angle_atom_site_label_3 
 _geom_angle 
 _geom_angle_site_symmetry_1 
 _geom_angle_site_symmetry_3 
 _geom_angle_publ_flag 
C20 O1 C19 112.0(2) . . ? 
C24 C1 C2 115.61(15) . . ? 
C24 C1 B5 122.87(17) . . ? 
C2 C1 B5 110.55(15) . . ? 
C24 C1 B4 124.69(17) . . ? 
C2 C1 B4 110.12(16) . . ? 
B5 C1 B4 62.05(14) . . ? 
C24 C1 B6 115.43(17) . . ? 
C2 C1 B6 61.84(12) . . ? 
B5 C1 B6 61.50(13) . . ? 
B4 C1 B6 112.61(15) . . ? 
C24 C1 B3 118.05(16) . . ? 
C2 C1 B3 61.46(12) . . ? 
B5 C1 B3 112.57(16) . . ? 
B4 C1 B3 61.25(14) . . ? 
B6 C1 B3 113.70(16) . . ? 
C11 C2 C1 116.05(15) . . ? 
C11 C2 B11 121.84(16) . . ? 
C1 C2 B11 110.81(15) . . ? 
C11 C2 B7 123.97(16) . . ? 
C1 C2 B7 110.77(15) . . ? 
B11 C2 B7 62.36(13) . . ? 
C11 C2 B3 118.15(16) . . ? 
C1 C2 B3 61.99(13) . . ? 
B11 C2 B3 113.20(15) . . ? 
B7 C2 B3 61.48(13) . . ? 
C11 C2 B6 115.55(15) . . ? 
C1 C2 B6 61.62(12) . . ? 
B11 C2 B6 61.43(13) . . ? 
B7 C2 B6 112.75(15) . . ? 
B3 C2 B6 113.95(15) . . ? 
C18 C11 C2 120.71(18) . . ? 
C18 C11 C12 123.08(17) . . ? 
C2 C11 C12 116.19(16) . . ? 
C17 C12 C13 118.8(2) . . ? 
C17 C12 C11 120.7(2) . . ? 
C13 C12 C11 120.53(19) . . ? 
C14 C13 C12 120.2(2) . . ? 
C15 C14 C13 120.2(3) . . ? 
C14 C15 C16 120.1(2) . . ? 
C15 C16 C17 120.4(3) . . ? 
C16 C17 C12 120.3(2) . . ? 
C11 C18 C21 123.37(18) . . ? 
C11 C18 C19 117.87(19) . . ? 
C21 C18 C19 118.76(18) . . ? 
O1 C19 C18 108.14(17) . . ? 
C24 C21 C18 123.21(18) . . ? 
C24 C21 C22 119.8(2) . . ? 
C18 C21 C22 116.99(19) . . ? 
C23 C22 C21 113.6(2) . . ? 
C21 C24 C1 120.84(18) . . ? 
C21 C24 C25 123.38(19) . . ? 
C1 C24 C25 115.77(18) . . ? 
C26 C25 C24 114.3(2) . . ? 
C2 B3 C1 56.55(11) . . ? 
C2 B3 B8 105.16(16) . . ? 
C1 B3 B8 105.12(17) . . ? 
C2 B3 B4 104.20(17) . . ? 
C1 B3 B4 58.75(13) . . ? 
B8 B3 B4 60.05(15) . . ? 
C2 B3 B7 59.01(12) . . ? 
C1 B3 B7 104.47(16) . . ? 
B8 B3 B7 60.02(14) . . ? 
B4 B3 B7 107.60(17) . . ? 
C1 B4 B8 105.95(17) . . ? 
C1 B4 B3 60.00(13) . . ? 
B8 B4 B3 59.89(14) . . ? 
C1 B4 B9 105.41(17) . . ? 
B8 B4 B9 60.25(15) . . ? 
B3 B4 B9 108.45(18) . . ? 
C1 B4 B5 58.92(13) . . ? 
B8 B4 B5 108.24(18) . . ? 
B3 B4 B5 108.97(17) . . ? 
B9 B4 B5 59.80(15) . . ? 
C1 B5 B9 105.70(18) . . ? 
C1 B5 B6 59.76(12) . . ? 
B9 B5 B6 108.18(18) . . ? 
C1 B5 B4 59.03(13) . . ? 
B9 B5 B4 60.06(15) . . ? 
B6 B5 B4 108.72(17) . . ? 
C1 B5 B10 105.68(17) . . ? 
B9 B5 B10 60.22(14) . . ? 
B6 B5 B10 59.56(13) . . ? 
B4 B5 B10 108.23(19) . . ? 
C1 B6 C2 56.54(11) . . ? 
C1 B6 B10 105.58(16) . . ? 
C2 B6 B10 105.28(17) . . ? 
C1 B6 B5 58.73(13) . . ? 
C2 B6 B5 104.13(16) . . ? 
B10 B6 B5 60.45(14) . . ? 
C1 B6 B11 104.53(16) . . ? 
C2 B6 B11 58.69(12) . . ? 
B10 B6 B11 60.44(14) . . ? 
B5 B6 B11 108.11(17) . . ? 
C2 B7 B8 105.39(17) . . ? 
C2 B7 B3 59.52(12) . . ? 
B8 B7 B3 59.81(14) . . ? 
C2 B7 B12 105.18(17) . . ? 
B8 B7 B12 60.44(14) . . ? 
B3 B7 B12 108.48(18) . . ? 
C2 B7 B11 58.66(12) . . ? 
B8 B7 B11 108.32(18) . . ? 
B3 B7 B11 108.55(17) . . ? 
B12 B7 B11 59.98(13) . . ? 
B3 B8 B4 60.06(14) . . ? 
B3 B8 B7 60.18(14) . . ? 
B4 B8 B7 107.73(17) . . ? 
B3 B8 B9 108.43(18) . . ? 
B4 B8 B9 60.06(15) . . ? 
B7 B8 B9 107.78(18) . . ? 
B3 B8 B12 108.30(17) . . ? 
B4 B8 B12 107.79(19) . . ? 
B7 B8 B12 59.85(14) . . ? 
B9 B8 B12 59.88(15) . . ? 
B5 B9 B4 60.14(15) . . ? 
B5 B9 B12 107.94(17) . . ? 
B4 B9 B12 107.72(17) . . ? 
B5 B9 B8 108.06(17) . . ? 
B4 B9 B8 59.69(15) . . ? 
B12 B9 B8 60.17(15) . . ? 
B5 B9 B10 60.12(15) . . ? 
B4 B9 B10 108.22(17) . . ? 
B12 B9 B10 60.03(14) . . ? 
B8 B9 B10 108.40(17) . . ? 
B6 B10 B12 108.26(17) . . ? 
B6 B10 B5 60.00(13) . . ? 
B12 B10 B5 107.47(18) . . ? 
B6 B10 B11 60.01(13) . . ? 
B12 B10 B11 60.00(14) . . ? 
B5 B10 B11 107.42(16) . . ? 
B6 B10 B9 108.09(17) . . ? 
B12 B10 B9 59.89(15) . . ? 
B5 B10 B9 59.66(15) . . ? 
B11 B10 B9 107.71(18) . . ? 
C2 B11 B6 59.88(12) . . ? 
C2 B11 B12 105.11(16) . . ? 
B6 B11 B12 107.91(17) . . ? 
C2 B11 B10 105.50(16) . . ? 
B6 B11 B10 59.55(13) . . ? 
B12 B11 B10 60.02(14) . . ? 
C2 B11 B7 58.98(12) . . ? 
B6 B11 B7 108.73(17) . . ? 
B12 B11 B7 59.57(13) . . ? 
B10 B11 B7 107.78(17) . . ? 
B7 B12 B9 107.74(18) . . ? 
B7 B12 B11 60.44(13) . . ? 
B9 B12 B11 107.84(18) . . ? 
B7 B12 B10 108.44(16) . . ? 
B9 B12 B10 60.08(15) . . ? 
B11 B12 B10 59.98(14) . . ? 
B7 B12 B8 59.71(14) . . ? 
B9 B12 B8 59.95(15) . . ? 
B11 B12 B8 108.10(16) . . ? 
B10 B12 B8 108.27(18) . . ? 
 
_diffrn_measured_fraction_theta_max    0.999 
_diffrn_reflns_theta_full              25.00 
_diffrn_measured_fraction_theta_full   0.999 
_refine_diff_density_max    0.239 
_refine_diff_density_min   -0.273 
_refine_diff_density_rms    0.044 
#===END


data_3n 
 
_audit_creation_method            SHELXL-97 
_chemical_name_systematic 
; 
 ? 
; 
_chemical_name_common             ? 
_chemical_melting_point           ? 
_chemical_formula_moiety          ? 
_chemical_formula_sum 
 'C19 H30 B10' 
_chemical_formula_weight          366.53 
 
loop_ 
 _atom_type_symbol 
 _atom_type_description 
 _atom_type_scat_dispersion_real 
 _atom_type_scat_dispersion_imag 
 _atom_type_scat_source 
 'C'  'C'   0.0033   0.0016 
 'International Tables Vol C Tables 4.2.6.8 and 6.1.1.4' 
 'H'  'H'   0.0000   0.0000 
 'International Tables Vol C Tables 4.2.6.8 and 6.1.1.4' 
 'B'  'B'   0.0013   0.0007 
 'International Tables Vol C Tables 4.2.6.8 and 6.1.1.4' 
 
_symmetry_cell_setting            Monoclinic 
_symmetry_space_group_name_H-M    P2(1)/c 
 
loop_ 
 _symmetry_equiv_pos_as_xyz 
 'x, y, z' 
 '-x, y+1/2, -z+1/2' 
 '-x, -y, -z' 
 'x, -y-1/2, z-1/2' 
 
_cell_length_a                    9.533(2) 
_cell_length_b                    18.412(4) 
_cell_length_c                    13.318(3) 
_cell_angle_alpha                 90.00 
_cell_angle_beta                  102.604(4) 
_cell_angle_gamma                 90.00 
_cell_volume                      2281.5(8) 
_cell_formula_units_Z             4 
_cell_measurement_temperature     296(2) 
_cell_measurement_reflns_used     ? 
_cell_measurement_theta_min       ? 
_cell_measurement_theta_max       ? 
 
_exptl_crystal_description        block 
_exptl_crystal_colour             colourless 
_exptl_crystal_size_max           0.40 
_exptl_crystal_size_mid           0.30 
_exptl_crystal_size_min           0.20 
_exptl_crystal_density_meas       ? 
_exptl_crystal_density_diffrn     1.067 
_exptl_crystal_density_method     'not measured' 
_exptl_crystal_F_000              776 
_exptl_absorpt_coefficient_mu     0.053 
_exptl_absorpt_correction_type    Multi-scan 
_exptl_absorpt_correction_T_min   0.697555 
_exptl_absorpt_correction_T_max   1.00000
_exptl_absorpt_process_details    ? 
 
_exptl_special_details 
; 
 ? 
; 
 
_diffrn_ambient_temperature       296(2) 
_diffrn_radiation_wavelength      0.71073 
_diffrn_radiation_type            MoK\a 
_diffrn_radiation_source          'fine-focus sealed tube' 
_diffrn_radiation_monochromator   graphite 
_diffrn_measurement_device_type   'BRUKER KAPPA APEXII DUO DIFFRACTOMETER' 
_diffrn_measurement_method        'OMEGA SCAN' 
_diffrn_detector_area_resol_mean  ? 
_diffrn_standards_number          ? 
_diffrn_standards_interval_count  ? 
_diffrn_standards_interval_time   ? 
_diffrn_standards_decay_%         ? 
_diffrn_reflns_number             28280 
_diffrn_reflns_av_R_equivalents   0.0494 
_diffrn_reflns_av_sigmaI/netI     0.0409 
_diffrn_reflns_limit_h_min        -11 
_diffrn_reflns_limit_h_max        12 
_diffrn_reflns_limit_k_min        -24 
_diffrn_reflns_limit_k_max        24 
_diffrn_reflns_limit_l_min        -17 
_diffrn_reflns_limit_l_max        17 
_diffrn_reflns_theta_min          1.92 
_diffrn_reflns_theta_max          27.96 
_reflns_number_total              5475 
_reflns_number_gt                 3112 
_reflns_threshold_expression      >2sigma(I) 
 
_computing_data_collection        'BRUKER KAPPA APEXII DUO DIFFRACTOMETER'  
_computing_cell_refinement        'BRUKER KAPPA APEXII DUO DIFFRACTOMETER'  
_computing_data_reduction         'BRUKER KAPPA APEXII DUO DIFFRACTOMETER'  
_computing_structure_solution     'SHELXS-97 (Sheldrick, 1990)' 
_computing_structure_refinement   'SHELXL-97 (Sheldrick, 1997)' 
_computing_molecular_graphics     'SIEMENS SHELXTL' 
_computing_publication_material   'SIEMENS SHELXTL'  
 
_refine_special_details 
; 
 Refinement of F^2^ against ALL reflections.  The weighted R-factor wR and 
 goodness of fit S are based on F^2^, conventional R-factors R are based 
 on F, with F set to zero for negative F^2^. The threshold expression of 
 F^2^ > 2sigma(F^2^) is used only for calculating R-factors(gt) etc. and is 
 not relevant to the choice of reflections for refinement.  R-factors based 
 on F^2^ are statistically about twice as large as those based on F, and R- 
 factors based on ALL data will be even larger. 
; 
 
_refine_ls_structure_factor_coef  Fsqd  
_refine_ls_matrix_type            full 
_refine_ls_weighting_scheme       calc  
_refine_ls_weighting_details 
 'calc w=1/[\s^2^(Fo^2^)+(0.0837P)^2^+0.2707P] where P=(Fo^2^+2Fc^2^)/3' 
_atom_sites_solution_primary      direct 
_atom_sites_solution_secondary    difmap 
_atom_sites_solution_hydrogens    geom 
_refine_ls_hydrogen_treatment     riding
_refine_ls_extinction_method      none 
_refine_ls_extinction_coef        ? 
_refine_ls_number_reflns          5475 
_refine_ls_number_parameters      262 
_refine_ls_number_restraints      0 
_refine_ls_R_factor_all           0.1104 
_refine_ls_R_factor_gt            0.0552 
_refine_ls_wR_factor_ref          0.1712 
_refine_ls_wR_factor_gt           0.1385 
_refine_ls_goodness_of_fit_ref    1.001 
_refine_ls_restrained_S_all       1.001 
_refine_ls_shift/su_max           0.006 
_refine_ls_shift/su_mean          0.001 
 
loop_ 
 _atom_site_label 
 _atom_site_type_symbol 
 _atom_site_fract_x 
 _atom_site_fract_y 
 _atom_site_fract_z 
 _atom_site_U_iso_or_equiv 
 _atom_site_adp_type 
 _atom_site_occupancy 
 _atom_site_symmetry_multiplicity 
 _atom_site_calc_flag 
 _atom_site_refinement_flags 
 _atom_site_disorder_assembly 
 _atom_site_disorder_group 
C1 C 0.49676(18) 0.15922(8) 0.84973(12) 0.0398(4) Uani 1 1 d . . . 
C2 C 0.36651(17) 0.21821(8) 0.84180(13) 0.0394(4) Uani 1 1 d . . . 
C11 C 0.41030(18) 0.29576(8) 0.84464(13) 0.0425(4) Uani 1 1 d . . . 
C12 C 0.29176(19) 0.35014(9) 0.83535(14) 0.0465(4) Uani 1 1 d . . . 
C13 C 0.2391(2) 0.37149(10) 0.91955(15) 0.0559(5) Uani 1 1 d . . . 
H13A H 0.2762 0.3510 0.9837 0.067 Uiso 1 1 calc R . . 
C14 C 0.1314(2) 0.42318(11) 0.90907(18) 0.0680(6) Uani 1 1 d . . . 
H14A H 0.0958 0.4370 0.9659 0.082 Uiso 1 1 calc R . . 
C15 C 0.0773(2) 0.45395(11) 0.8149(2) 0.0748(7) Uani 1 1 d . . . 
H15A H 0.0055 0.4889 0.8081 0.090 Uiso 1 1 calc R . . 
C16 C 0.1283(3) 0.43359(12) 0.73095(19) 0.0758(7) Uani 1 1 d . . . 
H16A H 0.0914 0.4548 0.6673 0.091 Uiso 1 1 calc R . . 
C17 C 0.2350(2) 0.38128(10) 0.74064(16) 0.0628(5) Uani 1 1 d . . . 
H17A H 0.2687 0.3670 0.6832 0.075 Uiso 1 1 calc R . . 
C18 C 0.54855(19) 0.31472(9) 0.85179(13) 0.0474(4) Uani 1 1 d . . . 
C19 C 0.5875(2) 0.39459(10) 0.85948(18) 0.0660(6) Uani 1 1 d . . . 
H19A H 0.6572 0.4038 0.8177 0.079 Uiso 1 1 calc R . . 
H19B H 0.5021 0.4227 0.8308 0.079 Uiso 1 1 calc R . . 
C20 C 0.6474(3) 0.42049(14) 0.9652(2) 0.0888(8) Uani 1 1 d . . . 
H20A H 0.6774 0.4687 0.9712 0.107 Uiso 1 1 calc R . . 
C21 C 0.6631(4) 0.38493(19) 1.0497(2) 0.1108(10) Uani 1 1 d . . . 
H21A H 0.6351 0.3365 1.0488 0.133 Uiso 1 1 calc R . . 
H21B H 0.7025 0.4076 1.1119 0.133 Uiso 1 1 calc R . . 
C22 C 0.66500(19) 0.26132(10) 0.85695(14) 0.0484(4) Uani 1 1 d . . . 
C23 C 0.8129(2) 0.28994(12) 0.85234(18) 0.0672(6) Uani 1 1 d . . . 
H23A H 0.8859 0.2564 0.8873 0.081 Uiso 1 1 calc R . . 
H23B H 0.8287 0.3364 0.8873 0.081 Uiso 1 1 calc R . . 
C24 C 0.8258(3) 0.29894(15) 0.7406(2) 0.0897(8) Uani 1 1 d . . . 
H24A H 0.9196 0.3172 0.7390 0.135 Uiso 1 1 calc R . . 
H24B H 0.7541 0.3325 0.7063 0.135 Uiso 1 1 calc R . . 
H24C H 0.8118 0.2528 0.7064 0.135 Uiso 1 1 calc R . . 
C25 C 0.64349(18) 0.18920(9) 0.85871(13) 0.0454(4) Uani 1 1 d . . . 
C26 C 0.7634(2) 0.13416(11) 0.86940(16) 0.0603(5) Uani 1 1 d . . . 
H26A H 0.8295 0.1495 0.8276 0.072 Uiso 1 1 calc R . . 
H26B H 0.7230 0.0878 0.8430 0.072 Uiso 1 1 calc R . . 
C27 C 0.8466(3) 0.12400(15) 0.97985(19) 0.0852(8) Uani 1 1 d . . . 
H27A H 0.9207 0.0884 0.9816 0.128 Uiso 1 1 calc R . . 
H27B H 0.7823 0.1078 1.0216 0.128 Uiso 1 1 calc R . . 
H27C H 0.8892 0.1693 1.0060 0.128 Uiso 1 1 calc R . . 
B3 B 0.3784(2) 0.17071(11) 0.73197(16) 0.0489(5) Uani 1 1 d . . . 
H3 H 0.4068 0.1948 0.6635 0.059 Uiso 1 1 calc R . . 
B4 B 0.4372(2) 0.08397(11) 0.77644(17) 0.0516(5) Uani 1 1 d . . . 
H4 H 0.5047 0.0513 0.7364 0.062 Uiso 1 1 calc R . . 
B5 B 0.4625(3) 0.08227(10) 0.91288(17) 0.0512(5) Uani 1 1 d . . . 
H5 H 0.5463 0.0485 0.9608 0.061 Uiso 1 1 calc R . . 
B6 B 0.4185(2) 0.16867(10) 0.95480(15) 0.0437(5) Uani 1 1 d . . . 
H6 H 0.4725 0.1915 1.0296 0.052 Uiso 1 1 calc R . . 
B7 B 0.2105(2) 0.18692(12) 0.76394(18) 0.0538(5) Uani 1 1 d . . . 
H7 H 0.1291 0.2220 0.7160 0.065 Uiso 1 1 calc R . . 
B8 B 0.2539(3) 0.09959(12) 0.72408(19) 0.0592(6) Uani 1 1 d . . . 
H8 H 0.1996 0.0765 0.6495 0.071 Uiso 1 1 calc R . . 
B9 B 0.3054(3) 0.04474(11) 0.83467(19) 0.0577(6) Uani 1 1 d . . . 
H9 H 0.2853 -0.0141 0.8323 0.069 Uiso 1 1 calc R . . 
B10 B 0.2936(3) 0.09732(11) 0.94379(18) 0.0542(6) Uani 1 1 d . . . 
H10 H 0.2653 0.0729 1.0121 0.065 Uiso 1 1 calc R . . 
B11 B 0.2351(2) 0.18525(11) 0.90003(17) 0.0498(5) Uani 1 1 d . . . 
H11 H 0.1693 0.2193 0.9398 0.060 Uiso 1 1 calc R . . 
B12 B 0.1646(3) 0.10860(12) 0.82652(19) 0.0577(6) Uani 1 1 d . . . 
H12 H 0.0520 0.0918 0.8186 0.069 Uiso 1 1 calc R . . 
 
loop_ 
 _atom_site_aniso_label 
 _atom_site_aniso_U_11 
 _atom_site_aniso_U_22 
 _atom_site_aniso_U_33 
 _atom_site_aniso_U_23 
 _atom_site_aniso_U_13 
 _atom_site_aniso_U_12 
C1 0.0463(9) 0.0319(8) 0.0451(9) 0.0016(7) 0.0185(7) 0.0005(7) 
C2 0.0403(9) 0.0321(8) 0.0482(9) -0.0005(7) 0.0149(7) -0.0007(6) 
C11 0.0490(10) 0.0322(8) 0.0458(9) 0.0030(7) 0.0094(8) -0.0030(7) 
C12 0.0518(11) 0.0324(8) 0.0523(10) 0.0020(7) 0.0049(8) -0.0015(7) 
C13 0.0634(13) 0.0448(10) 0.0534(11) -0.0043(8) -0.0001(9) 0.0097(9) 
C14 0.0701(14) 0.0539(12) 0.0746(14) -0.0119(11) 0.0041(11) 0.0179(10) 
C15 0.0664(14) 0.0477(12) 0.0987(18) -0.0003(12) -0.0076(13) 0.0161(10) 
C16 0.0830(17) 0.0549(12) 0.0763(16) 0.0199(11) -0.0118(13) 0.0090(11) 
C17 0.0752(14) 0.0512(11) 0.0584(12) 0.0101(9) 0.0070(10) 0.0037(10) 
C18 0.0518(11) 0.0389(9) 0.0520(11) 0.0056(8) 0.0122(8) -0.0077(8) 
C19 0.0673(13) 0.0406(10) 0.0903(16) 0.0045(10) 0.0176(12) -0.0151(9) 
C20 0.101(2) 0.0592(14) 0.109(2) -0.0227(14) 0.0281(17) -0.0303(13) 
C21 0.134(3) 0.112(2) 0.089(2) -0.0338(19) 0.0305(19) -0.039(2) 
C22 0.0440(10) 0.0509(10) 0.0525(10) 0.0031(8) 0.0151(8) -0.0088(8) 
C23 0.0480(12) 0.0698(13) 0.0869(16) 0.0016(12) 0.0217(11) -0.0152(10) 
C24 0.0860(18) 0.0915(18) 0.108(2) 0.0040(15) 0.0568(15) -0.0255(14) 
C25 0.0429(9) 0.0490(10) 0.0478(10) 0.0041(8) 0.0174(8) 0.0020(8) 
C26 0.0511(11) 0.0644(12) 0.0704(13) 0.0071(10) 0.0244(10) 0.0107(10) 
C27 0.0682(15) 0.107(2) 0.0815(17) 0.0257(15) 0.0178(13) 0.0239(14) 
B3 0.0564(13) 0.0467(11) 0.0457(11) -0.0053(9) 0.0156(10) -0.0083(9) 
B4 0.0633(14) 0.0377(10) 0.0621(13) -0.0116(9) 0.0315(11) -0.0061(9) 
B5 0.0666(14) 0.0324(9) 0.0622(13) 0.0068(9) 0.0306(11) 0.0016(9) 
B6 0.0561(12) 0.0368(9) 0.0444(11) 0.0005(8) 0.0244(9) -0.0017(8) 
B7 0.0459(12) 0.0492(12) 0.0645(14) -0.0049(10) 0.0080(10) -0.0070(9) 
B8 0.0665(15) 0.0536(13) 0.0615(14) -0.0170(11) 0.0225(12) -0.0216(11) 
B9 0.0712(15) 0.0372(10) 0.0753(15) -0.0099(10) 0.0394(12) -0.0125(10) 
B10 0.0688(15) 0.0408(11) 0.0641(14) -0.0028(9) 0.0387(12) -0.0094(10) 
B11 0.0482(12) 0.0397(10) 0.0701(14) -0.0088(10) 0.0314(10) -0.0057(9) 
B12 0.0544(13) 0.0472(12) 0.0780(16) -0.0147(11) 0.0289(12) -0.0158(10) 
 
_geom_special_details 
; 
 All esds (except the esd in the dihedral angle between two l.s. planes) 
 are estimated using the full covariance matrix.  The cell esds are taken 
 into account individually in the estimation of esds in distances, angles 
 and torsion angles; correlations between esds in cell parameters are only 
 used when they are defined by crystal symmetry.  An approximate (isotropic) 
 treatment of cell esds is used for estimating esds involving l.s. planes. 
; 
 
loop_ 
 _geom_bond_atom_site_label_1 
 _geom_bond_atom_site_label_2 
 _geom_bond_distance 
 _geom_bond_site_symmetry_2 
 _geom_bond_publ_flag 
C1 C25 1.484(2) . ? 
C1 C2 1.636(2) . ? 
C1 B5 1.715(2) . ? 
C1 B4 1.719(3) . ? 
C1 B6 1.732(2) . ? 
C1 B3 1.734(3) . ? 
C2 C11 1.486(2) . ? 
C2 B7 1.717(3) . ? 
C2 B11 1.722(2) . ? 
C2 B3 1.729(3) . ? 
C2 B6 1.737(3) . ? 
C11 C18 1.347(2) . ? 
C11 C12 1.495(2) . ? 
C12 C13 1.382(3) . ? 
C12 C17 1.384(3) . ? 
C13 C14 1.384(3) . ? 
C14 C15 1.370(3) . ? 
C15 C16 1.365(4) . ? 
C16 C17 1.386(3) . ? 
C18 C22 1.473(3) . ? 
C18 C19 1.515(2) . ? 
C19 C20 1.478(3) . ? 
C20 C21 1.282(4) . ? 
C22 C25 1.344(2) . ? 
C22 C23 1.519(2) . ? 
C23 C24 1.528(3) . ? 
C25 C26 1.511(2) . ? 
C26 C27 1.523(3) . ? 
B3 B4 1.752(3) . ? 
B3 B8 1.755(3) . ? 
B3 B7 1.769(3) . ? 
B4 B8 1.758(4) . ? 
B4 B9 1.768(3) . ? 
B4 B5 1.780(3) . ? 
B5 B6 1.766(3) . ? 
B5 B9 1.768(3) . ? 
B5 B10 1.769(3) . ? 
B6 B10 1.758(3) . ? 
B6 B11 1.768(3) . ? 
B7 B12 1.768(3) . ? 
B7 B8 1.770(3) . ? 
B7 B11 1.776(3) . ? 
B8 B9 1.765(4) . ? 
B8 B12 1.767(3) . ? 
B9 B10 1.770(3) . ? 
B9 B12 1.770(3) . ? 
B10 B11 1.769(3) . ? 
B10 B12 1.777(4) . ? 
B11 B12 1.765(3) . ? 
 
loop_ 
 _geom_angle_atom_site_label_1 
 _geom_angle_atom_site_label_2 
 _geom_angle_atom_site_label_3 
 _geom_angle 
 _geom_angle_site_symmetry_1 
 _geom_angle_site_symmetry_3 
 _geom_angle_publ_flag 
C25 C1 C2 116.56(13) . . ? 
C25 C1 B5 123.00(15) . . ? 
C2 C1 B5 110.92(13) . . ? 
C25 C1 B4 122.31(14) . . ? 
C2 C1 B4 110.28(14) . . ? 
B5 C1 B4 62.47(12) . . ? 
C25 C1 B6 117.52(14) . . ? 
C2 C1 B6 62.02(10) . . ? 
B5 C1 B6 61.65(11) . . ? 
B4 C1 B6 113.12(13) . . ? 
C25 C1 B3 116.34(14) . . ? 
C2 C1 B3 61.67(11) . . ? 
B5 C1 B3 112.85(14) . . ? 
B4 C1 B3 61.01(12) . . ? 
B6 C1 B3 114.11(14) . . ? 
C11 C2 C1 115.55(13) . . ? 
C11 C2 B7 122.65(15) . . ? 
C1 C2 B7 111.21(13) . . ? 
C11 C2 B11 123.74(14) . . ? 
C1 C2 B11 110.72(13) . . ? 
B7 C2 B11 62.21(12) . . ? 
C11 C2 B3 115.96(14) . . ? 
C1 C2 B3 61.96(11) . . ? 
B7 C2 B3 61.78(12) . . ? 
B11 C2 B3 113.02(13) . . ? 
C11 C2 B6 117.21(14) . . ? 
C1 C2 B6 61.72(10) . . ? 
B7 C2 B6 113.14(13) . . ? 
B11 C2 B6 61.50(12) . . ? 
B3 C2 B6 114.10(13) . . ? 
C18 C11 C2 121.08(15) . . ? 
C18 C11 C12 122.88(15) . . ? 
C2 C11 C12 116.01(14) . . ? 
C13 C12 C17 118.87(17) . . ? 
C13 C12 C11 121.69(16) . . ? 
C17 C12 C11 119.42(17) . . ? 
C12 C13 C14 120.42(19) . . ? 
C15 C14 C13 119.9(2) . . ? 
C16 C15 C14 120.4(2) . . ? 
C15 C16 C17 120.0(2) . . ? 
C12 C17 C16 120.4(2) . . ? 
C11 C18 C22 123.10(15) . . ? 
C11 C18 C19 118.57(17) . . ? 
C22 C18 C19 118.28(16) . . ? 
C20 C19 C18 114.55(19) . . ? 
C21 C20 C19 128.2(2) . . ? 
C25 C22 C18 122.93(16) . . ? 
C25 C22 C23 119.33(17) . . ? 
C18 C22 C23 117.59(16) . . ? 
C22 C23 C24 110.46(18) . . ? 
C22 C25 C1 120.70(15) . . ? 
C22 C25 C26 123.29(16) . . ? 
C1 C25 C26 116.01(15) . . ? 
C25 C26 C27 113.41(18) . . ? 
C2 B3 C1 56.37(10) . . ? 
C2 B3 B4 104.50(14) . . ? 
C1 B3 B4 59.07(11) . . ? 
C2 B3 B8 105.07(14) . . ? 
C1 B3 B8 105.15(15) . . ? 
B4 B3 B8 60.17(13) . . ? 
C2 B3 B7 58.77(11) . . ? 
C1 B3 B7 104.33(15) . . ? 
B4 B3 B7 108.18(15) . . ? 
B8 B3 B7 60.32(13) . . ? 
C1 B4 B3 59.92(11) . . ? 
C1 B4 B8 105.67(14) . . ? 
B3 B4 B8 59.98(13) . . ? 
C1 B4 B9 104.99(14) . . ? 
B3 B4 B9 108.36(16) . . ? 
B8 B4 B9 60.07(14) . . ? 
C1 B4 B5 58.67(11) . . ? 
B3 B4 B5 108.84(14) . . ? 
B8 B4 B5 108.02(15) . . ? 
B9 B4 B5 59.75(13) . . ? 
C1 B5 B6 59.66(10) . . ? 
C1 B5 B9 105.16(15) . . ? 
B6 B5 B9 108.02(16) . . ? 
C1 B5 B10 105.38(14) . . ? 
B6 B5 B10 59.63(11) . . ? 
B9 B5 B10 60.07(13) . . ? 
C1 B5 B4 58.86(11) . . ? 
B6 B5 B4 108.55(14) . . ? 
B9 B5 B4 59.78(12) . . ? 
B10 B5 B4 107.89(17) . . ? 
C1 B6 C2 56.26(9) . . ? 
C1 B6 B10 105.13(13) . . ? 
C2 B6 B10 105.08(15) . . ? 
C1 B6 B5 58.70(10) . . ? 
C2 B6 B5 103.98(13) . . ? 
B10 B6 B5 60.26(12) . . ? 
C1 B6 B11 104.21(14) . . ? 
C2 B6 B11 58.83(11) . . ? 
B10 B6 B11 60.23(12) . . ? 
B5 B6 B11 107.87(15) . . ? 
C2 B7 B12 105.07(16) . . ? 
C2 B7 B3 59.45(11) . . ? 
B12 B7 B3 107.81(16) . . ? 
C2 B7 B8 104.92(15) . . ? 
B12 B7 B8 59.91(12) . . ? 
B3 B7 B8 59.44(12) . . ? 
C2 B7 B11 59.03(11) . . ? 
B12 B7 B11 59.73(12) . . ? 
B3 B7 B11 108.53(15) . . ? 
B8 B7 B11 107.62(16) . . ? 
B3 B8 B4 59.85(12) . . ? 
B3 B8 B9 108.39(17) . . ? 
B4 B8 B9 60.25(13) . . ? 
B3 B8 B12 108.49(15) . . ? 
B4 B8 B12 108.30(17) . . ? 
B9 B8 B12 60.17(13) . . ? 
B3 B8 B7 60.24(12) . . ? 
B4 B8 B7 107.87(15) . . ? 
B9 B8 B7 108.07(16) . . ? 
B12 B8 B7 59.97(13) . . ? 
B8 B9 B5 108.29(15) . . ? 
B8 B9 B4 59.69(13) . . ? 
B5 B9 B4 60.47(12) . . ? 
B8 B9 B10 108.43(16) . . ? 
B5 B9 B10 60.01(13) . . ? 
B4 B9 B10 108.39(14) . . ? 
B8 B9 B12 59.96(14) . . ? 
B5 B9 B12 108.07(15) . . ? 
B4 B9 B12 107.68(15) . . ? 
B10 B9 B12 60.23(13) . . ? 
B6 B10 B5 60.11(11) . . ? 
B6 B10 B9 108.27(14) . . ? 
B5 B10 B9 59.92(13) . . ? 
B6 B10 B11 60.18(12) . . ? 
B5 B10 B11 107.70(14) . . ? 
B9 B10 B11 107.58(16) . . ? 
B6 B10 B12 108.20(15) . . ? 
B5 B10 B12 107.72(16) . . ? 
B9 B10 B12 59.88(13) . . ? 
B11 B10 B12 59.70(13) . . ? 
C2 B11 B12 104.98(14) . . ? 
C2 B11 B6 59.68(10) . . ? 
B12 B11 B6 108.26(15) . . ? 
C2 B11 B10 105.24(13) . . ? 
B12 B11 B10 60.36(13) . . ? 
B6 B11 B10 59.59(12) . . ? 
C2 B11 B7 58.75(11) . . ? 
B12 B11 B7 59.89(13) . . ? 
B6 B11 B7 108.80(14) . . ? 
B10 B11 B7 108.29(15) . . ? 
B11 B12 B8 108.32(15) . . ? 
B11 B12 B7 60.38(12) . . ? 
B8 B12 B7 60.13(13) . . ? 
B11 B12 B9 107.78(16) . . ? 
B8 B12 B9 59.87(13) . . ? 
B7 B12 B9 107.96(16) . . ? 
B11 B12 B10 59.95(12) . . ? 
B8 B12 B10 108.07(16) . . ? 
B7 B12 B10 108.36(15) . . ? 
B9 B12 B10 59.88(13) . . ? 
 
_diffrn_measured_fraction_theta_max    0.998 
_diffrn_reflns_theta_full              27.96 
_diffrn_measured_fraction_theta_full   0.998 
_refine_diff_density_max    0.195 
_refine_diff_density_min   -0.214 
_refine_diff_density_rms    0.036 
#===END


data_3p
 
_audit_creation_method            SHELXL-97 
_chemical_name_systematic 
; 
 ? 
; 
_chemical_name_common             ? 
_chemical_melting_point           ? 
_chemical_formula_moiety          ? 
_chemical_formula_sum 
 'C17 H38 B10 Si' 
_chemical_formula_weight          378.66 
 
loop_ 
 _atom_type_symbol 
 _atom_type_description 
 _atom_type_scat_dispersion_real 
 _atom_type_scat_dispersion_imag 
 _atom_type_scat_source 
 'C'  'C'   0.0033   0.0016 
 'International Tables Vol C Tables 4.2.6.8 and 6.1.1.4' 
 'H'  'H'   0.0000   0.0000 
 'International Tables Vol C Tables 4.2.6.8 and 6.1.1.4' 
 'B'  'B'   0.0013   0.0007 
 'International Tables Vol C Tables 4.2.6.8 and 6.1.1.4' 
 'Si'  'Si'   0.0817   0.0704 
 'International Tables Vol C Tables 4.2.6.8 and 6.1.1.4' 
 
_symmetry_cell_setting            Hexagonal 
_symmetry_space_group_name_H-M    P6(5) 
 
loop_ 
 _symmetry_equiv_pos_as_xyz 
 'x, y, z' 
 '-y, x-y, z+2/3' 
 '-x+y, -x, z+1/3' 
 '-x, -y, z+1/2' 
 'y, -x+y, z+1/6' 
 'x-y, x, z+5/6' 
 
_cell_length_a                    10.693(3) 
_cell_length_b                    10.693(3) 
_cell_length_c                    37.114(11) 
_cell_angle_alpha                 90.00 
_cell_angle_beta                  90.00 
_cell_angle_gamma                 120.00 
_cell_volume                      3675.1(18) 
_cell_formula_units_Z             6 
_cell_measurement_temperature     293(2) 
_cell_measurement_reflns_used     ? 
_cell_measurement_theta_min       ? 
_cell_measurement_theta_max       ? 
 
_exptl_crystal_description        block 
_exptl_crystal_colour             colourless 
_exptl_crystal_size_max           0.50 
_exptl_crystal_size_mid           0.40 
_exptl_crystal_size_min           0.30 
_exptl_crystal_density_meas       ? 
_exptl_crystal_density_diffrn     1.027 
_exptl_crystal_density_method     'not measured' 
_exptl_crystal_F_000              1224 
_exptl_absorpt_coefficient_mu     0.097 
_exptl_absorpt_correction_type    multi-scan 
_exptl_absorpt_correction_T_min   0.4858  
_exptl_absorpt_correction_T_max   0.7456 
_exptl_absorpt_process_details    ? 
 
_exptl_special_details 
; 
 ? 
; 
 
_diffrn_ambient_temperature       293(2) 
_diffrn_radiation_wavelength      0.71073 
_diffrn_radiation_type            MoK\a 
_diffrn_radiation_source          'fine-focus sealed tube' 
_diffrn_radiation_monochromator   graphite 
_diffrn_measurement_device_type   'BRUKER SMART CCD DIFFRACTOMETER' 
_diffrn_measurement_method        'OMEGA SCAN' 
_diffrn_detector_area_resol_mean  ? 
_diffrn_reflns_number             20088 
_diffrn_reflns_av_R_equivalents   0.0772 
_diffrn_reflns_av_sigmaI/netI     0.0629 
_diffrn_reflns_limit_h_min        -12 
_diffrn_reflns_limit_h_max        8 
_diffrn_reflns_limit_k_min        -12 
_diffrn_reflns_limit_k_max        12 
_diffrn_reflns_limit_l_min        -43 
_diffrn_reflns_limit_l_max        43 
_diffrn_reflns_theta_min          2.20 
_diffrn_reflns_theta_max          25.00 
_reflns_number_total              4322 
_reflns_number_gt                 3143 
_reflns_threshold_expression      >2sigma(I) 
 
_computing_data_collection        'BRUKER SMART CCD DIFFRACTOMETER'  
_computing_cell_refinement        'BRUKER SMART CCD DIFFRACTOMETER'  
_computing_data_reduction         'BRUKER SMART CCD DIFFRACTOMETER'  
_computing_structure_solution     'SHELXS-97 (Sheldrick, 2008)' 
_computing_structure_refinement   'SHELXL-97 (Sheldrick, 2008)' 
_computing_molecular_graphics     'SIEMENS SHELXTL' 
_computing_publication_material   'SIEMENS SHELXTL' 
 
_refine_special_details 
; 
 Refinement of F^2^ against ALL reflections.  The weighted R-factor wR and 
 goodness of fit S are based on F^2^, conventional R-factors R are based 
 on F, with F set to zero for negative F^2^. The threshold expression of 
 F^2^ > 2sigma(F^2^) is used only for calculating R-factors(gt) etc. and is 
 not relevant to the choice of reflections for refinement.  R-factors based 
 on F^2^ are statistically about twice as large as those based on F, and R- 
 factors based on ALL data will be even larger. 
; 
 
_refine_ls_structure_factor_coef  Fsqd  
_refine_ls_matrix_type            full 
_refine_ls_weighting_scheme       calc  
_refine_ls_weighting_details 
 'calc w=1/[\s^2^(Fo^2^)+(0.0870P)^2^+0.2563P] where P=(Fo^2^+2Fc^2^)/3' 
_atom_sites_solution_primary      direct 
_atom_sites_solution_secondary    difmap 
_atom_sites_solution_hydrogens    geom 
_refine_ls_hydrogen_treatment     riding
_refine_ls_extinction_method      none 
_refine_ls_extinction_coef        ? 
_refine_ls_number_reflns          4322 
_refine_ls_number_parameters      254 
_refine_ls_number_restraints      1 
_refine_ls_R_factor_all           0.0867 
_refine_ls_R_factor_gt            0.0550 
_refine_ls_wR_factor_ref          0.1580 
_refine_ls_wR_factor_gt           0.1356 
_refine_ls_goodness_of_fit_ref    1.066 
_refine_ls_restrained_S_all       1.066 
_refine_ls_shift/su_max           0.013 
_refine_ls_shift/su_mean          0.003 
 
loop_ 
 _atom_site_label 
 _atom_site_type_symbol 
 _atom_site_fract_x 
 _atom_site_fract_y 
 _atom_site_fract_z 
 _atom_site_U_iso_or_equiv 
 _atom_site_adp_type 
 _atom_site_occupancy 
 _atom_site_symmetry_multiplicity 
 _atom_site_calc_flag 
 _atom_site_refinement_flags 
 _atom_site_disorder_assembly 
 _atom_site_disorder_group 
Si1 Si 0.99193(10) 0.36679(10) 0.07278(4) 0.0584(3) Uani 1 1 d . . . 
C1 C 0.5181(3) 0.2232(3) 0.07610(9) 0.0361(7) Uani 1 1 d . . . 
C2 C 0.6960(3) 0.3292(3) 0.07402(10) 0.0408(7) Uani 1 1 d . . . 
C11 C 0.4638(3) 0.0668(3) 0.07821(8) 0.0348(7) Uani 1 1 d . . . 
C12 C 0.3010(3) -0.0303(3) 0.07928(10) 0.0471(8) Uani 1 1 d . . . 
H12A H 0.2560 0.0224 0.0700 0.057 Uiso 1 1 calc R . . 
H12B H 0.2739 -0.1127 0.0637 0.057 Uiso 1 1 calc R . . 
C13 C 0.2440(4) -0.0839(5) 0.11695(12) 0.0672(11) Uani 1 1 d . . . 
H13A H 0.1410 -0.1451 0.1161 0.101 Uiso 1 1 calc R . . 
H13B H 0.2680 -0.0029 0.1324 0.101 Uiso 1 1 calc R . . 
H13C H 0.2870 -0.1375 0.1262 0.101 Uiso 1 1 calc R . . 
C14 C 0.5564(3) 0.0165(3) 0.07866(8) 0.0363(7) Uani 1 1 d . . . 
C15 C 0.4971(3) -0.1456(3) 0.07458(10) 0.0473(8) Uani 1 1 d . . . 
H15A H 0.5570 -0.1738 0.0880 0.057 Uiso 1 1 calc R . . 
H15B H 0.3999 -0.1982 0.0843 0.057 Uiso 1 1 calc R . . 
C16 C 0.4954(5) -0.1828(4) 0.03505(11) 0.0678(11) Uani 1 1 d . . . 
H16A H 0.4580 -0.2848 0.0326 0.102 Uiso 1 1 calc R . . 
H16B H 0.5918 -0.1314 0.0256 0.102 Uiso 1 1 calc R . . 
H16C H 0.4352 -0.1557 0.0219 0.102 Uiso 1 1 calc R . . 
C18 C 0.7154(3) 0.1110(3) 0.08003(9) 0.0388(7) Uani 1 1 d . . . 
C19 C 0.8011(3) 0.0366(3) 0.08791(9) 0.0442(8) Uani 1 1 d . . . 
H19A H 0.9012 0.1012 0.0814 0.053 Uiso 1 1 calc R . . 
H19B H 0.7652 -0.0484 0.0728 0.053 Uiso 1 1 calc R . . 
C20 C 0.7950(4) -0.0088(4) 0.12695(10) 0.0515(9) Uani 1 1 d . . . 
H20A H 0.8223 0.0740 0.1424 0.062 Uiso 1 1 calc R . . 
H20B H 0.6966 -0.0814 0.1329 0.062 Uiso 1 1 calc R . . 
C21 C 0.8943(4) -0.0694(5) 0.13427(12) 0.0693(11) Uani 1 1 d . . . 
H21A H 0.8679 -0.1507 0.1183 0.083 Uiso 1 1 calc R . . 
H21B H 0.9926 0.0040 0.1285 0.083 Uiso 1 1 calc R . . 
C22 C 0.8904(5) -0.1183(7) 0.17245(15) 0.1011(18) Uani 1 1 d . . . 
H22A H 0.9552 -0.1554 0.1749 0.152 Uiso 1 1 calc R . . 
H22B H 0.7940 -0.1927 0.1783 0.152 Uiso 1 1 calc R . . 
H22C H 0.9193 -0.0380 0.1885 0.152 Uiso 1 1 calc R . . 
C23 C 0.7840(3) 0.2571(3) 0.07677(10) 0.0435(8) Uani 1 1 d . . . 
C24 C 1.0468(5) 0.2978(5) 0.03376(13) 0.0843(14) Uani 1 1 d . . . 
H24A H 1.1500 0.3511 0.0314 0.126 Uiso 1 1 calc R . . 
H24B H 1.0035 0.3090 0.0122 0.126 Uiso 1 1 calc R . . 
H24C H 1.0153 0.1974 0.0374 0.126 Uiso 1 1 calc R . . 
C25 C 1.0759(4) 0.3538(6) 0.11595(14) 0.0833(14) Uani 1 1 d . . . 
H25A H 1.1791 0.4083 0.1138 0.125 Uiso 1 1 calc R . . 
H25B H 1.0458 0.2545 0.1208 0.125 Uiso 1 1 calc R . . 
H25C H 1.0456 0.3920 0.1353 0.125 Uiso 1 1 calc R . . 
C26 C 1.0781(5) 0.5634(5) 0.0628(2) 0.125(3) Uani 1 1 d . . . 
H26A H 1.1809 0.6045 0.0616 0.187 Uiso 1 1 calc R . . 
H26B H 1.0547 0.6101 0.0816 0.187 Uiso 1 1 calc R . . 
H26C H 1.0430 0.5769 0.0402 0.187 Uiso 1 1 calc R . . 
B3 B 0.5951(4) 0.3031(4) 0.03510(11) 0.0452(9) Uani 1 1 d . . . 
H3 H 0.5990 0.2437 0.0113 0.054 Uiso 1 1 calc R . . 
B4 B 0.4328(4) 0.2918(4) 0.04964(13) 0.0510(10) Uani 1 1 d . . . 
H4 H 0.3310 0.2247 0.0351 0.061 Uiso 1 1 calc R . . 
B5 B 0.4382(5) 0.3078(4) 0.09712(13) 0.0544(11) Uani 1 1 d . . . 
H5 H 0.3391 0.2517 0.1133 0.065 Uiso 1 1 calc R . . 
B6 B 0.6032(4) 0.3276(4) 0.11294(12) 0.0504(10) Uani 1 1 d . . . 
H6 H 0.6123 0.2850 0.1392 0.061 Uiso 1 1 calc R . . 
B7 B 0.7388(5) 0.4760(4) 0.04648(13) 0.0526(11) Uani 1 1 d . . . 
H7 H 0.8369 0.5302 0.0298 0.063 Uiso 1 1 calc R . . 
B8 B 0.5728(5) 0.4564(4) 0.03203(13) 0.0577(11) Uani 1 1 d . . . 
H8 H 0.5626 0.4993 0.0059 0.069 Uiso 1 1 calc R . . 
B9 B 0.4748(5) 0.4575(5) 0.06975(15) 0.0646(12) Uani 1 1 d . . . 
H9 H 0.4004 0.5003 0.0683 0.077 Uiso 1 1 calc R . . 
B10 B 0.5816(5) 0.4798(5) 0.10859(15) 0.0641(12) Uani 1 1 d . . . 
H10 H 0.5774 0.5383 0.1325 0.077 Uiso 1 1 calc R . . 
B11 B 0.7442(5) 0.4900(4) 0.09418(13) 0.0550(11) Uani 1 1 d . . . 
H11 H 0.8470 0.5538 0.1086 0.066 Uiso 1 1 calc R . . 
B12 B 0.6656(5) 0.5717(4) 0.06827(14) 0.0627(12) Uani 1 1 d . . . 
H12 H 0.7164 0.6898 0.0660 0.075 Uiso 1 1 calc R . . 
 
loop_ 
 _atom_site_aniso_label 
 _atom_site_aniso_U_11 
 _atom_site_aniso_U_22 
 _atom_site_aniso_U_33 
 _atom_site_aniso_U_23 
 _atom_site_aniso_U_13 
 _atom_site_aniso_U_12 
Si1 0.0291(4) 0.0436(6) 0.0924(8) -0.0036(5) -0.0018(5) 0.0107(4) 
C1 0.0306(15) 0.0358(16) 0.0409(17) -0.0006(14) -0.0044(14) 0.0159(13) 
C2 0.0326(15) 0.0284(14) 0.0558(19) -0.0059(13) -0.0071(16) 0.0110(12) 
C11 0.0285(14) 0.0344(14) 0.0360(17) 0.0035(13) -0.0033(13) 0.0116(13) 
C12 0.0337(16) 0.0385(16) 0.063(2) 0.0087(16) -0.0048(16) 0.0132(14) 
C13 0.047(2) 0.070(3) 0.081(3) 0.020(2) 0.017(2) 0.026(2) 
C14 0.0324(15) 0.0287(14) 0.0427(17) -0.0004(13) -0.0019(13) 0.0115(12) 
C15 0.0405(16) 0.0335(16) 0.060(2) 0.0014(16) -0.0088(17) 0.0129(14) 
C16 0.084(3) 0.042(2) 0.070(3) -0.0127(18) -0.009(2) 0.026(2) 
C18 0.0298(15) 0.0369(17) 0.048(2) -0.0067(14) -0.0041(13) 0.0152(13) 
C19 0.0327(16) 0.0336(16) 0.065(2) -0.0011(15) -0.0004(15) 0.0155(13) 
C20 0.0406(18) 0.055(2) 0.063(2) 0.0031(17) 0.0013(16) 0.0269(17) 
C21 0.060(2) 0.081(3) 0.081(3) 0.008(2) -0.010(2) 0.046(2) 
C22 0.077(3) 0.138(5) 0.101(4) 0.043(3) -0.001(3) 0.063(3) 
C23 0.0321(15) 0.0305(16) 0.068(2) -0.0069(15) -0.0083(16) 0.0156(13) 
C24 0.059(3) 0.090(3) 0.075(3) 0.012(3) 0.017(2) 0.016(2) 
C25 0.043(2) 0.102(4) 0.082(3) -0.017(3) -0.009(2) 0.019(2) 
C26 0.038(2) 0.050(3) 0.261(8) 0.012(4) 0.009(3) 0.004(2) 
B3 0.043(2) 0.0375(19) 0.048(2) 0.0044(17) 0.0006(17) 0.0153(17) 
B4 0.043(2) 0.049(2) 0.066(3) 0.0099(19) -0.0068(19) 0.0269(19) 
B5 0.053(2) 0.052(2) 0.069(3) -0.001(2) 0.010(2) 0.034(2) 
B6 0.055(2) 0.047(2) 0.049(2) -0.0081(18) -0.0070(19) 0.0252(19) 
B7 0.047(2) 0.033(2) 0.075(3) 0.0021(19) 0.003(2) 0.0180(18) 
B8 0.061(3) 0.041(2) 0.069(3) 0.010(2) -0.003(2) 0.024(2) 
B9 0.060(3) 0.051(2) 0.096(4) 0.009(2) 0.007(3) 0.037(2) 
B10 0.068(3) 0.048(2) 0.082(3) -0.013(2) -0.001(2) 0.033(2) 
B11 0.049(2) 0.035(2) 0.078(3) -0.015(2) -0.011(2) 0.0189(18) 
B12 0.058(3) 0.036(2) 0.093(4) -0.002(2) 0.000(2) 0.023(2) 
 
_geom_special_details 
; 
 All esds (except the esd in the dihedral angle between two l.s. planes) 
 are estimated using the full covariance matrix.  The cell esds are taken 
 into account individually in the estimation of esds in distances, angles 
 and torsion angles; correlations between esds in cell parameters are only 
 used when they are defined by crystal symmetry.  An approximate (isotropic) 
 treatment of cell esds is used for estimating esds involving l.s. planes. 
; 
 
loop_ 
 _geom_bond_atom_site_label_1 
 _geom_bond_atom_site_label_2 
 _geom_bond_distance 
 _geom_bond_site_symmetry_2 
 _geom_bond_publ_flag 
Si1 C24 1.849(5) . ? 
Si1 C26 1.862(5) . ? 
Si1 C25 1.875(5) . ? 
Si1 C23 1.932(3) . ? 
C1 C11 1.473(4) . ? 
C1 C2 1.659(4) . ? 
C1 B5 1.711(5) . ? 
C1 B6 1.711(5) . ? 
C1 B4 1.733(5) . ? 
C1 B3 1.737(5) . ? 
C2 C23 1.490(4) . ? 
C2 B11 1.701(5) . ? 
C2 B7 1.732(5) . ? 
C2 B3 1.740(5) . ? 
C2 B6 1.747(6) . ? 
C11 C14 1.343(4) . ? 
C11 C12 1.517(4) . ? 
C12 C13 1.518(6) . ? 
C14 C18 1.482(4) . ? 
C14 C15 1.527(4) . ? 
C15 C16 1.518(6) . ? 
C18 C23 1.358(4) . ? 
C18 C19 1.513(4) . ? 
C19 C20 1.519(5) . ? 
C20 C21 1.520(5) . ? 
C21 C22 1.504(6) . ? 
B3 B4 1.763(6) . ? 
B3 B7 1.766(5) . ? 
B3 B8 1.774(6) . ? 
B4 B9 1.761(7) . ? 
B4 B5 1.768(6) . ? 
B4 B8 1.770(6) . ? 
B5 B10 1.759(6) . ? 
B5 B9 1.767(6) . ? 
B5 B6 1.769(6) . ? 
B6 B10 1.761(6) . ? 
B6 B11 1.777(6) . ? 
B7 B8 1.763(6) . ? 
B7 B12 1.765(6) . ? 
B7 B11 1.775(7) . ? 
B8 B9 1.753(7) . ? 
B8 B12 1.758(7) . ? 
B9 B12 1.779(6) . ? 
B9 B10 1.780(8) . ? 
B10 B12 1.769(7) . ? 
B10 B11 1.769(7) . ? 
B11 B12 1.769(6) . ? 
 
loop_ 
 _geom_angle_atom_site_label_1 
 _geom_angle_atom_site_label_2 
 _geom_angle_atom_site_label_3 
 _geom_angle 
 _geom_angle_site_symmetry_1 
 _geom_angle_site_symmetry_3 
 _geom_angle_publ_flag 
C24 Si1 C26 102.6(3) . . ? 
C24 Si1 C25 112.4(2) . . ? 
C26 Si1 C25 105.5(3) . . ? 
C24 Si1 C23 108.42(18) . . ? 
C26 Si1 C23 118.06(19) . . ? 
C25 Si1 C23 109.73(19) . . ? 
C11 C1 C2 116.4(2) . . ? 
C11 C1 B5 123.9(3) . . ? 
C2 C1 B5 111.4(2) . . ? 
C11 C1 B6 118.5(3) . . ? 
C2 C1 B6 62.4(2) . . ? 
B5 C1 B6 62.2(2) . . ? 
C11 C1 B4 121.2(2) . . ? 
C2 C1 B4 110.5(2) . . ? 
B5 C1 B4 61.8(2) . . ? 
B6 C1 B4 113.4(3) . . ? 
C11 C1 B3 115.2(3) . . ? 
C2 C1 B3 61.6(2) . . ? 
B5 C1 B3 112.3(3) . . ? 
B6 C1 B3 114.4(2) . . ? 
B4 C1 B3 61.1(2) . . ? 
C23 C2 C1 116.6(2) . . ? 
C23 C2 B11 122.9(3) . . ? 
C1 C2 B11 109.6(3) . . ? 
C23 C2 B7 124.1(3) . . ? 
C1 C2 B7 109.9(2) . . ? 
B11 C2 B7 62.3(3) . . ? 
C23 C2 B3 118.4(3) . . ? 
C1 C2 B3 61.44(19) . . ? 
B11 C2 B3 112.2(3) . . ? 
B7 C2 B3 61.1(2) . . ? 
C23 C2 B6 116.2(3) . . ? 
C1 C2 B6 60.2(2) . . ? 
B11 C2 B6 62.0(2) . . ? 
B7 C2 B6 112.9(3) . . ? 
B3 C2 B6 112.4(2) . . ? 
C14 C11 C1 120.3(2) . . ? 
C14 C11 C12 123.3(3) . . ? 
C1 C11 C12 116.4(2) . . ? 
C13 C12 C11 112.9(3) . . ? 
C11 C14 C18 123.5(3) . . ? 
C11 C14 C15 118.9(3) . . ? 
C18 C14 C15 117.5(3) . . ? 
C16 C15 C14 109.7(3) . . ? 
C23 C18 C14 123.8(3) . . ? 
C23 C18 C19 120.1(3) . . ? 
C14 C18 C19 116.0(2) . . ? 
C18 C19 C20 114.3(3) . . ? 
C21 C20 C19 112.3(3) . . ? 
C22 C21 C20 114.3(4) . . ? 
C18 C23 C2 118.9(3) . . ? 
C18 C23 Si1 120.1(2) . . ? 
C2 C23 Si1 120.9(2) . . ? 
C1 B3 C2 56.99(19) . . ? 
C1 B3 B4 59.3(2) . . ? 
C2 B3 B4 105.5(3) . . ? 
C1 B3 B7 104.8(3) . . ? 
C2 B3 B7 59.2(2) . . ? 
B4 B3 B7 108.0(3) . . ? 
C1 B3 B8 105.1(3) . . ? 
C2 B3 B8 105.3(3) . . ? 
B4 B3 B8 60.0(2) . . ? 
B7 B3 B8 59.7(2) . . ? 
C1 B4 B9 105.2(3) . . ? 
C1 B4 B3 59.6(2) . . ? 
B9 B4 B3 108.3(3) . . ? 
C1 B4 B5 58.5(2) . . ? 
B9 B4 B5 60.1(3) . . ? 
B3 B4 B5 108.3(3) . . ? 
C1 B4 B8 105.5(3) . . ? 
B9 B4 B8 59.5(3) . . ? 
B3 B4 B8 60.3(2) . . ? 
B5 B4 B8 107.5(3) . . ? 
C1 B5 B10 104.9(3) . . ? 
C1 B5 B9 105.9(3) . . ? 
B10 B5 B9 60.6(3) . . ? 
C1 B5 B4 59.7(2) . . ? 
B10 B5 B4 108.1(3) . . ? 
B9 B5 B4 59.8(3) . . ? 
C1 B5 B6 58.9(2) . . ? 
B10 B5 B6 59.9(2) . . ? 
B9 B5 B6 109.1(3) . . ? 
B4 B5 B6 109.0(3) . . ? 
C1 B6 C2 57.32(19) . . ? 
C1 B6 B10 104.9(3) . . ? 
C2 B6 B10 104.5(3) . . ? 
C1 B6 B5 58.9(2) . . ? 
C2 B6 B5 104.7(3) . . ? 
B10 B6 B5 59.8(2) . . ? 
C1 B6 B11 103.8(3) . . ? 
C2 B6 B11 57.7(2) . . ? 
B10 B6 B11 60.0(2) . . ? 
B5 B6 B11 107.2(3) . . ? 
C2 B7 B8 106.1(3) . . ? 
C2 B7 B12 105.2(3) . . ? 
B8 B7 B12 59.8(3) . . ? 
C2 B7 B3 59.6(2) . . ? 
B8 B7 B3 60.4(2) . . ? 
B12 B7 B3 108.1(3) . . ? 
C2 B7 B11 58.0(2) . . ? 
B8 B7 B11 107.6(3) . . ? 
B12 B7 B11 60.0(3) . . ? 
B3 B7 B11 107.5(3) . . ? 
B9 B8 B12 60.9(3) . . ? 
B9 B8 B7 109.0(3) . . ? 
B12 B8 B7 60.2(2) . . ? 
B9 B8 B4 60.0(3) . . ? 
B12 B8 B4 108.4(3) . . ? 
B7 B8 B4 107.9(3) . . ? 
B9 B8 B3 108.2(3) . . ? 
B12 B8 B3 108.0(3) . . ? 
B7 B8 B3 59.9(2) . . ? 
B4 B8 B3 59.7(2) . . ? 
B8 B9 B4 60.5(3) . . ? 
B8 B9 B5 108.4(3) . . ? 
B4 B9 B5 60.2(2) . . ? 
B8 B9 B12 59.7(3) . . ? 
B4 B9 B12 107.8(3) . . ? 
B5 B9 B12 107.3(3) . . ? 
B8 B9 B10 107.6(3) . . ? 
B4 B9 B10 107.6(3) . . ? 
B5 B9 B10 59.5(3) . . ? 
B12 B9 B10 59.6(3) . . ? 
B5 B10 B6 60.3(2) . . ? 
B5 B10 B12 108.1(3) . . ? 
B6 B10 B12 109.0(3) . . ? 
B5 B10 B11 107.9(3) . . ? 
B6 B10 B11 60.4(2) . . ? 
B12 B10 B11 60.0(3) . . ? 
B5 B10 B9 59.9(3) . . ? 
B6 B10 B9 108.8(3) . . ? 
B12 B10 B9 60.2(3) . . ? 
B11 B10 B9 108.0(4) . . ? 
C2 B11 B12 106.3(3) . . ? 
C2 B11 B10 106.1(3) . . ? 
B12 B11 B10 60.0(3) . . ? 
C2 B11 B6 60.3(2) . . ? 
B12 B11 B6 108.3(3) . . ? 
B10 B11 B6 59.6(2) . . ? 
C2 B11 B7 59.7(2) . . ? 
B12 B11 B7 59.7(3) . . ? 
B10 B11 B7 107.8(3) . . ? 
B6 B11 B7 109.4(3) . . ? 
B8 B12 B7 60.1(3) . . ? 
B8 B12 B10 107.8(3) . . ? 
B7 B12 B10 108.3(3) . . ? 
B8 B12 B11 108.1(3) . . ? 
B7 B12 B11 60.3(3) . . ? 
B10 B12 B11 60.0(3) . . ? 
B8 B12 B9 59.4(3) . . ? 
B7 B12 B9 107.8(3) . . ? 
B10 B12 B9 60.2(3) . . ? 
B11 B12 B9 108.0(3) . . ? 
 
_diffrn_measured_fraction_theta_max    1.000 
_diffrn_reflns_theta_full              25.00 
_diffrn_measured_fraction_theta_full   1.000 
_refine_diff_density_max    0.218 
_refine_diff_density_min   -0.189 
_refine_diff_density_rms    0.040 
#===END


data_3q 
 
_audit_creation_method            SHELXL-97 
_chemical_name_systematic 
; 
 ? 
; 
_chemical_name_common             ? 
_chemical_melting_point           ? 
_chemical_formula_moiety          ? 
_chemical_formula_sum 
 'C19 H34 B10 Si' 
_chemical_formula_weight          398.65 
 
loop_ 
 _atom_type_symbol 
 _atom_type_description 
 _atom_type_scat_dispersion_real 
 _atom_type_scat_dispersion_imag 
 _atom_type_scat_source 
 'C'  'C'   0.0033   0.0016 
 'International Tables Vol C Tables 4.2.6.8 and 6.1.1.4' 
 'H'  'H'   0.0000   0.0000 
 'International Tables Vol C Tables 4.2.6.8 and 6.1.1.4' 
 'B'  'B'   0.0013   0.0007 
 'International Tables Vol C Tables 4.2.6.8 and 6.1.1.4' 
 'Si'  'Si'   0.0817   0.0704 
 'International Tables Vol C Tables 4.2.6.8 and 6.1.1.4' 
 
_symmetry_cell_setting            Monoclinic 
_symmetry_space_group_name_H-M    P2(1)/c 
 
loop_ 
 _symmetry_equiv_pos_as_xyz 
 'x, y, z' 
 '-x, y+1/2, -z+1/2' 
 '-x, -y, -z' 
 'x, -y-1/2, z-1/2' 
 
_cell_length_a                    13.579(2) 
_cell_length_b                    13.033(2) 
_cell_length_c                    14.930(2) 
_cell_angle_alpha                 90.00 
_cell_angle_beta                  113.184(3) 
_cell_angle_gamma                 90.00 
_cell_volume                      2428.8(7) 
_cell_formula_units_Z             4 
_cell_measurement_temperature     293(2) 
_cell_measurement_reflns_used     ? 
_cell_measurement_theta_min       ? 
_cell_measurement_theta_max       ? 
 
_exptl_crystal_description        Block 
_exptl_crystal_colour             colourless 
_exptl_crystal_size_max           0.50 
_exptl_crystal_size_mid           0.40 
_exptl_crystal_size_min           0.30 
_exptl_crystal_density_meas       ? 
_exptl_crystal_density_diffrn     1.090 
_exptl_crystal_density_method     'not measured' 
_exptl_crystal_F_000              848 
_exptl_absorpt_coefficient_mu     0.101 
_exptl_absorpt_correction_type    multi-scan 
_exptl_absorpt_correction_T_min   0.5922 
_exptl_absorpt_correction_T_max   0.7456 
_exptl_absorpt_process_details    ? 
 
_exptl_special_details 
; 
 ? 
; 
 
_diffrn_ambient_temperature       293(2) 
_diffrn_radiation_wavelength      0.71073 
_diffrn_radiation_type            MoK\a 
_diffrn_radiation_source          'fine-focus sealed tube' 
_diffrn_radiation_monochromator   graphite 
_diffrn_measurement_device_type   'BRUKER SMART CCD DIFFRACTOMETER' 
_diffrn_measurement_method        'OMEGA SCAN' 
_diffrn_detector_area_resol_mean  ? 
_diffrn_reflns_number             12905 
_diffrn_reflns_av_R_equivalents   0.0496 
_diffrn_reflns_av_sigmaI/netI     0.0560 
_diffrn_reflns_limit_h_min        -16 
_diffrn_reflns_limit_h_max        9 
_diffrn_reflns_limit_k_min        -15 
_diffrn_reflns_limit_k_max        15 
_diffrn_reflns_limit_l_min        -17 
_diffrn_reflns_limit_l_max        17 
_diffrn_reflns_theta_min          1.63 
_diffrn_reflns_theta_max          25.00 
_reflns_number_total              4285 
_reflns_number_gt                 2666 
_reflns_threshold_expression      >2sigma(I) 
 
_computing_data_collection        'BRUKER SMART CCD DIFFRACTOMETER'  
_computing_cell_refinement        'BRUKER SMART CCD DIFFRACTOMETER'  
_computing_data_reduction         'BRUKER SMART CCD DIFFRACTOMETER'  
_computing_structure_solution     'SHELXS-97 (Sheldrick, 2008)' 
_computing_structure_refinement   'SHELXL-97 (Sheldrick, 2008)' 
_computing_molecular_graphics     'SIEMENS SHELXTL' 
_computing_publication_material   'SIEMENS SHELXTL'  
 
_refine_special_details 
; 
 Refinement of F^2^ against ALL reflections.  The weighted R-factor wR and 
 goodness of fit S are based on F^2^, conventional R-factors R are based 
 on F, with F set to zero for negative F^2^. The threshold expression of 
 F^2^ > 2sigma(F^2^) is used only for calculating R-factors(gt) etc. and is 
 not relevant to the choice of reflections for refinement.  R-factors based 
 on F^2^ are statistically about twice as large as those based on F, and R- 
 factors based on ALL data will be even larger. 
; 
 
_refine_ls_structure_factor_coef  Fsqd  
_refine_ls_matrix_type            full 
_refine_ls_weighting_scheme       calc  
_refine_ls_weighting_details 
 'calc w=1/[\s^2^(Fo^2^)+(0.0920P)^2^+0.1503P] where P=(Fo^2^+2Fc^2^)/3' 
_atom_sites_solution_primary      direct 
_atom_sites_solution_secondary    difmap 
_atom_sites_solution_hydrogens    geom 
_refine_ls_hydrogen_treatment     riding 
_refine_ls_extinction_method      none 
_refine_ls_extinction_coef        ? 
_refine_ls_number_reflns          4285 
_refine_ls_number_parameters      271 
_refine_ls_number_restraints      0 
_refine_ls_R_factor_all           0.0985 
_refine_ls_R_factor_gt            0.0544 
_refine_ls_wR_factor_ref          0.1745 
_refine_ls_wR_factor_gt           0.1403 
_refine_ls_goodness_of_fit_ref    1.062 
_refine_ls_restrained_S_all       1.062 
_refine_ls_shift/su_max           0.000 
_refine_ls_shift/su_mean          0.000 
 
loop_ 
 _atom_site_label 
 _atom_site_type_symbol 
 _atom_site_fract_x 
 _atom_site_fract_y 
 _atom_site_fract_z 
 _atom_site_U_iso_or_equiv 
 _atom_site_adp_type 
 _atom_site_occupancy 
 _atom_site_symmetry_multiplicity 
 _atom_site_calc_flag 
 _atom_site_refinement_flags 
 _atom_site_disorder_assembly 
 _atom_site_disorder_group 
Si1 Si 0.38746(6) 0.02937(6) 0.18170(5) 0.0552(3) Uani 1 1 d . . . 
C1 C 0.14529(18) -0.14889(17) -0.06593(16) 0.0383(6) Uani 1 1 d . . . 
C2 C 0.23511(17) -0.11843(18) 0.04480(16) 0.0403(6) Uani 1 1 d . . . 
C11 C 0.10752(18) -0.06446(17) -0.13703(15) 0.0374(6) Uani 1 1 d . . . 
C12 C 0.0172(2) -0.0901(2) -0.23359(17) 0.0544(7) Uani 1 1 d . . . 
H12A H 0.0173 -0.1634 -0.2449 0.065 Uiso 1 1 calc R . . 
H12B H 0.0299 -0.0555 -0.2855 0.065 Uiso 1 1 calc R . . 
C13 C -0.0926(2) -0.0588(3) -0.2374(2) 0.0740(9) Uani 1 1 d . . . 
H13A H -0.1466 -0.0769 -0.2997 0.111 Uiso 1 1 calc R . . 
H13B H -0.0939 0.0139 -0.2280 0.111 Uiso 1 1 calc R . . 
H13C H -0.1063 -0.0938 -0.1870 0.111 Uiso 1 1 calc R . . 
C14 C 0.15067(17) 0.02953(17) -0.11438(15) 0.0363(5) Uani 1 1 d . . . 
C15 C 0.1198(2) 0.11066(19) -0.19328(17) 0.0479(6) Uani 1 1 d . . . 
H15A H 0.1251 0.1779 -0.1640 0.058 Uiso 1 1 calc R . . 
H15B H 0.0460 0.1003 -0.2379 0.058 Uiso 1 1 calc R . . 
C16 C 0.1925(2) 0.1065(2) -0.2498(2) 0.0725(9) Uani 1 1 d . . . 
H16A H 0.1709 0.1583 -0.2995 0.109 Uiso 1 1 calc R . . 
H16B H 0.1869 0.0401 -0.2793 0.109 Uiso 1 1 calc R . . 
H16C H 0.2654 0.1184 -0.2059 0.109 Uiso 1 1 calc R . . 
C17 C 0.23224(17) 0.05572(17) -0.01626(16) 0.0355(5) Uani 1 1 d . . . 
C18 C 0.27009(19) 0.16507(17) -0.00590(16) 0.0412(6) Uani 1 1 d . . . 
C19 C 0.2094(2) 0.24249(19) 0.01068(18) 0.0541(7) Uani 1 1 d . . . 
H19A H 0.1462 0.2260 0.0176 0.065 Uiso 1 1 calc R . . 
C20 C 0.2410(3) 0.3427(2) 0.0170(2) 0.0750(9) Uani 1 1 d . . . 
H20A H 0.1991 0.3937 0.0278 0.090 Uiso 1 1 calc R . . 
C21 C 0.3339(4) 0.3681(3) 0.0075(2) 0.0886(11) Uani 1 1 d . . . 
H21A H 0.3550 0.4365 0.0118 0.106 Uiso 1 1 calc R . . 
C22 C 0.3963(3) 0.2932(3) -0.0085(2) 0.0800(10) Uani 1 1 d . . . 
H22A H 0.4600 0.3105 -0.0142 0.096 Uiso 1 1 calc R . . 
C23 C 0.3639(2) 0.1918(2) -0.0159(2) 0.0580(7) Uani 1 1 d . . . 
H23A H 0.4054 0.1411 -0.0278 0.070 Uiso 1 1 calc R . . 
C24 C 0.27190(17) -0.00947(18) 0.06068(16) 0.0379(6) Uani 1 1 d . . . 
C25 C 0.3782(2) 0.1630(2) 0.2205(2) 0.0748(9) Uani 1 1 d . . . 
H25A H 0.4379 0.1769 0.2806 0.112 Uiso 1 1 calc R . . 
H25B H 0.3126 0.1713 0.2299 0.112 Uiso 1 1 calc R . . 
H25C H 0.3792 0.2097 0.1713 0.112 Uiso 1 1 calc R . . 
C26 C 0.5144(2) 0.0100(3) 0.1639(3) 0.0909(11) Uani 1 1 d . . . 
H26A H 0.5741 0.0288 0.2224 0.136 Uiso 1 1 calc R . . 
H26B H 0.5139 0.0521 0.1109 0.136 Uiso 1 1 calc R . . 
H26C H 0.5207 -0.0608 0.1492 0.136 Uiso 1 1 calc R . . 
C27 C 0.3973(3) -0.0460(3) 0.2914(2) 0.0924(12) Uani 1 1 d . . . 
H27A H 0.4565 -0.0213 0.3475 0.139 Uiso 1 1 calc R . . 
H27B H 0.4082 -0.1172 0.2814 0.139 Uiso 1 1 calc R . . 
H27C H 0.3322 -0.0384 0.3017 0.139 Uiso 1 1 calc R . . 
B3 B 0.1039(2) -0.1480(2) 0.0296(2) 0.0434(7) Uani 1 1 d . . . 
H3 H 0.0475 -0.0920 0.0380 0.052 Uiso 1 1 calc R . . 
B4 B 0.0622(3) -0.2450(2) -0.0603(2) 0.0538(8) Uani 1 1 d . . . 
H4 H -0.0221 -0.2523 -0.1108 0.065 Uiso 1 1 calc R . . 
B5 B 0.1685(3) -0.2705(2) -0.0984(3) 0.0590(9) Uani 1 1 d . . . 
H5 H 0.1529 -0.2941 -0.1736 0.071 Uiso 1 1 calc R . . 
B6 B 0.2774(2) -0.1892(2) -0.0324(2) 0.0521(8) Uani 1 1 d . . . 
H6 H 0.3325 -0.1598 -0.0641 0.063 Uiso 1 1 calc R . . 
B7 B 0.2135(3) -0.1946(3) 0.1296(2) 0.0594(9) Uani 1 1 d . . . 
H7 H 0.2283 -0.1689 0.2040 0.071 Uiso 1 1 calc R . . 
B8 B 0.1070(3) -0.2766(3) 0.0643(3) 0.0643(9) Uani 1 1 d . . . 
H8 H 0.0518 -0.3059 0.0960 0.077 Uiso 1 1 calc R . . 
B9 B 0.1464(3) -0.3532(3) -0.0143(3) 0.0734(11) Uani 1 1 d . . . 
H9 H 0.1171 -0.4321 -0.0342 0.088 Uiso 1 1 calc R . . 
B10 B 0.2783(3) -0.3175(3) 0.0033(3) 0.0750(11) Uani 1 1 d . . . 
H10 H 0.3351 -0.3732 -0.0048 0.090 Uiso 1 1 calc R . . 
B11 B 0.3206(3) -0.2199(3) 0.0923(3) 0.0626(9) Uani 1 1 d . . . 
H11 H 0.4048 -0.2109 0.1424 0.075 Uiso 1 1 calc R . . 
B12 B 0.2397(3) -0.3214(3) 0.1034(3) 0.0796(12) Uani 1 1 d . . . 
H12 H 0.2714 -0.3798 0.1609 0.095 Uiso 1 1 calc R . . 
 
loop_ 
 _atom_site_aniso_label 
 _atom_site_aniso_U_11 
 _atom_site_aniso_U_22 
 _atom_site_aniso_U_33 
 _atom_site_aniso_U_23 
 _atom_site_aniso_U_13 
 _atom_site_aniso_U_12 
Si1 0.0402(5) 0.0675(6) 0.0456(5) -0.0060(4) 0.0036(3) 0.0049(4) 
C1 0.0406(14) 0.0347(13) 0.0423(13) -0.0039(10) 0.0192(11) 0.0010(10) 
C2 0.0366(14) 0.0398(14) 0.0414(13) 0.0044(10) 0.0122(11) 0.0065(10) 
C11 0.0400(14) 0.0402(14) 0.0336(12) -0.0023(10) 0.0161(11) 0.0020(11) 
C12 0.0672(19) 0.0540(17) 0.0379(14) -0.0098(12) 0.0162(14) -0.0098(14) 
C13 0.0516(19) 0.094(2) 0.0584(19) -0.0057(17) 0.0023(15) -0.0082(16) 
C14 0.0348(13) 0.0354(13) 0.0390(13) 0.0021(10) 0.0148(10) 0.0057(10) 
C15 0.0497(16) 0.0419(15) 0.0448(14) 0.0077(11) 0.0106(12) 0.0044(12) 
C16 0.075(2) 0.081(2) 0.067(2) 0.0315(17) 0.0331(17) 0.0086(16) 
C17 0.0297(12) 0.0358(13) 0.0415(13) -0.0034(10) 0.0146(10) 0.0028(10) 
C18 0.0438(15) 0.0367(14) 0.0423(14) -0.0025(11) 0.0162(11) -0.0014(11) 
C19 0.0634(18) 0.0408(16) 0.0606(17) -0.0011(13) 0.0272(14) 0.0080(13) 
C20 0.107(3) 0.0425(18) 0.068(2) -0.0060(15) 0.0264(19) 0.0096(18) 
C21 0.133(3) 0.046(2) 0.075(2) -0.0039(16) 0.029(2) -0.030(2) 
C22 0.084(2) 0.076(2) 0.081(2) -0.0110(18) 0.0342(19) -0.042(2) 
C23 0.0523(17) 0.0618(19) 0.0655(18) -0.0109(14) 0.0293(15) -0.0138(14) 
C24 0.0311(13) 0.0399(14) 0.0412(13) -0.0007(10) 0.0126(10) 0.0052(10) 
C25 0.078(2) 0.083(2) 0.0488(17) -0.0201(15) 0.0089(15) -0.0060(17) 
C26 0.0430(18) 0.117(3) 0.096(3) -0.021(2) 0.0095(17) 0.0069(18) 
C27 0.088(3) 0.111(3) 0.0474(18) 0.0079(18) -0.0057(17) 0.011(2) 
B3 0.0428(16) 0.0496(18) 0.0422(16) 0.0050(13) 0.0214(13) 0.0032(13) 
B4 0.057(2) 0.0416(18) 0.068(2) -0.0009(15) 0.0297(16) -0.0079(14) 
B5 0.068(2) 0.0359(17) 0.084(2) -0.0117(16) 0.0416(19) -0.0008(15) 
B6 0.0480(18) 0.0387(17) 0.079(2) -0.0013(15) 0.0346(17) 0.0100(14) 
B7 0.061(2) 0.062(2) 0.0526(19) 0.0251(16) 0.0193(16) 0.0114(16) 
B8 0.064(2) 0.061(2) 0.075(2) 0.0230(18) 0.0346(19) -0.0009(17) 
B9 0.084(3) 0.0339(18) 0.108(3) 0.0091(18) 0.044(2) -0.0023(17) 
B10 0.072(2) 0.0367(18) 0.123(3) 0.0098(19) 0.045(2) 0.0166(16) 
B11 0.056(2) 0.0452(19) 0.081(2) 0.0184(17) 0.0201(18) 0.0171(15) 
B12 0.077(3) 0.055(2) 0.102(3) 0.036(2) 0.030(2) 0.0142(19) 
 
_geom_special_details 
; 
 All esds (except the esd in the dihedral angle between two l.s. planes) 
 are estimated using the full covariance matrix.  The cell esds are taken 
 into account individually in the estimation of esds in distances, angles 
 and torsion angles; correlations between esds in cell parameters are only 
 used when they are defined by crystal symmetry.  An approximate (isotropic) 
 treatment of cell esds is used for estimating esds involving l.s. planes. 
; 
 
loop_ 
 _geom_bond_atom_site_label_1 
 _geom_bond_atom_site_label_2 
 _geom_bond_distance 
 _geom_bond_site_symmetry_2 
 _geom_bond_publ_flag 
Si1 C25 1.855(3) . ? 
Si1 C26 1.861(3) . ? 
Si1 C27 1.870(3) . ? 
Si1 C24 1.937(2) . ? 
C1 C11 1.474(3) . ? 
C1 C2 1.671(3) . ? 
C1 B4 1.709(4) . ? 
C1 B5 1.722(4) . ? 
C1 B3 1.727(3) . ? 
C1 B6 1.743(4) . ? 
C2 C24 1.493(3) . ? 
C2 B11 1.718(4) . ? 
C2 B7 1.723(4) . ? 
C2 B6 1.740(4) . ? 
C2 B3 1.748(4) . ? 
C11 C14 1.343(3) . ? 
C11 C12 1.517(3) . ? 
C12 C13 1.524(4) . ? 
C14 C17 1.487(3) . ? 
C14 C15 1.514(3) . ? 
C15 C16 1.531(3) . ? 
C17 C24 1.358(3) . ? 
C17 C18 1.502(3) . ? 
C18 C23 1.384(3) . ? 
C18 C19 1.385(3) . ? 
C19 C20 1.366(4) . ? 
C20 C21 1.364(5) . ? 
C21 C22 1.375(5) . ? 
C22 C23 1.383(4) . ? 
B3 B7 1.750(4) . ? 
B3 B8 1.750(4) . ? 
B3 B4 1.767(4) . ? 
B4 B8 1.764(5) . ? 
B4 B9 1.775(5) . ? 
B4 B5 1.779(4) . ? 
B5 B10 1.767(5) . ? 
B5 B9 1.768(5) . ? 
B5 B6 1.770(5) . ? 
B6 B10 1.753(4) . ? 
B6 B11 1.763(5) . ? 
B7 B8 1.753(5) . ? 
B7 B12 1.768(5) . ? 
B7 B11 1.782(5) . ? 
B8 B12 1.761(5) . ? 
B8 B9 1.777(5) . ? 
B9 B12 1.764(6) . ? 
B9 B10 1.767(5) . ? 
B10 B11 1.763(5) . ? 
B10 B12 1.768(6) . ? 
B11 B12 1.768(5) . ? 
 
loop_ 
 _geom_angle_atom_site_label_1 
 _geom_angle_atom_site_label_2 
 _geom_angle_atom_site_label_3 
 _geom_angle 
 _geom_angle_site_symmetry_1 
 _geom_angle_site_symmetry_3 
 _geom_angle_publ_flag 
C25 Si1 C26 110.64(16) . . ? 
C25 Si1 C27 102.09(15) . . ? 
C26 Si1 C27 107.66(16) . . ? 
C25 Si1 C24 114.02(12) . . ? 
C26 Si1 C24 106.69(12) . . ? 
C27 Si1 C24 115.60(13) . . ? 
C11 C1 C2 116.54(18) . . ? 
C11 C1 B4 122.2(2) . . ? 
C2 C1 B4 111.36(18) . . ? 
C11 C1 B5 122.3(2) . . ? 
C2 C1 B5 110.74(19) . . ? 
B4 C1 B5 62.45(16) . . ? 
C11 C1 B3 117.12(18) . . ? 
C2 C1 B3 61.90(14) . . ? 
B4 C1 B3 61.89(16) . . ? 
B5 C1 B3 113.2(2) . . ? 
C11 C1 B6 117.33(19) . . ? 
C2 C1 B6 61.26(15) . . ? 
B4 C1 B6 112.9(2) . . ? 
B5 C1 B6 61.43(16) . . ? 
B3 C1 B6 113.41(19) . . ? 
C24 C2 C1 116.84(18) . . ? 
C24 C2 B11 122.5(2) . . ? 
C1 C2 B11 109.7(2) . . ? 
C24 C2 B7 125.1(2) . . ? 
C1 C2 B7 108.73(19) . . ? 
B11 C2 B7 62.37(17) . . ? 
C24 C2 B6 115.61(19) . . ? 
C1 C2 B6 61.41(16) . . ? 
B11 C2 B6 61.29(17) . . ? 
B7 C2 B6 112.2(2) . . ? 
C24 C2 B3 119.36(18) . . ? 
C1 C2 B3 60.64(14) . . ? 
B11 C2 B3 111.9(2) . . ? 
B7 C2 B3 60.54(15) . . ? 
B6 C2 B3 112.49(19) . . ? 
C14 C11 C1 120.4(2) . . ? 
C14 C11 C12 123.3(2) . . ? 
C1 C11 C12 116.2(2) . . ? 
C11 C12 C13 112.9(2) . . ? 
C11 C14 C17 122.7(2) . . ? 
C11 C14 C15 118.8(2) . . ? 
C17 C14 C15 118.5(2) . . ? 
C14 C15 C16 111.3(2) . . ? 
C24 C17 C14 125.7(2) . . ? 
C24 C17 C18 120.1(2) . . ? 
C14 C17 C18 114.28(19) . . ? 
C23 C18 C19 118.2(2) . . ? 
C23 C18 C17 121.3(2) . . ? 
C19 C18 C17 120.4(2) . . ? 
C20 C19 C18 121.1(3) . . ? 
C21 C20 C19 120.2(3) . . ? 
C20 C21 C22 120.2(3) . . ? 
C21 C22 C23 119.6(3) . . ? 
C22 C23 C18 120.6(3) . . ? 
C17 C24 C2 117.7(2) . . ? 
C17 C24 Si1 122.10(18) . . ? 
C2 C24 Si1 119.62(16) . . ? 
C1 B3 C2 57.46(13) . . ? 
C1 B3 B7 105.0(2) . . ? 
C2 B3 B7 59.01(16) . . ? 
C1 B3 B8 105.1(2) . . ? 
C2 B3 B8 105.6(2) . . ? 
B7 B3 B8 60.12(19) . . ? 
C1 B3 B4 58.56(15) . . ? 
C2 B3 B4 105.15(19) . . ? 
B7 B3 B4 108.1(2) . . ? 
B8 B3 B4 60.19(18) . . ? 
C1 B4 B8 105.3(2) . . ? 
C1 B4 B3 59.55(15) . . ? 
B8 B4 B3 59.43(18) . . ? 
C1 B4 B9 105.3(2) . . ? 
B8 B4 B9 60.3(2) . . ? 
B3 B4 B9 108.1(2) . . ? 
C1 B4 B5 59.14(15) . . ? 
B8 B4 B5 107.9(2) . . ? 
B3 B4 B5 108.6(2) . . ? 
B9 B4 B5 59.66(19) . . ? 
C1 B5 B10 105.2(2) . . ? 
C1 B5 B9 105.1(2) . . ? 
B10 B5 B9 60.0(2) . . ? 
C1 B5 B6 59.85(16) . . ? 
B10 B5 B6 59.44(19) . . ? 
B9 B5 B6 107.9(3) . . ? 
C1 B5 B4 58.41(15) . . ? 
B10 B5 B4 107.8(2) . . ? 
B9 B5 B4 60.06(18) . . ? 
B6 B5 B4 108.3(2) . . ? 
C2 B6 C1 57.33(13) . . ? 
C2 B6 B10 105.6(2) . . ? 
C1 B6 B10 105.0(2) . . ? 
C2 B6 B11 58.74(17) . . ? 
C1 B6 B11 104.4(2) . . ? 
B10 B6 B11 60.2(2) . . ? 
C2 B6 B5 105.4(2) . . ? 
C1 B6 B5 58.72(16) . . ? 
B10 B6 B5 60.2(2) . . ? 
B11 B6 B5 108.1(2) . . ? 
C2 B7 B3 60.45(15) . . ? 
C2 B7 B8 106.5(2) . . ? 
B3 B7 B8 59.96(18) . . ? 
C2 B7 B12 105.6(2) . . ? 
B3 B7 B12 108.3(3) . . ? 
B8 B7 B12 60.0(2) . . ? 
C2 B7 B11 58.69(15) . . ? 
B3 B7 B11 108.8(2) . . ? 
B8 B7 B11 108.0(3) . . ? 
B12 B7 B11 59.8(2) . . ? 
B3 B8 B7 59.93(18) . . ? 
B3 B8 B12 108.5(2) . . ? 
B7 B8 B12 60.4(2) . . ? 
B3 B8 B4 60.38(17) . . ? 
B7 B8 B4 108.1(2) . . ? 
B12 B8 B4 108.0(3) . . ? 
B3 B8 B9 108.7(2) . . ? 
B7 B8 B9 108.2(2) . . ? 
B12 B8 B9 59.8(2) . . ? 
B4 B8 B9 60.2(2) . . ? 
B12 B9 B10 60.1(2) . . ? 
B12 B9 B5 108.0(2) . . ? 
B10 B9 B5 60.0(2) . . ? 
B12 B9 B4 107.4(3) . . ? 
B10 B9 B4 108.0(2) . . ? 
B5 B9 B4 60.28(18) . . ? 
B12 B9 B8 59.6(2) . . ? 
B10 B9 B8 107.7(3) . . ? 
B5 B9 B8 107.8(2) . . ? 
B4 B9 B8 59.53(18) . . ? 
B6 B10 B11 60.16(19) . . ? 
B6 B10 B9 108.7(2) . . ? 
B11 B10 B9 108.2(3) . . ? 
B6 B10 B5 60.36(19) . . ? 
B11 B10 B5 108.2(2) . . ? 
B9 B10 B5 60.0(2) . . ? 
B6 B10 B12 108.4(2) . . ? 
B11 B10 B12 60.1(2) . . ? 
B9 B10 B12 59.9(2) . . ? 
B5 B10 B12 107.8(2) . . ? 
C2 B11 B6 59.97(16) . . ? 
C2 B11 B10 106.1(2) . . ? 
B6 B11 B10 59.64(19) . . ? 
C2 B11 B12 105.7(2) . . ? 
B6 B11 B12 108.0(3) . . ? 
B10 B11 B12 60.1(2) . . ? 
C2 B11 B7 58.94(16) . . ? 
B6 B11 B7 108.3(2) . . ? 
B10 B11 B7 107.8(3) . . ? 
B12 B11 B7 59.7(2) . . ? 
B8 B12 B9 60.6(2) . . ? 
B8 B12 B7 59.6(2) . . ? 
B9 B12 B7 108.2(2) . . ? 
B8 B12 B11 108.2(2) . . ? 
B9 B12 B11 108.1(3) . . ? 
B7 B12 B11 60.52(19) . . ? 
B8 B12 B10 108.4(3) . . ? 
B9 B12 B10 60.0(2) . . ? 
B7 B12 B10 108.2(2) . . ? 
B11 B12 B10 59.8(2) . . ? 
 
_diffrn_measured_fraction_theta_max    1.000 
_diffrn_reflns_theta_full              25.00 
_diffrn_measured_fraction_theta_full   1.000 
_refine_diff_density_max    0.230 
_refine_diff_density_min   -0.216 
_refine_diff_density_rms    0.045 
#===END


data_3v
 
_audit_creation_method            SHELXL-97 
_chemical_name_systematic 
; 
 ? 
; 
_chemical_name_common             ? 
_chemical_melting_point           ? 
_chemical_formula_moiety          ? 
_chemical_formula_sum 
 'C23 H32 B10' 
_chemical_formula_weight          416.59 
 
loop_ 
 _atom_type_symbol 
 _atom_type_description 
 _atom_type_scat_dispersion_real 
 _atom_type_scat_dispersion_imag 
 _atom_type_scat_source 
 'C'  'C'   0.0033   0.0016 
 'International Tables Vol C Tables 4.2.6.8 and 6.1.1.4' 
 'H'  'H'   0.0000   0.0000 
 'International Tables Vol C Tables 4.2.6.8 and 6.1.1.4' 
 'B'  'B'   0.0013   0.0007 
 'International Tables Vol C Tables 4.2.6.8 and 6.1.1.4' 
 
_symmetry_cell_setting            Monoclinic 
_symmetry_space_group_name_H-M    P2(1)/c 
 
loop_ 
 _symmetry_equiv_pos_as_xyz 
 'x, y, z' 
 '-x, y+1/2, -z+1/2' 
 '-x, -y, -z' 
 'x, -y-1/2, z-1/2' 
 
_cell_length_a                    11.8291(18) 
_cell_length_b                    16.137(2) 
_cell_length_c                    14.117(2) 
_cell_angle_alpha                 90.00 
_cell_angle_beta                  108.298(3) 
_cell_angle_gamma                 90.00 
_cell_volume                      2558.4(7) 
_cell_formula_units_Z             4 
_cell_measurement_temperature     293(2) 
_cell_measurement_reflns_used     ? 
_cell_measurement_theta_min       ? 
_cell_measurement_theta_max       ? 
 
_exptl_crystal_description        block 
_exptl_crystal_colour             colourless 
_exptl_crystal_size_max           0.50 
_exptl_crystal_size_mid           0.40 
_exptl_crystal_size_min           0.30 
_exptl_crystal_density_meas       ? 
_exptl_crystal_density_diffrn     1.082 
_exptl_crystal_density_method     'not measured' 
_exptl_crystal_F_000              880 
_exptl_absorpt_coefficient_mu     0.055 
_exptl_absorpt_correction_type    multi-scan 
_exptl_absorpt_correction_T_min   0.5656 
_exptl_absorpt_correction_T_max   0.7456
_exptl_absorpt_process_details    ? 
 
_exptl_special_details 
; 
 ? 
; 
 
_diffrn_ambient_temperature       293(2) 
_diffrn_radiation_wavelength      0.71073 
_diffrn_radiation_type            MoK\a 
_diffrn_radiation_source          'fine-focus sealed tube' 
_diffrn_radiation_monochromator   graphite 
_diffrn_measurement_device_type   'BRUKER SMART CCD DIFFRACTOMETER' 
_diffrn_measurement_method        'OMEGA SCAN' 
_diffrn_detector_area_resol_mean  ? 
_diffrn_reflns_number             13629 
_diffrn_reflns_av_R_equivalents   0.0516 
_diffrn_reflns_av_sigmaI/netI     0.0599 
_diffrn_reflns_limit_h_min        -8 
_diffrn_reflns_limit_h_max        14 
_diffrn_reflns_limit_k_min        -19 
_diffrn_reflns_limit_k_max        19 
_diffrn_reflns_limit_l_min        -16 
_diffrn_reflns_limit_l_max        14 
_diffrn_reflns_theta_min          1.81 
_diffrn_reflns_theta_max          25.00 
_reflns_number_total              4506 
_reflns_number_gt                 2401 
_reflns_threshold_expression      >2sigma(I) 
 
_computing_data_collection        'BRUKER SMART CCD DIFFRACTOMETER'  
_computing_cell_refinement        'BRUKER SMART CCD DIFFRACTOMETER'  
_computing_data_reduction         'BRUKER SMART CCD DIFFRACTOMETER'  
_computing_structure_solution     'SHELXS-97 (Sheldrick, 2008)' 
_computing_structure_refinement   'SHELXL-97 (Sheldrick, 2008)' 
_computing_molecular_graphics     'SIEMENS SHELXTL' 
_computing_publication_material   'SIEMENS SHELXTL'  
 
_refine_special_details 
; 
 Refinement of F^2^ against ALL reflections.  The weighted R-factor wR and 
 goodness of fit S are based on F^2^, conventional R-factors R are based 
 on F, with F set to zero for negative F^2^. The threshold expression of 
 F^2^ > 2sigma(F^2^) is used only for calculating R-factors(gt) etc. and is 
 not relevant to the choice of reflections for refinement.  R-factors based 
 on F^2^ are statistically about twice as large as those based on F, and R- 
 factors based on ALL data will be even larger. 
; 
 
_refine_ls_structure_factor_coef  Fsqd  
_refine_ls_matrix_type            full 
_refine_ls_weighting_scheme       calc  
_refine_ls_weighting_details 
 'calc w=1/[\s^2^(Fo^2^)+(0.0893P)^2^+1.0471P] where P=(Fo^2^+2Fc^2^)/3' 
_atom_sites_solution_primary      direct 
_atom_sites_solution_secondary    difmap 
_atom_sites_solution_hydrogens    geom 
_refine_ls_hydrogen_treatment     riding
_refine_ls_extinction_method      none 
_refine_ls_extinction_coef        ? 
_refine_ls_number_reflns          4506 
_refine_ls_number_parameters      298 
_refine_ls_number_restraints      0 
_refine_ls_R_factor_all           0.1241 
_refine_ls_R_factor_gt            0.0620 
_refine_ls_wR_factor_ref          0.2087 
_refine_ls_wR_factor_gt           0.1586 
_refine_ls_goodness_of_fit_ref    1.016 
_refine_ls_restrained_S_all       1.016 
_refine_ls_shift/su_max           0.001 
_refine_ls_shift/su_mean          0.000 
 
loop_ 
 _atom_site_label 
 _atom_site_type_symbol 
 _atom_site_fract_x 
 _atom_site_fract_y 
 _atom_site_fract_z 
 _atom_site_U_iso_or_equiv 
 _atom_site_adp_type 
 _atom_site_occupancy 
 _atom_site_symmetry_multiplicity 
 _atom_site_calc_flag 
 _atom_site_refinement_flags 
 _atom_site_disorder_assembly 
 _atom_site_disorder_group 
C1 C 0.6830(2) 0.17931(16) 0.3744(2) 0.0506(7) Uani 1 1 d . . . 
C2 C 0.7559(2) 0.12339(16) 0.31579(19) 0.0487(7) Uani 1 1 d . . . 
C11 C 0.6832(2) 0.06266(16) 0.24158(19) 0.0475(7) Uani 1 1 d . . . 
C12 C 0.7475(2) 0.01389(18) 0.1847(2) 0.0518(7) Uani 1 1 d . . . 
C13 C 0.7573(3) 0.0426(2) 0.0958(2) 0.0637(8) Uani 1 1 d . . . 
H13A H 0.7255 0.0940 0.0715 0.076 Uiso 1 1 calc R . . 
C14 C 0.8142(3) -0.0044(2) 0.0421(2) 0.0763(10) Uani 1 1 d . . . 
H14A H 0.8204 0.0155 -0.0179 0.092 Uiso 1 1 calc R . . 
C15 C 0.8612(3) -0.0799(3) 0.0773(3) 0.0829(11) Uani 1 1 d . . . 
H15A H 0.8993 -0.1114 0.0412 0.099 Uiso 1 1 calc R . . 
C16 C 0.8525(3) -0.1090(2) 0.1652(3) 0.0869(11) Uani 1 1 d . . . 
H16A H 0.8845 -0.1605 0.1889 0.104 Uiso 1 1 calc R . . 
C17 C 0.7962(3) -0.0626(2) 0.2192(2) 0.0698(9) Uani 1 1 d . . . 
H17A H 0.7910 -0.0829 0.2793 0.084 Uiso 1 1 calc R . . 
C18 C 0.5658(2) 0.05478(17) 0.2264(2) 0.0521(7) Uani 1 1 d . . . 
C19 C 0.4927(3) -0.0037(2) 0.1477(2) 0.0803(11) Uani 1 1 d . . . 
H19A H 0.5434 -0.0311 0.1161 0.120 Uiso 1 1 calc R . . 
H19B H 0.4325 0.0269 0.0987 0.120 Uiso 1 1 calc R . . 
H19C H 0.4557 -0.0442 0.1781 0.120 Uiso 1 1 calc R . . 
C20 C 0.5021(2) 0.10268(17) 0.2829(2) 0.0509(7) Uani 1 1 d . . . 
C21 C 0.3731(2) 0.08295(19) 0.2657(2) 0.0561(8) Uani 1 1 d . . . 
C22 C 0.3407(3) 0.0136(2) 0.3081(3) 0.0780(10) Uani 1 1 d . . . 
H22A H 0.3994 -0.0220 0.3458 0.094 Uiso 1 1 calc R . . 
C23 C 0.2238(4) -0.0036(3) 0.2958(3) 0.1027(14) Uani 1 1 d . . . 
H23A H 0.2041 -0.0502 0.3260 0.123 Uiso 1 1 calc R . . 
C24 C 0.1363(4) 0.0467(4) 0.2400(4) 0.1104(17) Uani 1 1 d . . . 
H24A H 0.0569 0.0348 0.2322 0.133 Uiso 1 1 calc R . . 
C25 C 0.1652(3) 0.1150(4) 0.1952(3) 0.1066(15) Uani 1 1 d . . . 
H25A H 0.1056 0.1495 0.1564 0.128 Uiso 1 1 calc R . . 
C26 C 0.2837(3) 0.1327(3) 0.2076(3) 0.0828(11) Uani 1 1 d . . . 
H26A H 0.3030 0.1788 0.1763 0.099 Uiso 1 1 calc R . . 
C27 C 0.5539(2) 0.16078(17) 0.3509(2) 0.0525(7) Uani 1 1 d . . . 
C28 C 0.4873(3) 0.2085(2) 0.4088(2) 0.0694(9) Uani 1 1 d . . . 
H28A H 0.5297 0.2596 0.4330 0.083 Uiso 1 1 calc R . . 
H28B H 0.4092 0.2230 0.3640 0.083 Uiso 1 1 calc R . . 
C29 C 0.4724(3) 0.1610(2) 0.4963(3) 0.0886(12) Uani 1 1 d . . . 
H29A H 0.5498 0.1535 0.5458 0.106 Uiso 1 1 calc R . . 
H29B H 0.4403 0.1066 0.4739 0.106 Uiso 1 1 calc R . . 
C30 C 0.3904(6) 0.2047(3) 0.5445(4) 0.146(2) Uani 1 1 d . . . 
H30A H 0.4286 0.2556 0.5749 0.175 Uiso 1 1 calc R . . 
H30B H 0.3177 0.2199 0.4925 0.175 Uiso 1 1 calc R . . 
C31 C 0.3602(8) 0.1594(3) 0.6162(7) 0.253(5) Uani 1 1 d . . . 
H31A H 0.3073 0.1913 0.6413 0.379 Uiso 1 1 calc R . . 
H31B H 0.4309 0.1463 0.6699 0.379 Uiso 1 1 calc R . . 
H31C H 0.3214 0.1090 0.5870 0.379 Uiso 1 1 calc R . . 
B3 B 0.7295(3) 0.2265(2) 0.2826(3) 0.0613(9) Uani 1 1 d . . . 
H3 H 0.6695 0.2484 0.2106 0.074 Uiso 1 1 calc R . . 
B4 B 0.7419(3) 0.2777(2) 0.3953(3) 0.0673(10) Uani 1 1 d . . . 
H4 H 0.6894 0.3337 0.3965 0.081 Uiso 1 1 calc R . . 
B5 B 0.7725(3) 0.2031(2) 0.4927(3) 0.0658(10) Uani 1 1 d . . . 
H5 H 0.7398 0.2109 0.5570 0.079 Uiso 1 1 calc R . . 
B6 B 0.7803(3) 0.1041(2) 0.4411(2) 0.0574(9) Uani 1 1 d . . . 
H6 H 0.7529 0.0473 0.4711 0.069 Uiso 1 1 calc R . . 
B7 B 0.8679(3) 0.1801(2) 0.2934(3) 0.0632(10) Uani 1 1 d . . . 
H7 H 0.8980 0.1718 0.2279 0.076 Uiso 1 1 calc R . . 
B8 B 0.8619(3) 0.2784(2) 0.3472(3) 0.0739(11) Uani 1 1 d . . . 
H8 H 0.8896 0.3353 0.3177 0.089 Uiso 1 1 calc R . . 
B9 B 0.8883(3) 0.2640(3) 0.4759(3) 0.0771(12) Uani 1 1 d . . . 
H9 H 0.9330 0.3117 0.5306 0.092 Uiso 1 1 calc R . . 
B10 B 0.9119(3) 0.1572(2) 0.5035(3) 0.0717(11) Uani 1 1 d . . . 
H10 H 0.9718 0.1351 0.5755 0.086 Uiso 1 1 calc R . . 
B11 B 0.8995(3) 0.1051(2) 0.3907(3) 0.0611(9) Uani 1 1 d . . . 
H11 H 0.9502 0.0485 0.3879 0.073 Uiso 1 1 calc R . . 
B12 B 0.9664(3) 0.2038(2) 0.4127(3) 0.0710(11) Uani 1 1 d . . . 
H12 H 1.0624 0.2119 0.4254 0.085 Uiso 1 1 calc R . . 
 
loop_ 
 _atom_site_aniso_label 
 _atom_site_aniso_U_11 
 _atom_site_aniso_U_22 
 _atom_site_aniso_U_33 
 _atom_site_aniso_U_23 
 _atom_site_aniso_U_13 
 _atom_site_aniso_U_12 
C1 0.0450(16) 0.0533(16) 0.0532(17) -0.0070(13) 0.0151(13) 0.0000(13) 
C2 0.0406(15) 0.0553(16) 0.0487(16) 0.0002(13) 0.0119(12) 0.0029(13) 
C11 0.0425(16) 0.0554(17) 0.0449(15) -0.0029(13) 0.0141(12) 0.0008(13) 
C12 0.0408(15) 0.0621(18) 0.0514(17) -0.0060(14) 0.0129(13) 0.0025(14) 
C13 0.0596(19) 0.079(2) 0.0522(19) -0.0040(16) 0.0172(15) 0.0106(16) 
C14 0.064(2) 0.113(3) 0.0528(19) -0.009(2) 0.0202(16) 0.009(2) 
C15 0.069(2) 0.105(3) 0.077(3) -0.021(2) 0.0266(19) 0.019(2) 
C16 0.087(3) 0.083(2) 0.096(3) -0.001(2) 0.036(2) 0.029(2) 
C17 0.078(2) 0.068(2) 0.070(2) 0.0029(17) 0.0321(18) 0.0113(18) 
C18 0.0435(17) 0.0631(18) 0.0495(16) -0.0074(14) 0.0144(12) -0.0023(14) 
C19 0.056(2) 0.110(3) 0.074(2) -0.040(2) 0.0188(16) -0.0144(19) 
C20 0.0395(15) 0.0627(17) 0.0496(16) -0.0020(14) 0.0125(12) -0.0003(13) 
C21 0.0437(16) 0.074(2) 0.0510(17) -0.0096(15) 0.0154(13) -0.0035(15) 
C22 0.066(2) 0.082(2) 0.087(3) -0.004(2) 0.0247(18) -0.0171(19) 
C23 0.088(3) 0.125(4) 0.105(3) -0.022(3) 0.044(3) -0.047(3) 
C24 0.058(3) 0.185(5) 0.097(3) -0.047(3) 0.036(2) -0.041(3) 
C25 0.046(2) 0.178(5) 0.089(3) -0.010(3) 0.0118(19) 0.020(3) 
C26 0.053(2) 0.121(3) 0.072(2) 0.016(2) 0.0158(17) 0.011(2) 
C27 0.0449(16) 0.0592(17) 0.0546(17) -0.0044(14) 0.0174(13) 0.0007(14) 
C28 0.0583(19) 0.077(2) 0.079(2) -0.0199(18) 0.0304(17) -0.0034(16) 
C29 0.090(3) 0.106(3) 0.083(3) -0.030(2) 0.047(2) -0.018(2) 
C30 0.204(6) 0.123(4) 0.178(5) -0.029(4) 0.155(5) -0.017(4) 
C31 0.405(13) 0.102(4) 0.405(13) -0.009(6) 0.349(12) -0.017(6) 
B3 0.056(2) 0.059(2) 0.067(2) 0.0083(18) 0.0174(17) -0.0005(17) 
B4 0.061(2) 0.053(2) 0.086(3) -0.0120(19) 0.021(2) -0.0063(17) 
B5 0.059(2) 0.075(2) 0.058(2) -0.0153(19) 0.0112(17) -0.0078(19) 
B6 0.057(2) 0.063(2) 0.0482(19) 0.0019(16) 0.0102(15) 0.0012(17) 
B7 0.046(2) 0.074(2) 0.071(2) 0.0018(19) 0.0197(17) -0.0088(17) 
B8 0.065(2) 0.062(2) 0.092(3) -0.001(2) 0.020(2) -0.0146(19) 
B9 0.061(2) 0.075(3) 0.087(3) -0.021(2) 0.012(2) -0.015(2) 
B10 0.055(2) 0.084(3) 0.063(2) -0.007(2) -0.0005(18) -0.003(2) 
B11 0.0417(19) 0.067(2) 0.066(2) -0.0031(18) 0.0048(16) 0.0045(16) 
B12 0.044(2) 0.079(3) 0.083(3) -0.009(2) 0.0104(18) -0.0095(18) 
 
_geom_special_details 
; 
 All esds (except the esd in the dihedral angle between two l.s. planes) 
 are estimated using the full covariance matrix.  The cell esds are taken 
 into account individually in the estimation of esds in distances, angles 
 and torsion angles; correlations between esds in cell parameters are only 
 used when they are defined by crystal symmetry.  An approximate (isotropic) 
 treatment of cell esds is used for estimating esds involving l.s. planes. 
; 
 
loop_ 
 _geom_bond_atom_site_label_1 
 _geom_bond_atom_site_label_2 
 _geom_bond_distance 
 _geom_bond_site_symmetry_2 
 _geom_bond_publ_flag 
C1 C27 1.487(4) . ? 
C1 C2 1.640(4) . ? 
C1 B5 1.717(4) . ? 
C1 B4 1.722(4) . ? 
C1 B6 1.733(4) . ? 
C1 B3 1.735(4) . ? 
C2 C11 1.494(4) . ? 
C2 B7 1.719(4) . ? 
C2 B11 1.721(4) . ? 
C2 B6 1.729(4) . ? 
C2 B3 1.730(4) . ? 
C11 C18 1.343(4) . ? 
C11 C12 1.492(4) . ? 
C12 C13 1.377(4) . ? 
C12 C17 1.384(4) . ? 
C13 C14 1.386(4) . ? 
C14 C15 1.367(5) . ? 
C15 C16 1.361(5) . ? 
C16 C17 1.380(4) . ? 
C18 C20 1.476(4) . ? 
C18 C19 1.507(4) . ? 
C20 C27 1.345(4) . ? 
C20 C21 1.501(4) . ? 
C21 C26 1.375(4) . ? 
C21 C22 1.379(4) . ? 
C22 C23 1.367(5) . ? 
C23 C24 1.356(6) . ? 
C24 C25 1.366(6) . ? 
C25 C26 1.386(5) . ? 
C27 C28 1.511(4) . ? 
C28 C29 1.510(5) . ? 
C29 C30 1.522(5) . ? 
C30 C31 1.384(7) . ? 
B3 B8 1.757(5) . ? 
B3 B4 1.757(5) . ? 
B3 B7 1.762(5) . ? 
B4 B8 1.755(6) . ? 
B4 B9 1.762(5) . ? 
B4 B5 1.778(5) . ? 
B5 B9 1.761(6) . ? 
B5 B6 1.769(5) . ? 
B5 B10 1.769(5) . ? 
B6 B10 1.753(5) . ? 
B6 B11 1.768(5) . ? 
B7 B12 1.763(5) . ? 
B7 B8 1.769(5) . ? 
B7 B11 1.780(5) . ? 
B8 B9 1.760(6) . ? 
B8 B12 1.765(5) . ? 
B9 B12 1.765(6) . ? 
B9 B10 1.770(6) . ? 
B10 B11 1.766(5) . ? 
B10 B12 1.773(6) . ? 
B11 B12 1.762(5) . ? 
 
loop_ 
 _geom_angle_atom_site_label_1 
 _geom_angle_atom_site_label_2 
 _geom_angle_atom_site_label_3 
 _geom_angle 
 _geom_angle_site_symmetry_1 
 _geom_angle_site_symmetry_3 
 _geom_angle_publ_flag 
C27 C1 C2 116.3(2) . . ? 
C27 C1 B5 122.5(2) . . ? 
C2 C1 B5 110.6(2) . . ? 
C27 C1 B4 123.7(2) . . ? 
C2 C1 B4 110.2(2) . . ? 
B5 C1 B4 62.3(2) . . ? 
C27 C1 B6 116.1(2) . . ? 
C2 C1 B6 61.59(17) . . ? 
B5 C1 B6 61.70(19) . . ? 
B4 C1 B6 112.9(2) . . ? 
C27 C1 B3 117.8(2) . . ? 
C2 C1 B3 61.61(18) . . ? 
B5 C1 B3 112.6(2) . . ? 
B4 C1 B3 61.1(2) . . ? 
B6 C1 B3 113.6(2) . . ? 
C11 C2 C1 115.9(2) . . ? 
C11 C2 B7 121.8(2) . . ? 
C1 C2 B7 110.9(2) . . ? 
C11 C2 B11 123.9(2) . . ? 
C1 C2 B11 111.0(2) . . ? 
B7 C2 B11 62.31(19) . . ? 
C11 C2 B6 118.3(2) . . ? 
C1 C2 B6 61.84(18) . . ? 
B7 C2 B6 113.1(2) . . ? 
B11 C2 B6 61.66(19) . . ? 
C11 C2 B3 115.2(2) . . ? 
C1 C2 B3 61.88(18) . . ? 
B7 C2 B3 61.45(19) . . ? 
B11 C2 B3 113.0(2) . . ? 
B6 C2 B3 114.1(2) . . ? 
C18 C11 C12 122.7(2) . . ? 
C18 C11 C2 120.8(2) . . ? 
C12 C11 C2 116.4(2) . . ? 
C13 C12 C17 118.4(3) . . ? 
C13 C12 C11 121.1(3) . . ? 
C17 C12 C11 120.5(3) . . ? 
C12 C13 C14 120.6(3) . . ? 
C15 C14 C13 120.0(3) . . ? 
C16 C15 C14 120.1(3) . . ? 
C15 C16 C17 120.3(3) . . ? 
C16 C17 C12 120.6(3) . . ? 
C11 C18 C20 122.8(2) . . ? 
C11 C18 C19 120.1(3) . . ? 
C20 C18 C19 117.0(2) . . ? 
C27 C20 C18 123.7(2) . . ? 
C27 C20 C21 118.5(2) . . ? 
C18 C20 C21 117.8(2) . . ? 
C26 C21 C22 117.7(3) . . ? 
C26 C21 C20 121.7(3) . . ? 
C22 C21 C20 120.6(3) . . ? 
C23 C22 C21 121.2(4) . . ? 
C24 C23 C22 120.6(4) . . ? 
C23 C24 C25 119.7(4) . . ? 
C24 C25 C26 119.9(4) . . ? 
C21 C26 C25 120.9(4) . . ? 
C20 C27 C1 120.4(2) . . ? 
C20 C27 C28 122.8(3) . . ? 
C1 C27 C28 116.8(2) . . ? 
C29 C28 C27 113.5(3) . . ? 
C28 C29 C30 112.7(4) . . ? 
C31 C30 C29 115.4(5) . . ? 
C2 B3 C1 56.50(16) . . ? 
C2 B3 B8 105.2(2) . . ? 
C1 B3 B8 105.2(3) . . ? 
C2 B3 B4 104.5(2) . . ? 
C1 B3 B4 59.10(19) . . ? 
B8 B3 B4 59.9(2) . . ? 
C2 B3 B7 58.96(18) . . ? 
C1 B3 B7 104.6(2) . . ? 
B8 B3 B7 60.3(2) . . ? 
B4 B3 B7 108.1(3) . . ? 
C1 B4 B8 105.8(3) . . ? 
C1 B4 B3 59.80(19) . . ? 
B8 B4 B3 60.0(2) . . ? 
C1 B4 B9 104.9(3) . . ? 
B8 B4 B9 60.1(2) . . ? 
B3 B4 B9 108.2(3) . . ? 
C1 B4 B5 58.73(19) . . ? 
B8 B4 B5 108.1(3) . . ? 
B3 B4 B5 108.7(3) . . ? 
B9 B4 B5 59.7(2) . . ? 
C1 B5 B9 105.2(3) . . ? 
C1 B5 B6 59.58(17) . . ? 
B9 B5 B6 107.8(3) . . ? 
C1 B5 B10 105.3(3) . . ? 
B9 B5 B10 60.2(2) . . ? 
B6 B5 B10 59.4(2) . . ? 
C1 B5 B4 59.01(18) . . ? 
B9 B5 B4 59.7(2) . . ? 
B6 B5 B4 108.5(3) . . ? 
B10 B5 B4 107.9(3) . . ? 
C2 B6 C1 56.57(16) . . ? 
C2 B6 B10 105.2(2) . . ? 
C1 B6 B10 105.3(2) . . ? 
C2 B6 B11 58.95(18) . . ? 
C1 B6 B11 104.6(2) . . ? 
B10 B6 B11 60.2(2) . . ? 
C2 B6 B5 104.2(2) . . ? 
C1 B6 B5 58.72(18) . . ? 
B10 B6 B5 60.3(2) . . ? 
B11 B6 B5 108.0(3) . . ? 
C2 B7 B3 59.59(18) . . ? 
C2 B7 B12 104.9(3) . . ? 
B3 B7 B12 108.0(3) . . ? 
C2 B7 B8 105.2(3) . . ? 
B3 B7 B8 59.7(2) . . ? 
B12 B7 B8 60.0(2) . . ? 
C2 B7 B11 58.90(18) . . ? 
B3 B7 B11 108.7(3) . . ? 
B12 B7 B11 59.7(2) . . ? 
B8 B7 B11 107.8(3) . . ? 
B4 B8 B3 60.0(2) . . ? 
B4 B8 B9 60.2(2) . . ? 
B3 B8 B9 108.3(3) . . ? 
B4 B8 B12 108.2(3) . . ? 
B3 B8 B12 108.1(3) . . ? 
B9 B8 B12 60.1(2) . . ? 
B4 B8 B7 107.9(3) . . ? 
B3 B8 B7 60.0(2) . . ? 
B9 B8 B7 107.9(3) . . ? 
B12 B8 B7 59.8(2) . . ? 
B8 B9 B5 108.6(3) . . ? 
B8 B9 B4 59.8(2) . . ? 
B5 B9 B4 60.6(2) . . ? 
B8 B9 B12 60.1(2) . . ? 
B5 B9 B12 108.3(3) . . ? 
B4 B9 B12 107.9(3) . . ? 
B8 B9 B10 108.6(3) . . ? 
B5 B9 B10 60.2(2) . . ? 
B4 B9 B10 108.6(3) . . ? 
B12 B9 B10 60.2(2) . . ? 
B6 B10 B11 60.3(2) . . ? 
B6 B10 B5 60.3(2) . . ? 
B11 B10 B5 108.1(2) . . ? 
B6 B10 B9 108.1(3) . . ? 
B11 B10 B9 107.6(3) . . ? 
B5 B10 B9 59.7(2) . . ? 
B6 B10 B12 108.2(3) . . ? 
B11 B10 B12 59.7(2) . . ? 
B5 B10 B12 107.5(3) . . ? 
B9 B10 B12 59.8(2) . . ? 
C2 B11 B12 104.8(2) . . ? 
C2 B11 B10 105.0(2) . . ? 
B12 B11 B10 60.3(2) . . ? 
C2 B11 B6 59.39(17) . . ? 
B12 B11 B6 107.9(3) . . ? 
B10 B11 B6 59.5(2) . . ? 
C2 B11 B7 58.79(18) . . ? 
B12 B11 B7 59.7(2) . . ? 
B10 B11 B7 108.0(3) . . ? 
B6 B11 B7 108.4(2) . . ? 
B11 B12 B7 60.6(2) . . ? 
B11 B12 B8 108.8(2) . . ? 
B7 B12 B8 60.2(2) . . ? 
B11 B12 B9 108.0(3) . . ? 
B7 B12 B9 107.9(3) . . ? 
B8 B12 B9 59.8(2) . . ? 
B11 B12 B10 59.9(2) . . ? 
B7 B12 B10 108.5(3) . . ? 
B8 B12 B10 108.3(3) . . ? 
B9 B12 B10 60.0(2) . . ? 
 
_diffrn_measured_fraction_theta_max    1.000 
_diffrn_reflns_theta_full              25.00 
_diffrn_measured_fraction_theta_full   1.000 
_refine_diff_density_max    0.457 
_refine_diff_density_min   -0.249 
_refine_diff_density_rms    0.035 
#===END


data_5 
 
_audit_creation_method            SHELXL-97 
_chemical_name_systematic 
; 
 ? 
; 
_chemical_name_common             ? 
_chemical_melting_point           ? 
_chemical_formula_moiety          ? 
_chemical_formula_sum 
 'C49 H52 B10 Ni P2' 
_chemical_formula_weight          869.66 
 
loop_ 
 _atom_type_symbol 
 _atom_type_description 
 _atom_type_scat_dispersion_real 
 _atom_type_scat_dispersion_imag 
 _atom_type_scat_source 
 'C'  'C'   0.0033   0.0016 
 'International Tables Vol C Tables 4.2.6.8 and 6.1.1.4' 
 'H'  'H'   0.0000   0.0000 
 'International Tables Vol C Tables 4.2.6.8 and 6.1.1.4' 
 'B'  'B'   0.0013   0.0007 
 'International Tables Vol C Tables 4.2.6.8 and 6.1.1.4' 
 'P'  'P'   0.1023   0.0942 
 'International Tables Vol C Tables 4.2.6.8 and 6.1.1.4' 
 'Ni'  'Ni'   0.3393   1.1124 
 'International Tables Vol C Tables 4.2.6.8 and 6.1.1.4' 
 
_symmetry_cell_setting            Monoclinic 
_symmetry_space_group_name_H-M    P2(1)/n
 
loop_ 
 _symmetry_equiv_pos_as_xyz 
 'x, y, z' 
 '-x+1/2, y+1/2, -z+1/2' 
 '-x, -y, -z' 
 'x-1/2, -y-1/2, z-1/2' 
 
_cell_length_a                    11.068(16) 
_cell_length_b                    21.30(3) 
_cell_length_c                    20.99(3) 
_cell_angle_alpha                 90.00 
_cell_angle_beta                  90.45(3) 
_cell_angle_gamma                 90.00 
_cell_volume                      4948(13) 
_cell_formula_units_Z             4 
_cell_measurement_temperature     293(2) 
_cell_measurement_reflns_used     ? 
_cell_measurement_theta_min       ? 
_cell_measurement_theta_max       ? 
 
_exptl_crystal_description        block 
_exptl_crystal_colour             yellow 
_exptl_crystal_size_max           0.50 
_exptl_crystal_size_mid           0.40 
_exptl_crystal_size_min           0.30 
_exptl_crystal_density_meas       ? 
_exptl_crystal_density_diffrn     1.167 
_exptl_crystal_density_method     'not measured' 
_exptl_crystal_F_000              1816 
_exptl_absorpt_coefficient_mu     0.489 
_exptl_absorpt_correction_type    multi-scan 
_exptl_absorpt_correction_T_min   0.5713 
_exptl_absorpt_correction_T_max   0.7456 
_exptl_absorpt_process_details    ? 
 
_exptl_special_details 
; 
 ? 
; 
 
_diffrn_ambient_temperature       293(2) 
_diffrn_radiation_wavelength      0.71073 
_diffrn_radiation_type            MoK\a 
_diffrn_radiation_source          'fine-focus sealed tube' 
_diffrn_radiation_monochromator   graphite 
_diffrn_measurement_device_type   'BRUKER SMART CCD DIFFRACTOMETER'
_diffrn_measurement_method        'OMEGA SCAN'
_diffrn_detector_area_resol_mean  ? 
_diffrn_reflns_number             24209 
_diffrn_reflns_av_R_equivalents   0.0693 
_diffrn_reflns_av_sigmaI/netI     0.0785 
_diffrn_reflns_limit_h_min        -13 
_diffrn_reflns_limit_h_max        13 
_diffrn_reflns_limit_k_min        -15 
_diffrn_reflns_limit_k_max        25 
_diffrn_reflns_limit_l_min        -24 
_diffrn_reflns_limit_l_max        24 
_diffrn_reflns_theta_min          1.36 
_diffrn_reflns_theta_max          25.00 
_reflns_number_total              8543 
_reflns_number_gt                 5660 
_reflns_threshold_expression      >2sigma(I) 
 
_computing_data_collection        'BRUKER SMART CCD DIFFRACTOMETER' 
_computing_cell_refinement        'BRUKER SMART CCD DIFFRACTOMETER' 
_computing_data_reduction         'BRUKER SMART CCD DIFFRACTOMETER' 
_computing_structure_solution     'SHELXS-97 (Sheldrick, 2008)' 
_computing_structure_refinement   'SHELXL-97 (Sheldrick, 2008)' 
_computing_molecular_graphics     'SIEMENS SHELXTL'
_computing_publication_material   'SIEMENS SHELXTL' 
 
_refine_special_details 
; 
 Refinement of F^2^ against ALL reflections.  The weighted R-factor wR and 
 goodness of fit S are based on F^2^, conventional R-factors R are based 
 on F, with F set to zero for negative F^2^. The threshold expression of 
 F^2^ > 2sigma(F^2^) is used only for calculating R-factors(gt) etc. and is 
 not relevant to the choice of reflections for refinement.  R-factors based 
 on F^2^ are statistically about twice as large as those based on F, and R- 
 factors based on ALL data will be even larger. 
; 
 
_refine_ls_structure_factor_coef  Fsqd  
_refine_ls_matrix_type            full 
_refine_ls_weighting_scheme       calc  
_refine_ls_weighting_details 
 'calc w=1/[\s^2^(Fo^2^)+(0.1098P)^2^+0.0000P] where P=(Fo^2^+2Fc^2^)/3' 
_atom_sites_solution_primary      direct 
_atom_sites_solution_secondary    difmap 
_atom_sites_solution_hydrogens    geom 
_refine_ls_hydrogen_treatment     riding
_refine_ls_extinction_method      none 
_refine_ls_extinction_coef        ? 
_refine_ls_number_reflns          8543 
_refine_ls_number_parameters      559 
_refine_ls_number_restraints      0 
_refine_ls_R_factor_all           0.1029 
_refine_ls_R_factor_gt            0.0578 
_refine_ls_wR_factor_ref          0.1796 
_refine_ls_wR_factor_gt           0.1484 
_refine_ls_goodness_of_fit_ref    1.008 
_refine_ls_restrained_S_all       1.008 
_refine_ls_shift/su_max           0.002 
_refine_ls_shift/su_mean          0.000 
 
loop_ 
 _atom_site_label 
 _atom_site_type_symbol 
 _atom_site_fract_x 
 _atom_site_fract_y 
 _atom_site_fract_z 
 _atom_site_U_iso_or_equiv 
 _atom_site_adp_type 
 _atom_site_occupancy 
 _atom_site_symmetry_multiplicity 
 _atom_site_calc_flag 
 _atom_site_refinement_flags 
 _atom_site_disorder_assembly 
 _atom_site_disorder_group 
Ni1 Ni 0.63785(4) 0.772506(19) 0.78695(2) 0.03087(17) Uani 1 1 d . . . 
P1 P 0.48903(8) 0.74256(4) 0.84996(4) 0.0331(2) Uani 1 1 d . . . 
P2 P 0.49044(9) 0.81022(4) 0.72481(4) 0.0329(2) Uani 1 1 d . . . 
C1 C 0.9016(3) 0.79452(17) 0.78049(18) 0.0379(9) Uani 1 1 d . . . 
C2 C 0.7723(3) 0.81200(15) 0.74280(17) 0.0337(8) Uani 1 1 d . . . 
C11 C 0.8758(3) 0.75067(17) 0.83393(18) 0.0381(9) Uani 1 1 d . . . 
C12 C 0.9765(3) 0.73064(16) 0.87611(18) 0.0364(9) Uani 1 1 d . . . 
C13 C 1.0010(4) 0.76466(19) 0.9308(2) 0.0497(11) Uani 1 1 d . . . 
H13A H 0.9598 0.8019 0.9384 0.060 Uiso 1 1 calc R . . 
C14 C 1.0855(4) 0.7438(2) 0.9739(2) 0.0567(12) Uani 1 1 d . . . 
H14A H 1.1010 0.7670 1.0106 0.068 Uiso 1 1 calc R . . 
C15 C 1.1478(4) 0.6890(2) 0.9633(2) 0.0550(12) Uani 1 1 d . . . 
H15A H 1.2034 0.6745 0.9933 0.066 Uiso 1 1 calc R . . 
C16 C 1.1277(4) 0.65592(19) 0.9085(2) 0.0525(11) Uani 1 1 d . . . 
H16A H 1.1718 0.6197 0.9003 0.063 Uiso 1 1 calc R . . 
C17 C 1.0411(4) 0.67653(18) 0.8651(2) 0.0461(10) Uani 1 1 d . . . 
H17A H 1.0266 0.6535 0.8281 0.055 Uiso 1 1 calc R . . 
C18 C 0.7607(3) 0.73131(15) 0.84041(17) 0.0334(8) Uani 1 1 d . . . 
C19 C 0.7424(3) 0.67890(17) 0.88662(19) 0.0398(9) Uani 1 1 d . . . 
C20 C 0.7452(4) 0.6866(2) 0.9523(2) 0.0541(11) Uani 1 1 d . . . 
H20A H 0.7499 0.7266 0.9698 0.065 Uiso 1 1 calc R . . 
C21 C 0.7410(4) 0.6347(3) 0.9916(2) 0.0740(16) Uani 1 1 d . . . 
H21A H 0.7424 0.6403 1.0356 0.089 Uiso 1 1 calc R . . 
C22 C 0.7349(5) 0.5754(3) 0.9675(3) 0.0806(17) Uani 1 1 d . . . 
H22A H 0.7347 0.5409 0.9947 0.097 Uiso 1 1 calc R . . 
C23 C 0.7291(4) 0.5670(2) 0.9033(3) 0.0744(16) Uani 1 1 d . . . 
H23A H 0.7236 0.5267 0.8866 0.089 Uiso 1 1 calc R . . 
C24 C 0.7315(4) 0.61826(18) 0.8626(2) 0.0519(11) Uani 1 1 d . . . 
H24A H 0.7257 0.6121 0.8188 0.062 Uiso 1 1 calc R . . 
C25 C 0.4960(3) 0.79119(16) 0.92130(17) 0.0366(9) Uani 1 1 d . . . 
C26 C 0.5921(4) 0.83082(17) 0.93102(19) 0.0457(10) Uani 1 1 d . . . 
H26A H 0.6555 0.8311 0.9022 0.055 Uiso 1 1 calc R . . 
C27 C 0.5959(5) 0.8700(2) 0.9828(2) 0.0616(12) Uani 1 1 d . . . 
H27A H 0.6613 0.8969 0.9883 0.074 Uiso 1 1 calc R . . 
C28 C 0.5041(6) 0.8702(2) 1.0268(2) 0.0708(15) Uani 1 1 d . . . 
H28A H 0.5074 0.8969 1.0619 0.085 Uiso 1 1 calc R . . 
C29 C 0.4088(5) 0.8309(2) 1.0182(2) 0.0786(16) Uani 1 1 d . . . 
H29A H 0.3467 0.8304 1.0477 0.094 Uiso 1 1 calc R . . 
C30 C 0.4035(4) 0.7919(2) 0.9661(2) 0.0592(12) Uani 1 1 d . . . 
H30A H 0.3372 0.7656 0.9606 0.071 Uiso 1 1 calc R . . 
C31 C 0.4568(3) 0.66189(16) 0.87343(17) 0.0373(9) Uani 1 1 d . . . 
C32 C 0.4535(3) 0.64049(18) 0.9359(2) 0.0446(10) Uani 1 1 d . . . 
H32A H 0.4720 0.6675 0.9694 0.054 Uiso 1 1 calc R . . 
C33 C 0.4223(4) 0.57816(19) 0.9479(2) 0.0554(12) Uani 1 1 d . . . 
H33A H 0.4192 0.5639 0.9898 0.066 Uiso 1 1 calc R . . 
C34 C 0.3966(4) 0.5382(2) 0.8996(3) 0.0666(14) Uani 1 1 d . . . 
H34A H 0.3754 0.4969 0.9085 0.080 Uiso 1 1 calc R . . 
C35 C 0.4014(4) 0.55789(19) 0.8386(2) 0.0626(13) Uani 1 1 d . . . 
H35A H 0.3851 0.5299 0.8057 0.075 Uiso 1 1 calc R . . 
C36 C 0.4307(4) 0.61991(18) 0.8247(2) 0.0499(11) Uani 1 1 d . . . 
H36A H 0.4329 0.6333 0.7825 0.060 Uiso 1 1 calc R . . 
C37 C 0.3425(3) 0.76402(17) 0.81593(18) 0.0417(10) Uani 1 1 d . . . 
H37A H 0.3116 0.7298 0.7900 0.050 Uiso 1 1 calc R . . 
H37B H 0.2853 0.7721 0.8498 0.050 Uiso 1 1 calc R . . 
C38 C 0.3576(3) 0.82267(17) 0.77526(18) 0.0394(9) Uani 1 1 d . . . 
H38A H 0.3695 0.8592 0.8022 0.047 Uiso 1 1 calc R . . 
H38B H 0.2862 0.8294 0.7491 0.047 Uiso 1 1 calc R . . 
C39 C 0.4471(4) 0.74587(16) 0.67220(17) 0.0402(10) Uani 1 1 d . . . 
C40 C 0.5251(4) 0.69655(19) 0.6627(2) 0.0561(12) Uani 1 1 d . . . 
H40A H 0.5996 0.6962 0.6835 0.067 Uiso 1 1 calc R . . 
C41 C 0.4943(6) 0.6475(2) 0.6226(3) 0.0806(17) Uani 1 1 d . . . 
H41A H 0.5476 0.6143 0.6165 0.097 Uiso 1 1 calc R . . 
C42 C 0.3860(7) 0.6481(3) 0.5923(3) 0.0854(18) Uani 1 1 d . . . 
H42A H 0.3648 0.6152 0.5652 0.102 Uiso 1 1 calc R . . 
C43 C 0.3074(6) 0.6969(3) 0.6011(3) 0.0822(17) Uani 1 1 d . . . 
H43A H 0.2332 0.6968 0.5799 0.099 Uiso 1 1 calc R . . 
C44 C 0.3365(4) 0.7458(2) 0.6407(2) 0.0591(12) Uani 1 1 d . . . 
H44A H 0.2825 0.7787 0.6464 0.071 Uiso 1 1 calc R . . 
C45 C 0.4856(3) 0.87827(15) 0.67274(16) 0.0344(8) Uani 1 1 d . . . 
C46 C 0.4571(4) 0.93693(18) 0.69631(19) 0.0523(11) Uani 1 1 d . . . 
H46A H 0.4399 0.9414 0.7394 0.063 Uiso 1 1 calc R . . 
C47 C 0.4536(5) 0.98880(19) 0.6575(2) 0.0663(14) Uani 1 1 d . . . 
H47A H 0.4321 1.0277 0.6740 0.080 Uiso 1 1 calc R . . 
C48 C 0.4821(5) 0.9830(2) 0.5940(2) 0.0656(14) Uani 1 1 d . . . 
H48A H 0.4824 1.0181 0.5676 0.079 Uiso 1 1 calc R . . 
C49 C 0.5098(5) 0.9254(2) 0.5705(2) 0.0606(13) Uani 1 1 d . . . 
H49A H 0.5286 0.9214 0.5275 0.073 Uiso 1 1 calc R . . 
C50 C 0.5107(4) 0.87311(18) 0.60850(18) 0.0459(10) Uani 1 1 d . . . 
H50A H 0.5282 0.8340 0.5911 0.055 Uiso 1 1 calc R . . 
B3 B 0.8438(4) 0.86865(19) 0.7885(2) 0.0440(11) Uani 1 1 d . . . 
H3 H 0.8048 0.8874 0.8326 0.053 Uiso 1 1 calc R . . 
B4 B 1.0026(4) 0.8552(2) 0.7797(2) 0.0485(12) Uani 1 1 d . . . 
H4 H 1.0676 0.8654 0.8182 0.058 Uiso 1 1 calc R . . 
B5 B 1.0206(4) 0.7895(2) 0.7295(2) 0.0472(12) Uani 1 1 d . . . 
H5 H 1.0969 0.7568 0.7353 0.057 Uiso 1 1 calc R . . 
B6 B 0.8744(4) 0.7624(2) 0.7071(2) 0.0442(12) Uani 1 1 d . . . 
H6 H 0.8554 0.7124 0.6984 0.053 Uiso 1 1 calc R . . 
B7 B 0.7854(4) 0.8879(2) 0.7138(2) 0.0464(12) Uani 1 1 d . . . 
H7 H 0.7081 0.9200 0.7088 0.056 Uiso 1 1 calc R . . 
B8 B 0.9299(4) 0.9156(2) 0.7358(3) 0.0534(13) Uani 1 1 d . . . 
H8 H 0.9476 0.9655 0.7453 0.064 Uiso 1 1 calc R . . 
B9 B 1.0389(5) 0.8669(2) 0.6993(3) 0.0559(14) Uani 1 1 d . . . 
H9 H 1.1275 0.8852 0.6848 0.067 Uiso 1 1 calc R . . 
B10 B 0.9608(5) 0.8087(2) 0.6541(2) 0.0542(13) Uani 1 1 d . . . 
H10 H 0.9989 0.7890 0.6102 0.065 Uiso 1 1 calc R . . 
B11 B 0.8026(5) 0.8222(2) 0.6633(2) 0.0484(12) Uani 1 1 d . . . 
H11 H 0.7367 0.8114 0.6253 0.058 Uiso 1 1 calc R . . 
B12 B 0.9042(5) 0.8869(2) 0.6578(3) 0.0551(14) Uani 1 1 d . . . 
H12 H 0.9049 0.9181 0.6160 0.066 Uiso 1 1 calc R . . 
C51 C 0.5661(9) 1.0396(3) 0.8252(3) 0.101(2) Uani 1 1 d . . . 
C52 C 0.4831(11) 1.0800(4) 0.8025(3) 0.121(3) Uani 1 1 d . . . 
H52A H 0.5069 1.1150 0.7793 0.145 Uiso 1 1 calc R . . 
C53 C 0.3610(13) 1.0691(4) 0.8140(4) 0.148(4) Uani 1 1 d . . . 
H53A H 0.3024 1.0962 0.7979 0.177 Uiso 1 1 calc R . . 
C54 C 0.3274(10) 1.0154(5) 0.8510(4) 0.145(3) Uani 1 1 d . . . 
H54A H 0.2471 1.0062 0.8600 0.174 Uiso 1 1 calc R . . 
C55 C 0.4236(9) 0.9771(3) 0.8731(3) 0.108(2) Uani 1 1 d . . . 
H55A H 0.4064 0.9422 0.8980 0.130 Uiso 1 1 calc R . . 
C56 C 0.5359(9) 0.9896(3) 0.8594(3) 0.102(2) Uani 1 1 d . . . 
H56A H 0.5963 0.9627 0.8740 0.122 Uiso 1 1 calc R . . 
C57 C 0.6830(10) 1.0517(5) 0.8062(5) 0.181(4) Uani 1 1 d . . . 
H57A H 0.6849 1.0902 0.7826 0.271 Uiso 1 1 calc R . . 
H57B H 0.7109 1.0179 0.7798 0.271 Uiso 1 1 calc R . . 
H57C H 0.7344 1.0552 0.8431 0.271 Uiso 1 1 calc R . . 
 
loop_ 
 _atom_site_aniso_label 
 _atom_site_aniso_U_11 
 _atom_site_aniso_U_22 
 _atom_site_aniso_U_33 
 _atom_site_aniso_U_23 
 _atom_site_aniso_U_13 
 _atom_site_aniso_U_12 
Ni1 0.0284(3) 0.0327(3) 0.0315(3) 0.00476(18) 0.0027(2) -0.00148(18) 
P1 0.0300(5) 0.0361(5) 0.0334(5) 0.0043(4) 0.0035(4) -0.0029(4) 
P2 0.0343(6) 0.0334(5) 0.0311(5) 0.0022(4) 0.0018(4) -0.0002(4) 
C1 0.029(2) 0.0411(19) 0.043(2) 0.0075(16) 0.0050(18) 0.0002(16) 
C2 0.030(2) 0.0387(19) 0.0322(19) 0.0059(15) -0.0016(16) 0.0002(16) 
C11 0.036(2) 0.0381(18) 0.041(2) 0.0054(16) 0.0035(18) 0.0049(17) 
C12 0.030(2) 0.041(2) 0.038(2) 0.0088(16) 0.0021(17) -0.0034(16) 
C13 0.044(3) 0.056(2) 0.049(3) 0.001(2) 0.000(2) 0.004(2) 
C14 0.049(3) 0.075(3) 0.047(3) -0.003(2) -0.005(2) -0.004(2) 
C15 0.036(2) 0.074(3) 0.055(3) 0.024(2) -0.006(2) 0.000(2) 
C16 0.043(3) 0.047(2) 0.067(3) 0.013(2) 0.004(2) 0.005(2) 
C17 0.042(2) 0.047(2) 0.048(2) 0.0022(18) -0.004(2) 0.0025(19) 
C18 0.033(2) 0.0338(18) 0.034(2) 0.0043(14) 0.0014(17) 0.0001(15) 
C19 0.026(2) 0.043(2) 0.051(2) 0.0120(17) 0.0002(18) -0.0006(16) 
C20 0.046(3) 0.068(3) 0.048(3) 0.016(2) 0.000(2) -0.002(2) 
C21 0.055(3) 0.105(4) 0.061(3) 0.046(3) -0.009(3) -0.009(3) 
C22 0.066(4) 0.078(4) 0.098(5) 0.055(3) 0.001(3) 0.000(3) 
C23 0.048(3) 0.046(3) 0.129(5) 0.026(3) 0.010(3) 0.002(2) 
C24 0.043(3) 0.044(2) 0.069(3) 0.010(2) 0.005(2) 0.0012(19) 
C25 0.038(2) 0.0384(18) 0.033(2) 0.0037(15) 0.0004(17) 0.0032(17) 
C26 0.047(2) 0.046(2) 0.044(2) -0.0010(18) -0.002(2) -0.0036(19) 
C27 0.071(3) 0.053(3) 0.061(3) -0.004(2) -0.017(3) -0.006(2) 
C28 0.105(4) 0.066(3) 0.041(3) -0.016(2) -0.009(3) 0.015(3) 
C29 0.097(4) 0.082(3) 0.057(3) -0.016(3) 0.029(3) 0.004(3) 
C30 0.059(3) 0.062(3) 0.057(3) -0.006(2) 0.017(2) -0.006(2) 
C31 0.031(2) 0.0363(18) 0.044(2) 0.0032(16) 0.0086(17) -0.0027(16) 
C32 0.036(2) 0.048(2) 0.050(2) 0.0068(18) 0.0071(19) 0.0007(18) 
C33 0.052(3) 0.053(2) 0.061(3) 0.023(2) 0.012(2) 0.004(2) 
C34 0.065(3) 0.039(2) 0.096(4) 0.013(3) 0.022(3) -0.006(2) 
C35 0.062(3) 0.043(2) 0.083(4) -0.016(2) 0.014(3) -0.003(2) 
C36 0.051(3) 0.045(2) 0.054(3) -0.0024(19) 0.010(2) -0.0034(19) 
C37 0.037(2) 0.047(2) 0.042(2) 0.0033(17) 0.0027(19) -0.0063(17) 
C38 0.031(2) 0.048(2) 0.039(2) 0.0077(16) 0.0019(17) 0.0054(17) 
C39 0.051(3) 0.0356(19) 0.034(2) -0.0028(16) 0.000(2) -0.0043(18) 
C40 0.066(3) 0.052(2) 0.050(3) -0.009(2) 0.001(2) -0.002(2) 
C41 0.104(5) 0.055(3) 0.084(4) -0.029(3) 0.011(4) 0.002(3) 
C42 0.110(5) 0.069(4) 0.078(4) -0.029(3) 0.000(4) -0.032(4) 
C43 0.084(4) 0.085(4) 0.077(4) -0.020(3) -0.015(3) -0.034(3) 
C44 0.054(3) 0.062(3) 0.060(3) -0.006(2) -0.013(2) -0.010(2) 
C45 0.033(2) 0.0349(18) 0.035(2) 0.0030(15) -0.0055(17) 0.0001(15) 
C46 0.076(3) 0.044(2) 0.037(2) 0.0026(18) 0.002(2) 0.006(2) 
C47 0.106(4) 0.037(2) 0.056(3) 0.005(2) 0.005(3) 0.009(2) 
C48 0.097(4) 0.049(3) 0.051(3) 0.020(2) 0.000(3) 0.008(2) 
C49 0.082(4) 0.063(3) 0.037(2) 0.011(2) 0.003(2) 0.008(2) 
C50 0.054(3) 0.046(2) 0.038(2) 0.0066(17) 0.002(2) 0.0057(19) 
B3 0.043(3) 0.036(2) 0.053(3) 0.005(2) 0.008(2) -0.004(2) 
B4 0.039(3) 0.051(3) 0.056(3) 0.011(2) 0.000(2) -0.014(2) 
B5 0.031(3) 0.061(3) 0.049(3) 0.014(2) 0.006(2) 0.004(2) 
B6 0.042(3) 0.045(2) 0.045(3) 0.0011(19) 0.013(2) 0.004(2) 
B7 0.039(3) 0.044(2) 0.056(3) 0.014(2) 0.004(2) -0.001(2) 
B8 0.045(3) 0.044(2) 0.071(4) 0.016(2) 0.003(3) -0.010(2) 
B9 0.036(3) 0.064(3) 0.068(3) 0.023(3) 0.010(3) -0.006(2) 
B10 0.046(3) 0.067(3) 0.050(3) 0.014(2) 0.017(2) 0.006(3) 
B11 0.047(3) 0.054(3) 0.044(3) 0.011(2) 0.007(2) -0.001(2) 
B12 0.043(3) 0.063(3) 0.060(3) 0.027(3) 0.010(3) -0.001(2) 
C51 0.175(8) 0.070(4) 0.057(4) 0.001(3) 0.011(4) 0.000(5) 
C52 0.232(11) 0.077(5) 0.053(4) -0.004(3) -0.006(6) 0.014(7) 
C53 0.261(14) 0.099(6) 0.083(6) -0.020(5) -0.026(7) 0.046(8) 
C54 0.195(10) 0.132(7) 0.109(6) -0.033(6) 0.022(7) 0.004(7) 
C55 0.173(8) 0.078(4) 0.074(4) -0.008(3) 0.000(5) 0.008(5) 
C56 0.164(7) 0.075(4) 0.065(4) -0.004(3) 0.019(4) -0.002(4) 
C57 0.223(12) 0.151(8) 0.168(9) 0.002(7) 0.045(9) -0.024(8) 
 
_geom_special_details 
; 
 All esds (except the esd in the dihedral angle between two l.s. planes) 
 are estimated using the full covariance matrix.  The cell esds are taken 
 into account individually in the estimation of esds in distances, angles 
 and torsion angles; correlations between esds in cell parameters are only 
 used when they are defined by crystal symmetry.  An approximate (isotropic) 
 treatment of cell esds is used for estimating esds involving l.s. planes. 
; 
 
loop_ 
 _geom_bond_atom_site_label_1 
 _geom_bond_atom_site_label_2 
 _geom_bond_distance 
 _geom_bond_site_symmetry_2 
 _geom_bond_publ_flag 
Ni1 C2 1.950(4) . ? 
Ni1 C18 1.963(4) . ? 
Ni1 P1 2.214(2) . ? 
Ni1 P2 2.231(2) . ? 
P1 C25 1.822(4) . ? 
P1 C31 1.823(4) . ? 
P1 C37 1.825(5) . ? 
P2 C45 1.816(4) . ? 
P2 C39 1.822(4) . ? 
P2 C38 1.838(4) . ? 
C1 C11 1.489(5) . ? 
C1 C2 1.672(6) . ? 
C1 B5 1.707(5) . ? 
C1 B4 1.709(6) . ? 
C1 B6 1.710(6) . ? 
C1 B3 1.712(6) . ? 
C2 B11 1.719(6) . ? 
C2 B6 1.723(5) . ? 
C2 B3 1.729(6) . ? 
C2 B7 1.734(6) . ? 
C11 C18 1.347(5) . ? 
C11 C12 1.481(6) . ? 
C12 C17 1.377(5) . ? 
C12 C13 1.383(6) . ? 
C13 C14 1.369(6) . ? 
C14 C15 1.376(6) . ? 
C15 C16 1.365(6) . ? 
C16 C17 1.388(6) . ? 
C18 C19 1.494(5) . ? 
C19 C20 1.388(6) . ? 
C19 C24 1.392(6) . ? 
C20 C21 1.380(6) . ? 
C21 C22 1.363(8) . ? 
C22 C23 1.361(8) . ? 
C23 C24 1.387(6) . ? 
C25 C26 1.372(5) . ? 
C25 C30 1.396(5) . ? 
C26 C27 1.371(6) . ? 
C27 C28 1.379(7) . ? 
C28 C29 1.357(7) . ? 
C29 C30 1.373(6) . ? 
C31 C36 1.387(5) . ? 
C31 C32 1.388(5) . ? 
C32 C33 1.396(6) . ? 
C33 C34 1.353(7) . ? 
C34 C35 1.348(7) . ? 
C35 C36 1.392(6) . ? 
C37 C38 1.523(5) . ? 
C39 C40 1.375(6) . ? 
C39 C44 1.387(6) . ? 
C40 C41 1.383(7) . ? 
C41 C42 1.352(8) . ? 
C42 C43 1.368(8) . ? 
C43 C44 1.370(7) . ? 
C45 C46 1.381(5) . ? 
C45 C50 1.383(5) . ? 
C46 C47 1.373(6) . ? 
C47 C48 1.378(6) . ? 
C48 C49 1.358(6) . ? 
C49 C50 1.371(6) . ? 
B3 B7 1.739(7) . ? 
B3 B8 1.773(6) . ? 
B3 B4 1.791(7) . ? 
B4 B9 1.756(7) . ? 
B4 B5 1.765(7) . ? 
B4 B8 1.770(7) . ? 
B5 B10 1.759(7) . ? 
B5 B6 1.778(7) . ? 
B5 B9 1.779(7) . ? 
B6 B11 1.757(7) . ? 
B6 B10 1.772(6) . ? 
B7 B8 1.763(8) . ? 
B7 B11 1.767(7) . ? 
B7 B12 1.771(6) . ? 
B8 B12 1.769(8) . ? 
B8 B9 1.771(7) . ? 
B9 B12 1.774(8) . ? 
B9 B10 1.780(8) . ? 
B10 B12 1.783(8) . ? 
B10 B11 1.787(7) . ? 
B11 B12 1.784(7) . ? 
C51 C56 1.328(8) . ? 
C51 C52 1.344(10) . ? 
C51 C57 1.381(11) . ? 
C52 C53 1.393(13) . ? 
C53 C54 1.434(12) . ? 
C54 C55 1.416(11) . ? 
C55 C56 1.305(10) . ? 
 
loop_ 
 _geom_angle_atom_site_label_1 
 _geom_angle_atom_site_label_2 
 _geom_angle_atom_site_label_3 
 _geom_angle 
 _geom_angle_site_symmetry_1 
 _geom_angle_site_symmetry_3 
 _geom_angle_publ_flag 
C2 Ni1 C18 86.39(18) . . ? 
C2 Ni1 P1 169.15(11) . . ? 
C18 Ni1 P1 92.57(14) . . ? 
C2 Ni1 P2 97.13(15) . . ? 
C18 Ni1 P2 174.49(10) . . ? 
P1 Ni1 P2 84.77(11) . . ? 
C25 P1 C31 108.71(18) . . ? 
C25 P1 C37 102.18(19) . . ? 
C31 P1 C37 99.58(18) . . ? 
C25 P1 Ni1 107.47(14) . . ? 
C31 P1 Ni1 125.52(11) . . ? 
C37 P1 Ni1 110.92(15) . . ? 
C45 P2 C39 103.3(2) . . ? 
C45 P2 C38 102.23(17) . . ? 
C39 P2 C38 104.48(19) . . ? 
C45 P2 Ni1 131.10(13) . . ? 
C39 P2 Ni1 105.73(16) . . ? 
C38 P2 Ni1 107.44(17) . . ? 
C11 C1 C2 109.1(3) . . ? 
C11 C1 B5 125.9(3) . . ? 
C2 C1 B5 112.3(3) . . ? 
C11 C1 B4 127.7(4) . . ? 
C2 C1 B4 112.6(3) . . ? 
B5 C1 B4 62.2(3) . . ? 
C11 C1 B6 113.2(3) . . ? 
C2 C1 B6 61.2(2) . . ? 
B5 C1 B6 62.7(3) . . ? 
B4 C1 B6 113.9(3) . . ? 
C11 C1 B3 115.5(3) . . ? 
C2 C1 B3 61.4(2) . . ? 
B5 C1 B3 114.2(3) . . ? 
B4 C1 B3 63.1(3) . . ? 
B6 C1 B3 113.2(3) . . ? 
C1 C2 B11 108.3(3) . . ? 
C1 C2 B6 60.5(3) . . ? 
B11 C2 B6 61.4(3) . . ? 
C1 C2 B3 60.4(2) . . ? 
B11 C2 B3 111.0(3) . . ? 
B6 C2 B3 111.7(3) . . ? 
C1 C2 B7 107.4(3) . . ? 
B11 C2 B7 61.6(3) . . ? 
B6 C2 B7 111.2(3) . . ? 
B3 C2 B7 60.3(3) . . ? 
C1 C2 Ni1 109.4(2) . . ? 
B11 C2 Ni1 132.2(3) . . ? 
B6 C2 Ni1 116.6(3) . . ? 
B3 C2 Ni1 112.7(2) . . ? 
B7 C2 Ni1 129.5(3) . . ? 
C18 C11 C12 124.0(3) . . ? 
C18 C11 C1 117.1(4) . . ? 
C12 C11 C1 118.9(3) . . ? 
C17 C12 C13 118.6(4) . . ? 
C17 C12 C11 122.0(4) . . ? 
C13 C12 C11 119.2(3) . . ? 
C14 C13 C12 120.4(4) . . ? 
C13 C14 C15 120.6(4) . . ? 
C16 C15 C14 119.7(4) . . ? 
C15 C16 C17 119.8(4) . . ? 
C12 C17 C16 120.7(4) . . ? 
C11 C18 C19 115.3(3) . . ? 
C11 C18 Ni1 117.2(3) . . ? 
C19 C18 Ni1 127.5(3) . . ? 
C20 C19 C24 118.1(4) . . ? 
C20 C19 C18 123.7(4) . . ? 
C24 C19 C18 118.0(4) . . ? 
C21 C20 C19 119.9(5) . . ? 
C22 C21 C20 121.5(5) . . ? 
C23 C22 C21 119.4(5) . . ? 
C22 C23 C24 120.4(5) . . ? 
C23 C24 C19 120.6(5) . . ? 
C26 C25 C30 117.7(4) . . ? 
C26 C25 P1 120.0(3) . . ? 
C30 C25 P1 122.3(3) . . ? 
C27 C26 C25 120.7(4) . . ? 
C26 C27 C28 121.0(5) . . ? 
C29 C28 C27 118.9(4) . . ? 
C28 C29 C30 120.5(5) . . ? 
C29 C30 C25 121.1(5) . . ? 
C36 C31 C32 118.6(4) . . ? 
C36 C31 P1 116.6(3) . . ? 
C32 C31 P1 124.8(3) . . ? 
C31 C32 C33 119.4(4) . . ? 
C34 C33 C32 120.9(4) . . ? 
C35 C34 C33 120.4(4) . . ? 
C34 C35 C36 120.4(4) . . ? 
C31 C36 C35 120.2(4) . . ? 
C38 C37 P1 108.9(3) . . ? 
C37 C38 P2 107.3(2) . . ? 
C40 C39 C44 118.8(4) . . ? 
C40 C39 P2 120.0(3) . . ? 
C44 C39 P2 121.1(3) . . ? 
C39 C40 C41 120.9(5) . . ? 
C42 C41 C40 119.4(5) . . ? 
C41 C42 C43 120.4(5) . . ? 
C42 C43 C44 120.8(6) . . ? 
C43 C44 C39 119.6(5) . . ? 
C46 C45 C50 118.0(3) . . ? 
C46 C45 P2 120.8(3) . . ? 
C50 C45 P2 121.2(3) . . ? 
C47 C46 C45 121.4(4) . . ? 
C46 C47 C48 119.8(4) . . ? 
C49 C48 C47 119.1(4) . . ? 
C48 C49 C50 121.5(4) . . ? 
C49 C50 C45 120.2(4) . . ? 
C1 B3 C2 58.1(2) . . ? 
C1 B3 B7 105.4(3) . . ? 
C2 B3 B7 60.0(3) . . ? 
C1 B3 B8 104.8(3) . . ? 
C2 B3 B8 107.1(3) . . ? 
B7 B3 B8 60.2(3) . . ? 
C1 B3 B4 58.4(2) . . ? 
C2 B3 B4 106.1(3) . . ? 
B7 B3 B4 107.6(3) . . ? 
B8 B3 B4 59.6(3) . . ? 
C1 B4 B9 105.7(4) . . ? 
C1 B4 B5 58.8(2) . . ? 
B9 B4 B5 60.7(3) . . ? 
C1 B4 B8 105.1(4) . . ? 
B9 B4 B8 60.3(3) . . ? 
B5 B4 B8 108.6(4) . . ? 
C1 B4 B3 58.5(2) . . ? 
B9 B4 B3 108.0(4) . . ? 
B5 B4 B3 107.7(3) . . ? 
B8 B4 B3 59.7(3) . . ? 
C1 B5 B10 105.2(3) . . ? 
C1 B5 B4 59.0(2) . . ? 
B10 B5 B4 108.0(4) . . ? 
C1 B5 B6 58.7(2) . . ? 
B10 B5 B6 60.1(3) . . ? 
B4 B5 B6 108.0(3) . . ? 
C1 B5 B9 104.8(3) . . ? 
B10 B5 B9 60.4(3) . . ? 
B4 B5 B9 59.4(3) . . ? 
B6 B5 B9 108.2(4) . . ? 
C1 B6 C2 58.3(2) . . ? 
C1 B6 B11 104.9(3) . . ? 
C2 B6 B11 59.2(2) . . ? 
C1 B6 B10 104.5(3) . . ? 
C2 B6 B10 106.9(3) . . ? 
B11 B6 B10 60.8(3) . . ? 
C1 B6 B5 58.6(2) . . ? 
C2 B6 B5 106.6(3) . . ? 
B11 B6 B5 108.1(3) . . ? 
B10 B6 B5 59.4(3) . . ? 
C2 B7 B3 59.7(2) . . ? 
C2 B7 B8 107.4(3) . . ? 
B3 B7 B8 60.8(3) . . ? 
C2 B7 B11 58.8(3) . . ? 
B3 B7 B11 108.3(3) . . ? 
B8 B7 B11 108.7(4) . . ? 
C2 B7 B12 106.7(3) . . ? 
B3 B7 B12 108.9(4) . . ? 
B8 B7 B12 60.1(3) . . ? 
B11 B7 B12 60.6(3) . . ? 
B7 B8 B12 60.2(3) . . ? 
B7 B8 B4 107.5(3) . . ? 
B12 B8 B4 107.5(4) . . ? 
B7 B8 B9 108.1(4) . . ? 
B12 B8 B9 60.1(3) . . ? 
B4 B8 B9 59.4(3) . . ? 
B7 B8 B3 58.9(3) . . ? 
B12 B8 B3 107.4(3) . . ? 
B4 B8 B3 60.7(3) . . ? 
B9 B8 B3 108.1(3) . . ? 
B4 B9 B8 60.3(3) . . ? 
B4 B9 B12 107.9(3) . . ? 
B8 B9 B12 59.9(3) . . ? 
B4 B9 B5 59.9(3) . . ? 
B8 B9 B5 108.0(3) . . ? 
B12 B9 B5 107.5(4) . . ? 
B4 B9 B10 107.4(3) . . ? 
B8 B9 B10 108.0(4) . . ? 
B12 B9 B10 60.2(3) . . ? 
B5 B9 B10 59.2(3) . . ? 
B5 B10 B6 60.5(3) . . ? 
B5 B10 B9 60.4(3) . . ? 
B6 B10 B9 108.4(4) . . ? 
B5 B10 B12 108.0(4) . . ? 
B6 B10 B12 107.5(3) . . ? 
B9 B10 B12 59.7(3) . . ? 
B5 B10 B11 107.6(3) . . ? 
B6 B10 B11 59.2(3) . . ? 
B9 B10 B11 107.6(4) . . ? 
B12 B10 B11 60.0(3) . . ? 
C2 B11 B6 59.4(2) . . ? 
C2 B11 B7 59.6(2) . . ? 
B6 B11 B7 108.0(4) . . ? 
C2 B11 B12 106.8(4) . . ? 
B6 B11 B12 108.2(4) . . ? 
B7 B11 B12 59.8(3) . . ? 
C2 B11 B10 106.4(4) . . ? 
B6 B11 B10 60.0(3) . . ? 
B7 B11 B10 107.6(4) . . ? 
B12 B11 B10 59.9(3) . . ? 
B8 B12 B7 59.7(3) . . ? 
B8 B12 B9 60.0(3) . . ? 
B7 B12 B9 107.6(4) . . ? 
B8 B12 B10 107.9(4) . . ? 
B7 B12 B10 107.6(3) . . ? 
B9 B12 B10 60.1(3) . . ? 
B8 B12 B11 107.7(3) . . ? 
B7 B12 B11 59.6(3) . . ? 
B9 B12 B11 108.0(3) . . ? 
B10 B12 B11 60.1(3) . . ? 
C56 C51 C52 122.0(9) . . ? 
C56 C51 C57 123.1(9) . . ? 
C52 C51 C57 114.7(8) . . ? 
C51 C52 C53 119.6(9) . . ? 
C52 C53 C54 118.9(10) . . ? 
C55 C54 C53 116.0(10) . . ? 
C56 C55 C54 121.7(8) . . ? 
C55 C56 C51 121.8(9) . . ? 
 
_diffrn_measured_fraction_theta_max    0.980 
_diffrn_reflns_theta_full              25.00 
_diffrn_measured_fraction_theta_full   0.980 
_refine_diff_density_max    1.081 
_refine_diff_density_min   -1.217 
_refine_diff_density_rms    0.108 
#===END
